**CRISPR/Cas9-mediated gene deletion of the *ompA* gene in an *Enterobacter* gut symbiont impairs biofilm formation and reduces gut colonization of *Aedes aegypti* mosquitoes**

Shivanand Hegde<sup>1</sup>, Pornjarim Nilyanimit<sup>2</sup>, Elena Kozlova<sup>1</sup>, Hema P. Narra<sup>1</sup>, Sanjeev K. Sahni<sup>1</sup>, Grant L. Hughes<sup>3,4,#</sup>

<sup>1</sup> Department of Pathology, University of Texas Medical Branch, Galveston, TX, USA.

<sup>2</sup> Center of Excellence in Clinical Virology, Chulalongkorn University, Bangkok, Thailand.

<sup>3</sup> Department of Pathology, Institute for Human Infections and Immunity, Center for Tropical Diseases, Center for Biodefense and Emerging Infectious Disease. University of Texas Medical Branch, Galveston, TX, USA.

<sup>4</sup> Current address: Department of Vector Biology and Department of Parasitology, Liverpool School of Tropical Medicine, Pembroke Place, Liverpool, UK.

#Corresponding author. Email: [grant.hughes@lstm.ac.uk](mailto:grant.hughes@lstm.ac.uk)

Running head: CRISPR/Cas9 engineering of a gut bacterium.

## Abstract

Symbiotic bacteria are pervasive in mosquitoes and their presence can influence development, reproduction, and immunity of their host. It is evident that environmental and host genetic factors contribute in shaping the microbiome of mosquitoes, but we have a poor understanding regarding how bacterial genetics affects colonization of the mosquito gut. While CRISPR/Cas9 gene editing is a powerful tool to modify bacterial genomes this approach has yet to be applied to insect symbionts. To demonstrate that gene editing can be completed in non-model bacterial species isolated from insects and to investigate the role of bacterial genes in gut colonization, we mutated the outer membrane protein A (*ompA*) gene of an *Enterobacter* symbiont using the CRISPR/Cas9 system. The  $\Delta ompA$  mutant had an impaired ability to form biofilms and poorly infected *Ae. aegypti* when reared in a mono-association under gnotobiotic conditions. In adults, the mutant had a significantly reduced infection prevalence compared to the wild type or complement strains, while no differences in prevalence were seen in larvae, suggesting bacterial genetic factors are important for adult gut colonization. Integration of genes (antibiotic resistance and fluorescent markers) into the symbiont genome demonstrated this technology can be exploited to develop novel symbiotic control strategies to interfere with arboviral pathogens such Chikungunya, Zika and Yellow fever viruses transmitted by *Aedes* mosquitoes. Our results shed insights onto the role of *ompA* gene in host-microbe interactions in *Ae. aegypti* and confirm that CRISPR/Cas9 gene editing can be employed for genetic manipulation of non-model gut microbes.

## Importance

CRISPR/Cas9 gene editing approaches have revolutionized several biological fields, however despite their applicability for altering bacterial genomes, few studies use this technology in microbes that associated with eukaryotic hosts. Here we use this editing approach to knockout a gene encoding a membrane protein in an *Enterobacter* isolated from *Aedes* mosquitoes and show this gene is essential for biofilm formation and promotes bacteria colonization of the gut. A reduced bacterial load of the mutant compared to the wild type or complement strains, was seen in both larval and adult mosquitoes, however this was most evident in adults, likely due differences in the mode of acquisition of microbes at each life stage. Our work extends CRISPR/Cas9 genetic manipulation into a new bacterial species, and in conjunction with other studies, suggests that members within *Enterobacteriaceae* are amenable to genome engineering by this approach. This study will facilitate the development of novel microbial-based approaches to mitigate mosquito-borne disease.

**Keywords:** CRISPR/Cas9, Gut microbe, Gut colonization, Biofilm, Paratransgenesis, Paratransgenic

## Introduction.

Mosquitoes harbor a community of microbes within their guts. In general, the gut-associated microbiome of mosquitoes tends to have low species richness but can differ greatly between individuals and habitats<sup>1-8</sup>. Importantly, these microbes can modulate many host phenotypes, several of which can influence vectorial capacity<sup>9-11</sup>. As such, it is imperative that we understand how the microbiome is acquired and maintained within mosquito vectors. While environmental factors unquestionably influences mosquito microbiome composition and abundance<sup>2-4,8</sup>, and studies are elucidating the role of microbial interactions<sup>5,7,12,13</sup> and host genetic factors<sup>14-18</sup> in shaping the microbiome, we have a poor understanding regarding bacterial factors that influence colonization of the mosquito gut.

In other invertebrates, several bacterial genes have been implicated in gut colonization. For example, a genome wide screen exploiting transposon-sequencing found a suite of genes from the bacterium *Snodgrassella* involved in colonization of the honey bee gut<sup>19</sup>. These bacterial genes were classified into the broad categories of extracellular interactions, metabolism and stress response<sup>19</sup>. Knock out of a purine biosynthesis gene in *Burkholderia* impaired biofilm formation and reduced bacterial colonization rates in a bean bug. Biofilm formation was also shown to play a role in virulence of pathogenic *Pseudomonas* in artificial infections of *Drosophila*, with strains that lacked the capacity to form biofilms being more virulence to the host, while a hyperbiofilm strain was less virulent than the WT strain<sup>20</sup>. In other blood feeding invertebrates, bacterial genetics also appears critical for host colonization. Knockout of the type II secretion

system in *Aeromonas veronii* reduced infection in *Hirudo verbena* leeches<sup>21</sup>. In Tsetse flies, the outer-membrane protein A (*ompA*) gene of *Sodalis glossinidius* is essential for symbiotic interactions<sup>22</sup>. *Sodalis* mutants lacking the *ompA* gene poorly colonized the fly gut compared to the wild type (WT) *Sodalis*<sup>22</sup> and the mutant strain also had a reduced capacity to form biofilms<sup>23</sup>. Heterologous expression of the *ompA* gene from pathogenic *Escherichia coli* in *Sodalis* mutants induced mortality in the fly implicating this gene as a virulence factor in pathogenic bacteria<sup>22</sup>. Taken together, these studies suggest that bacterial genetic factors are critical for host colonization of invertebrates and that biofilm formation facilitates symbiotic associations in insects.

In mosquitoes, few studies have investigated how bacterial genetics affect gut colonization. However, evidence from experimental evolution studies suggests bacterial genetics plays a critical role. In two separate studies, *Enterobacter* was selected for increased persistence in the gut of *Anopheles gambiae* mosquitoes, the major malaria vector in sub-Saharan Africa, by repeatedly infecting mosquitoes with strains that persisted in the gut for longer periods of time<sup>24,25</sup>. Transcriptomics comparisons of effective and ineffective colonizers in liquid media identified 41 genes that were differentially expressed between these two strains<sup>25</sup>, further implicating the importance of bacterial genetics in mosquito infection, however the role of these genes in colonization of the mosquito gut has not been resolved. In a separate study, *in vitro* screening of a transposon mutant library of *Enterobacter* identified a *waaL* gene mutant that was insensitive to oxidative stress<sup>26</sup>. The *waaL* gene encodes an O antigen ligase which is needed for attachment of the O antigen to lipopolysaccharide and the mutant

was found to have lower rates of colonization of the midguts of *Anopheles* mosquitoes<sup>26</sup>.

Gene knockouts approaches in bacteria provide compelling evidence of the role of bacterial genes in host-microbe interactions<sup>21-23,26-28</sup>. In general, most studies use transposon mutagenesis for gene knockout, which requires screening of the mutant library. As *in vivo* screening is burdensome and in some cases not feasible, a targeted gene knockout approach is highly desirable to investigate the functionality of bacterial genes in host-microbe interactions. In the past few years, the CRISPR/Cas9 gene editing system has been employed to modify bacterial genomes<sup>29-31</sup>. While much of the work has been done in model bacterial species<sup>32-36</sup>, editing approaches have expanded into non-model bacterial systems<sup>37-42</sup>. Despite this expansion, few studies have used this technology in host-associated microbes<sup>43</sup>. In the vector biology field, gene knockout approaches can be used to interrogate the role of bacterial genes responsible for host-microbe interactions, while the ability to integrate genes into the bacterial symbiont genome has great potential for applied paratransgenic control strategies<sup>11,44-46</sup>. Previously, manipulation of non-model symbionts that associate with insect vectors have has been accomplished by plasmid transformation<sup>47-55</sup> or stable transformation of the genome using transposons or integrative plasmids<sup>56-61</sup>, but the use of CRISPR/Cas9 gene editing in symbionts has yet to be accomplished. For paratransgenic strategies, stable site-specific integration of transgenes into the symbiont genome is critical, and as such, the application of CRISPR/Cas9 gene editing technology to non-model bacteria that associate with insect vectors will stimulate research in this field.

132

133 We therefore undertook studies to develop CRISPR/Cas9 genome editing approaches  
 134 in an *Enterobacter* species isolated from *Aedes aegypti* mosquitoes, the major vector of  
 135 arboviruses such as dengue, Zika and Yellow fever viruses. We used the Scarless Cas9  
 136 Assisted Recombineering (no-SCAR) method to disrupt the *ompA* gene of the non-  
 137 model *Enterobacter* species<sup>35</sup>. The no-SCAR approach is a single step genome editing  
 138 system that does not require a selectable marker<sup>35</sup>. After characterization of the mutant  
 139 *in vitro*, we examined the role of the *ompA* gene in host-microbe interactions by re-  
 140 infecting bacteria into mosquito in a mono-association. To demonstrate that the  
 141 CRISPR/Cas9 gene-editing system could be useful for applied symbiotic control  
 142 approaches we inserted genes conferring antibiotic resistance or a fluorescent protein  
 143 into the bacterial genome and re-infected the altered strains back into mosquitoes. Our  
 144 result sheds insights into the role of the *ompA* gene in host-microbe interactions in *Ae.*  
 145 *aegypti* and confirm that CRISPR/Cas9 gene editing can be a powerful tool for genetic  
 146 manipulation of native gut-associated microbes of mosquitoes.

# Results

## *Enterobacter* biofilm formation in *Ae. aegypti* guts

Over the course of conducting mono-axenic infections in *Ae. aegypti* mosquitoes with an *Enterobacter* symbiont, we repeatedly observed a conglomeration of bacterial cells in the gut that was indicative of a biofilm (Figure 1). This formation of bacteria has a similar appearance to biofilms observed in the guts of other insects<sup>20,23</sup>. No bacteria were observed in *Ae. aegypti* when infections were conducted with *E. coli* that was not adapted to the mosquito gut environment (Figure 1), although as seen previously, infection with *E. coli* enabled mosquito development<sup>62-64</sup>. We therefore sort out to examine the role of bacterial genetics in biofilm formation and host colonization of this gut-associated bacterium of *Aedes* mosquitoes. While several genes have been implicated in biofilm formation<sup>20,23,65</sup>, we chose to knockout the *ompA* gene of *Enterobacter* given that this gene has been demonstrated to influence biofilm formation and gut colonization of *Sodalis*<sup>22,23</sup>, an *Enterobacteriaceae* symbiont of Tsetse flies, which is phylogenetically related to *Enterobacter*. The CRISPR/Cas9 genome editing system was employed to edit the symbionts genome.

## Genome editing in non-model *Enterobacter* bacteria isolated from mosquitoes.

To edit the *Enterobacter* isolate that resides within the gut of *Aedes* mosquitoes, we employed the no-SCAR gene editing approach that had been developed in *E. coli*<sup>35</sup>. To optimize the approach in our hands, we performed initial experiments in *E. coli* to delete a ~1 kb region of the *ompA* gene (Figure 2A). As the no-SCAR approach exploits the  $\lambda$ -Red recombineering system to repair double stranded breaks, we supplied cells with a



double stranded DNA template that had regions of homology flanking the gRNA site (250 bp for each arm). Using this approach, we successfully deleted a 1001 bp fragment of the *ompA* gene. Of the colonies we screened, we saw an editing at a frequency of 6.25% (N = 48) (Figure 2A). Given our successful editing in *E. coli*, we employed this technique in the non-model *Enterobacter*. However, we altered our editing procedure to delete a 598 bp fragment from the *Enterobacter ompA* gene. This was done to attain a higher frequency of mutants<sup>66</sup> and accommodate a different PAM site in the *ompA* gene of *Enterobacter*. Using a donor template designed for the *Enterobacter ompA* gene that had similar length flanking homology arms as the previous experiment done in *E. coli*, we obtained mutant knockouts at a rate of 32% (N = 50) (Figure 2B). For both bacterial species, Sanger sequencing across the integration site indicated the deletion occurred at the expected loci in the bacterial genome (Figure 2C; Supplementary text 1 and 2).

#### **Characterization of the *Enterobacter ompA* mutant.**

We quantified the growth rates of the  $\Delta ompA$  mutant in comparison to the WT *Enterobacter* and the  $\Delta ompA/ompA$  complement in liquid LB media. We saw no significant difference between the WT, the  $\Delta ompA$  mutant or the  $\Delta ompA/ompA$  complement (Figure 3A). To examine the stability of the deletion, we subcultured the  $\Delta ompA$  mutant on LB media for 10 generations and performed PCR to amplify across the deletion. At alternative generations PCR analysis indicated the deletion was present indicating genomic stability at this site (Figure 3B).

Previously, *ompA* has been shown to be important in biofilm formation as *Sodalis* deletion mutants were unable to form biofilms<sup>23</sup>. As such we characterized *in vitro* biofilm formation using the crystal violet (CV) biofilm assay. After visual inspection, it was clear the  $\Delta ompA$  mutant had distinctly less biofilm deposition compared to either the WT or the  $\Delta ompA/ompA$  complement (Figure 3C), and after quantification and normalization to account for any difference in growth between the strains, biofilm formation was confirmed to be significantly different between the  $\Delta ompA$  mutant and the WT (Figure 3D; Tukey's multiple comparisons test,  $P < 0.0001$ ) or  $\Delta ompA/ompA$  complement (Tukey's multiple comparisons test,  $P < 0.0001$ ), while there was no significant differences between the WT and the  $\Delta ompA/ompA$  complement (Tukey's multiple comparisons test  $P = 0.2$ ).

### **The role of *ompA* gene in mosquito infection.**

To examine the importance of the *ompA* gene on bacterial colonization of mosquitoes, we infected *Ae. aegypti* mosquitoes in a mono-association under gnotobiotic conditions<sup>6</sup>. This infection method was used to avoid other gut-associated microbes influencing host colonization rates<sup>7</sup> and it also assisted in quantification of introduced bacteria by measuring colony forming units (CFUs). In larvae we saw a significant reduction in bacterial titer in the mutant compared to both the WT (Kruskal-Wallis test;  $P < 0.01$ ) and the  $\Delta ompA/ompA$  complement (Kruskal-Wallis test;  $P < 0.05$ ) (Figure 4A). Similarly, in adults, there was a significant reduction in bacterial infection in the  $\Delta ompA$  mutant compared to either the WT or  $\Delta ompA/ompA$  complement (Kruskal-Wallis test;  $P < 0.001$ ) (Figure 4B). While no significant changes were seen in the prevalence of

infection (number of mosquitoes infected) in the larval stage (Figure 4C, Fisher's exact test; WT compared to  $\Delta ompA$   $P = 0.24$  and  $\Delta ompA$  compared to  $\Delta ompA/ompA$   $P = 0.24$ ), in adults, the prevalence of infection was significantly different (Figure 4D, Fisher's exact test; WT compared to  $\Delta ompA$   $P < 0.0001$  and  $\Delta ompA$  compared to  $\Delta ompA/ompA$   $P < 0.0001$ ), with only 45% of adults infected by the  $\Delta ompA$  mutant compared to 95% and 88% by the WT and  $\Delta ompA/ompA$  complement, respectively. We also examined the growth rates of mosquitoes administered with the WT,  $\Delta ompA$  mutant and  $\Delta ompA/ompA$  complement. No significant differences were seen in the time to pupation (Figure 5A) or percentage of first instar larvae that reached adulthood (Figure 5B) between any of the strains.

## **Integration of genes into the *Enterobacter* chromosome.**

We undertook experiments to demonstrate the CRISPR/Cas9 gene-editing approaches can be used to integrate genes into the chromosome of non-model bacteria that associate with mosquitoes. We created two independent transgenic strains that had either, a gene encoding mCherry fluorescence or a gene encoding resistance to the antibiotic gentamicin, inserted into the bacterial chromosome. These genes were integrated into the genome using the same gRNA that was used for deletional mutagenesis, and as such, these insertions also disrupted the *ompA* gene. Sequencing across the integration site indicated the insertion of these genes occurred within the *ompA* gene and thereby disrupted its function (Figure 6A and 6D). Continual subculturing was undertaken for both strains and molecular analysis indicated the stability of these lines for ten generations (Figure 6B and 6E). To demonstrate the

integrated genes were functional, we observed expression of mCherry fluorescence and successfully cultured the strain containing gentamicin resistance on plates containing the antibiotic (Figure 6C and 6F). Finally, we infected these transgenic strains into mosquitoes to demonstrate that these strains were able to colonize the mosquito gut and functionality of the integrated gene was confirmed by observing fluorescence or by rearing the *Enterobacter ompA::gentamicin* strain in mosquitoes administered sugar supplemented with gentamicin. Fluorescent bacteria were observed in the gut of mosquitoes while no signal was seen in controls (WT *Enterobacter* infected mosquitoes) (Figure 5G). The *Enterobacter ompA::gentamicin* was successfully rescued from mosquitoes reared on gentamicin and was seen to stably infect mosquitoes over time at a density of  $1 \times 10^4$  CFUs/mosquito. Consistent with our previous finding (Figure 4B), the WT bacteria initially infected mosquitoes at higher titers (T test; day 0  $P < 0.001$ ). However, at 4 days post infection (dpi), the total bacterial load of culturable microbes in mosquitoes supplemented with WT *Enterobacter* was significantly reduced when reared on sugar supplemented with antibiotic (T test; day 4  $P < 0.05$ ), and no CFUs were recovered after at 6 dpi (T test; day 6  $P < 0.001$ ) (Figure 6H).

## Discussion.

We harnessed the CRISPR/Cas9 gene editing system to create knockout mutants in an *Enterobacter* gut symbiont of *Ae. aegypti* mosquitoes enabling us to examine the role of bacterial genetics, specifically the *ompA* gene, in biofilm formation and gut colonization. A deletion of the *ompA* gene of *Enterobacter* decreased bacterial colonization of the mosquito host at both the larval and adult stages after infection in a mono-association. Strikingly, we found this effect was most pronounced in adult mosquitoes with more than half of the mosquitoes not possessing any culturable mutants, while there was no difference in prevalence of infection between the mutant and WT bacteria in larvae. The reduced prevalence of mutant bacteria in adults likely reflects differences in microbial colonization of each mosquito life stage. Larvae are continually subjected to bacteria in the larval water habitat while adults only have a short time frame to acquire bacteria immediately after eclosion, when they are thought to imbibe a small amount of larval water which seeds the gut with microbiota<sup>67</sup>. Our data shows greater variation in colonization of the adult stage between the mutant and WT strains, indicating that the *ompA* gene, and potentially bacterial factors in general, may be critical for colonization of the adult gut. These findings are also consistent with other sequence-based studies, that indicate adult stages have greater variability in species composition of their microbiota, while the microbiome of immature stages reflects the larval water habitat<sup>1-8</sup>.

Overall, our findings are similar to studies done in Tsetse flies whereby an *ompA* mutant of *Sodalis*, an *Enterobacteriaceae* symbiont, has impaired biofilm formation and reduced colonization rates<sup>22,23</sup>. These studies, in conjunction with our work, suggests

that the *ompA* gene is imperative for symbiotic associations within dipterans. It also suggests that biofilm formation may be a strategy employed by bacteria to colonize the gut of insects. In pathogenic infections in mammals, biofilms enable bacteria to colonize new niches, promote infection and are associated with virulence<sup>68,69</sup>. Although less is known regarding the importance of biofilm formation in insects, in an artificial *Pseudomonas-Drosophila* infection model, biofilm formation was associated with virulence and host survival<sup>20</sup>. In a natural symbiotic association between bean bugs and *Burkholderia*, disruption of a purine biosynthesis gene in the bacterium also reduce biofilm formation and colonization of the insect<sup>65</sup>. In mosquitoes, gut biofilm formation could also have implications for vector competence as *Chromobacterium*, which was isolated from *Aedes* mosquitoes, produced molecules that inhibited dengue virus only when grown *in vitro* as a biofilm and not when grown in a planktonic state<sup>70</sup>. However, it is unknown if biofilm formation occurred *in vivo*<sup>70</sup>. Our data provide evidence that biofilms occur within the gut of mosquitoes and facilitate host colonization.

While we have shown that the *ompA* gene of *Enterobacter* is important for host colonization, we see no evidence that deletion of this gene alters mosquito development or growth rates. This is in contrast to the *Riptortus-Burkholderia* symbiosis whereby mutation of the *purT* gene in *Burkholderia* resulted in reduced growth rates and reduction in body weight of the host compared to insects that were infected with the WT bacterium<sup>65</sup>. The difference in our study to the findings in the *Riptortus-Burkholderia* symbiosis could be related to different requirements of the bean bug compared to the mosquito host as well as the different genes mutated in the symbionts. Our findings are

consistent with another study in mosquitoes whereby an *ompA* mutant of *E. coli* was reported to not influence growth when a genomic mutant library was screened in *Ae. aegypti* in a mono-association<sup>71</sup>. Using a similar gnotobiotic system that exploits the ability to sterilize mosquito eggs and rescue development of the insect by supplementation, several recent reports describe approaches to create bacteria-free mosquitoes<sup>62,63</sup>. Here, we reared mosquitoes in a mono-association where they were only subjected to *Enterobacter*. However, more than half the adult mosquitoes inoculated with the  $\Delta ompA$  mutant were not infected by bacteria, but nevertheless, had similar development and growth rates compared to mosquito possessing WT bacteria. It would be intriguing to determine if these uninfected mosquitoes were bacteria-free. If so, the use of mutant bacteria that rescue development but cannot colonize mosquitoes may provide a simple means to create sterile bacteria-free mosquitoes.

CRISPR/Cas9 gene editing has revolutionized genetic approaches in model bacteria<sup>32-35</sup>, and while the use of this approach is expanding to other non-model bacteria<sup>37-42</sup>, to our knowledge, there are no examples of editing undertaken in symbiotic microbes. Here we demonstrate that editing approaches functional in *E. coli* can be applied to phylogenetically related symbiotic bacteria that associate within the guts of mosquitoes. Our overall goal was to delete the *ompA* gene in *Enterobacter* and therefore we altered our editing strategy when carrying out experiments in the non-model *Enterobacter* compared to our initial attempts in *E. coli*, and as such it is difficult to compare rates of editing between bacterial species. Nevertheless, the number of mutant colonies was considerably greater in *Enterobacter* compared to *E. coli* indicating the editing approach

is applicable to this symbiotic *Enterobacteriaceae* bacterium. Similar to our findings, a two-plasmid CRISPR/Cas9 system, exploiting the use of  $\lambda$ -Red recombineering, developed in *E. coli* was also functional in the *Enterobacteriaceae*, *Taumella citrea*, without the need for modification<sup>36</sup>. Taken together, these findings suggest that CRISPR/Cas9-based approaches may be applicable to a wide range of *Enterobacteriaceae*. Similar to the original study in *E. coli*<sup>35</sup>, we observed counterselection escapees in our editing experiments. The no-SCAR approach uses a counterselectoin method to edit bacteria and cells that possess both the Cas9 and the gRNA should not be viable as a result of double stranded breaks in their genome. As the genetic basis of counterselection escape remains unclear and our primary objective was to create a mutant strain, we did not pursue the mechanism behind these escapees further.

Previous integration attempts in *E. coli* using the no-SCAR approach inserted a small fragment (80 bp) into the bacterial genome<sup>35</sup>. It was hypothesized however, that this approach could be used to integrate larger sized fragments over 1 kb into the genome based on the efficiency of integration and counterselection escape rates, although screening would be required<sup>35</sup>. Here we demonstrate this is indeed feasible as we inserted 1.3 kb and 1.5 kb fragments into the *Enterobacter* genome, and importantly, these genes, driven by the AmTr promoter<sup>72</sup>, were functional both *in vitro* and *in vivo*. Our work expands the list of bacteria amenable to CRISPR/Cas9 based genome editing approaches and provides an elegant tool to investigate specific bacterial genes that influence host-microbe interactions in mosquito vectors.



347

348 The application of CRISPR/Cas9 genome editing to gut-associated bacteria of  
 349 mosquitoes has significant applied potential. Paratransgenesis strategies are being  
 350 evaluated in a range of medical and agricultural systems to mitigate pathogen  
 351 transmission from insect vectors, however, most approaches engineer symbionts by  
 352 plasmid transformation<sup>47-55</sup> and where genome integration has been accomplished in  
 353 symbionts<sup>56-61</sup>, it has been done with technologies that did not allow for site specific  
 354 integration. Here, we demonstrate site-specific integration of transgenes into the  
 355 bacterial symbiont genome. Paratransgenic approaches suitable for use in the field will  
 356 need to stably integrate genes into the bacterial genome in a manner that does not  
 357 compromise bacterial fitness. As such, the use of CRISPR/Cas9 to engineer specific  
 358 sites in the bacterial genome, such as intergenic regions within the genome, will  
 359 undoubtedly be beneficial for these applied approaches.

360

361 In summary, we have demonstrated that the CRISPR/Cas9 gene editing system can be  
 362 applied to non-model symbiotic bacteria that associate with eukaryotic hosts to  
 363 interrogate the role of bacterial genes in host-microbe associations. We created  
 364 knockout and knockin mutants by deleting and disrupting the *ompA* gene of  
 365 *Enterobacter*. The knockout mutant displayed a reduced ability to form biofilms and  
 366 colonize the gut of *Ae. aegypti* mosquitoes in a mono-association, demonstrating  
 367 bacterial genetic factors are important determinants that influence colonization of  
 368 mosquito guts. *Aedes* mosquitoes are becoming powerful systems to investigate the  
 369 genetics of host-microbe interactions given the scientific community has simple and

370 efficient approaches to alter both the microbes (this study) and mosquito host  
371 genome<sup>73,74</sup> at their disposal, as well as methods to create mono-associated bacterial  
372 lines<sup>64</sup>. Finally, rapid, efficient, and site specific gene editing approaches for gut bacteria  
373 that associate with mosquitoes will facilitate the development of novel paratransgenic  
374 approaches to control arthropod-borne disease.

## Materials and Methods

**Bacterial and mosquito strains.** *E. coli* BL21(DE3) (NEB) and an *Enterobacter* strain previous isolated from a lab-reared colony of *Ae. albopictus* (Galveston) mosquitoes<sup>7</sup> were used in this study. Cultures were grown in liquid LB media at 37°C with the appropriate antibiotic unless stated otherwise. Mosquitoes were reared in the UTMB insectary under conventional conditions or in mono-associations (described below).

**CRISPR gene editing.** Editing the *ompA* gene of *E. coli* and *Enterobacter* (Supplementary Table 1) was complete as described in Reisch and Prather<sup>35</sup>. The photospacer sequence for the *ompA* gene was designed using the CHOPCHOP<sup>75</sup>, and cloned into pKDsgRNA-ack plasmid<sup>35</sup> directly upstream of gRNA scaffold using REPLACR mutagenesis protocol<sup>76</sup> (Supplementary Table 2). The plasmids were acquired from Addgene (Supplementary Table 1; Addgene plasmid 62655 and 62654). The resulting plasmids pKDsgRNA-Ec-*ompA* and pKDsgRNA-Ent-*ompA* were Sanger sequenced to confirm insertion of photospacer sequence. These plasmids were then transformed into either *E. coli* or *Enterobacter* containing the pCas9-CR4 plasmid. Transformants were selected at 30°C on LB agar plate containing spectinomycin (50 µg/mL), chloramphenicol (34 µg/mL), and with or without anhydrotetracycline (aTC) at 100ng/mL. Colonies from the –aTC plate were grown overnight in LB broth with the appropriate antibiotic at 30°C. A 1:100 diluted overnight culture was (grown until 0.4 OD<sub>600</sub>) supplemented with 1.2% arabinose to induce the expression of λ-Red recombinase. Cells were then transformed with 1-1.5 µg of double stranded donor DNA that flanked the PAM site for homologous recombination. Donor DNA was created by

either PCR amplification or by gene synthesis (Genewiz). Regardless of the method of construction, each donor had flanking regions of 250 bp homologous to the target DNA. The resulting colonies were screened for mutations by colony PCR with primers flanking the integration site and positive clones were Sanger sequenced. Positive colonies were grown in LB broth and genomic DNA was isolated. For further validation, the flanking regions of deletion or insertions were amplified and the PCR product Sanger sequenced.

**Stability of insertion.** The stability of the knockout  $\Delta ompA$  mutant and the knockin  $ompA::gentamicin$  and  $ompA::mCherry$  strains was assessed in LB medium. The  $ompA::mCherry$  and knockout  $\Delta ompA$  mutant cultures were grown for 10 passages in LB broth. At each passage 40  $\mu$ l of culture was transferred into 4ml fresh LB medium. The  $ompA::gentamicin$  strain was grown with or without gentamicin (50  $\mu$ g/mL). Genomic DNA was isolated from the 0, 2, 4, 6, 8 and 10<sup>th</sup> subculture and PCR that amplified across the integration site was performed.

**Complementation of *ompA* mutant.** Functional rescue of the *ompA* mutation was achieved by complementing the mutant with the WT gene. The WT *ompA* gene was amplified from *Enterobacter* genomic DNA and cloned into the pRAM-mCherry vector<sup>7</sup> and thereby creating pRAM-mCherry-*Ent-OmpA*. The Sanger sequence-verified plasmid was transformed into the  $\Delta ompA$  mutant, thereby generating the  $\Delta ompA/ompA$  complement strain. Colonies that acquired the plasmid were selected on LB plates containing kanamycin (50  $\mu$ g/mL).

**In vitro characterization of *Enterobacter* strains.** To assess the impact of the gene deletion on bacterial growth the WT,  $\Delta ompA$  mutant and  $\Delta ompA/ompA$  complement were grown in LB broth and the density of bacteria (OD<sub>600</sub>) was quantified by spectrophotometer. A 1:100 dilution of an overnight culture was inoculated into a 5 ml LB broth in 50 ml tube and incubated at 37°C for 24 hrs. At 2, 4, 6, 8, 10, 12 and 24 hours growth was recorded at OD<sub>600</sub>. The biofilm assay was performed as described previously<sup>77,78</sup>. Briefly, biofilm formation by *Enterobacter* strains was quantified on polystyrene microtiter plates after 72 h of incubation at 37°C by CV staining. Three independent experiments were performed, and the data were represented as CV OD<sub>570</sub> after normalizing by CFUs.

**Mosquito infections.** Mono-association in *Ae. aegypti* mosquitoes were done using gnotobiotic infection procedure<sup>64</sup>, with slight modifications<sup>7</sup>. Briefly, mosquito eggs were sterilized for 5 min in 70% ethanol, 3 min 3% bleach+0.01% Coverage Plus NPD (Steris Corp.), 5 min in 70% ethanol then rinsed three times in sterile water. Eggs were vacuumed hatched for 30-45 min and left overnight at room temperature to hatch any remaining eggs. Exactly twenty L1 larvae were transferred to T175 flask containing 60 ml of sterile water and fed on alternative days with 60 µl of fish food (1 µg/µl). Larvae were inoculated with 1x10<sup>7</sup>/ml of either the WT *Enterobacter*, the  $\Delta ompA$  mutant or the  $\Delta ompA/ompA$  complement. The WT and  $\Delta ompA$  strains were transformed with the pRAM-mCherry plasmid that conferred resistance to kanamycin (but did not possess a functional *ompA* gene). L4 larvae were collected, washed three times with 1X PBS, and

then homogenized in 500  $\mu$ l of 1X PBS and 50  $\mu$ l of homogenate was plated on LB agar containing 50  $\mu$ g/mL kanamycin. Similarly, adult mosquitoes were collected 3-4 days post emergence and bacterial infection was quantified in the same manner as larvae. In order to assess the growth of the mosquitoes, time to pupation and growth rate were observed. Time to pupation was determined by quantifying the number of pupae each day post hatching, while survival to adulthood was calculated by quantifying the number of L1 larvae that reached adulthood. The experiment was repeated three times.

Knock-in mutants were administered to adult *Ae. aegypti* in a sugar meal. Three to four day old mosquitoes were fed with  $1 \times 10^7$  of WT or the  $\Delta ompA::gentamicin$  strain for three days in 10% sucrose solution. After three days, mosquitoes were either administered sugar supplemented with gentamicin (50  $\mu$ g/mL) or sugar without antibiotic. CFUs were determined at days 0, 2, 4, and 6 dpi by plating homogenized mosquitoes (N=10) on LB agar. Similarly, the  $\Delta ompA::mCherry$  and WT *Enterobacter* were fed to mosquitoes and midguts were dissected to assess the colonization of bacteria in the tissue. For visualization of bacteria, midguts were fixed in 1% paraformaldehyde (PFA) in 1X PBS for 30 minutes and permeabilized with 0.01% Triton X-100 in 1X PBS for 20 min. The tissues were stained with 1:250 diluted Phalloidin (Sigma) for 20 minutes and samples were washed twice with 1X PBS for 10 minutes. Finally, midguts were then stained with 1:500 diluted DAPI (Invitrogen) for 10 min. Samples were transferred to slides and mounted with ProLong™ Gold Antifade (Invitrogen). The slides were observed under Revolve FL (ECHOLAB).

## **Acknowledgements.**

We would like to thank the UTMB insectary core for providing mosquitoes. GLH was supported by NIH grants (R21AI138074, R21AI124452 and R21AI129507), a University of Texas Rising Star award, the Western Gulf Center of Excellence for Vector-borne Diseases (CDC grant CK17-005), the Robert J. and Helen Kleberg Foundation and the Gulf Coast Consortia. This work was also supported by a James W. McLaughlin postdoctoral fellowship at the University of Texas Medical Branch to SH and a Dutsadi Piphat Scholarship and Thailand Research Chair Grant from NSTDA (p-15-50004) to PN. We also wish to thank Dr Ulrike Munderloh (University of Minnesota) for the kind gift of the pRAM plasmid.

## **Competing interests.**

The authors declare no competing interests.

# Figure legends.

**Figure 1. Midgut infection of *Enterobacter* and *E. coli* in mono-associations of *Aedes* mosquitoes.** *Enterobacter* forms a biofilm in the gut of *Aedes aegypti* mosquitoes (left) while no bacteria were observed in the gut of mosquitoes reared with *E. coli* under gnotobiotic conditions (right). Bacteria possessed a plasmid expressing mCherry. Blue – host nuclei. Green – host actin cytoskeleton stained with phalloidin. The scale bar is 70  $\mu$ m.

**Figure 2. CRISPR/Cas9 genome editing in bacteria.** A schematic of the editing approach and screening of putative mutants in *E. coli* (A) and *Enterobacter* (B). A ~1kb fragment of *E. coli* BL21(DE3) was deleted using no-SCAR protocol. The 250 bp of left arm (LA) and right arm (RA) was assembled to generate 500 bp donor DNA. The transformants were screened via colony PCR with primers binding in regions flanking the deletion. Similar to strategy employed in *E. coli*, knockout of the *ompA* gene from *Enterobacter* isolated from the mosquito gut was created by deleting the 598 bp fragment. The green star indicates the PAM site in the *ompA* gene. (C) The sequence of the *ompA* mutation in *E. coli* and *Enterobacter* was confirmed by Sanger sequencing. The sequence above the gene within the dotted line has been deleted. The chromatogram shows the 10 bp flanking the deletion.

**Figure 3. In vitro characterization of the *ompA* mutation.** The *Enterobacter*  $\Delta$ *ompA* mutant had a similar growth rate compared to both the WT and the  $\Delta$ *ompA/ompA*



complement in liquid LB media (A). The stability of mutant was evaluated *in vitro* by continuous subculturing in LB medium (B). Genomic DNA of alternative subcultures was used as template for PCR using gene specific primers that amplified across the deletion. Two separate gel images were merged to create the figure 2B. Passage 8 was run on a separate gel to passages 0 – 6. Biofilm formation was assessed using the CV biofilm assay for the WT,  $\Delta ompA$  mutant and the  $\Delta ompA/ompA$  complement (C). Quantification of the relative biofilm formation normalized by the number of bacteria per well (D).

**Figure 4. The  $\Delta ompA$  mutant poorly infected mosquitoes.** Infection of *Enterobacter* strains (WT,  $\Delta ompA$  mutant and  $\Delta ompA/ompA$  complement) reared in a mono-association using a gnotobiotic rearing approach for larvae (A) and adults (B). L4 and 3-4 days post emergence adults were screened for bacterial load by plating on LB media to quantify the bacteria. The prevalence of infection (number of mosquitoes infected) between the treatments was calculated comparing number of infected to uninfected larvae (C) or adults (D).

**Figure 5. The  $\Delta ompA$  mutant does not affect growth rates or development of mosquitoes.** The growth rate (time to pupation) (A) and development (percentage of L1 larvae to reach adulthood) (B) was observed in mosquitoes infected with *Enterobacter* strains (WT,  $\Delta ompA$  mutant and  $\Delta ompA/ompA$  complement) reared in a mono-association.

**Figure 6. Integration of mCherry and gentamicin into the *Enterobacter* genome.**

Sanger sequence across the integration site, stability of the inserted gene and *in vitro* expression of the inserted gene for the  $\Delta ompA::mCherry$  (A-C) and the  $\Delta ompA::gentamicin$  (D-F) strains. The chromatogram shows the sequence spanning the inserted sites. Strains were continually subcultured for 10 passages and PCR was done to examine the stability of the insert (B;  $\Delta ompA::mCherry$  plus WT; E  $\Delta ompA::gentamicin$  passaged with (ab+) or without (ab-) gentamicin plus WT). mCherry fluorescence or ability to grow on selective media containing gentamicin confirmed the expression of the transgene *in vitro*. Mosquitoes were inoculated with the *Enterobacter* strains to confirm expression of the transgene *in vivo*. Dissected midgut infected with  $\Delta ompA::mCherry$  (left) or negative control (right; WT bacteria without expression plasmid) (G). Midguts were stained with phalloidin (green) and DAPI (blue). The scale bar is 30  $\mu$ M. The WT and  $\Delta ompA::gentamicin$  *Enterobacter* strains were fed to adult mosquitoes for 3 days in a sugar meal before gentamicin was administered to mosquitoes in a sugar meal (H). Mosquitoes were collected every second day and CFUs assessed. Pairwise comparisons were conducted at each time point using a T test (\* -  $P < 0.05$ , \*\*\*  $P < 0.001$ , \*\*\*\*  $P < 0.0001$ ).

# References.

1. Osei-Poku, J., Mbogo, C. M., Palmer, W. J. & Jiggins, F. M. Deep sequencing reveals extensive variation in the gut microbiota of wild mosquitoes from Kenya. *Mol Ecol* **21**, 5138–5150 (2012).
2. Boissière, A. *et al.* Midgut microbiota of the malaria Mosquito vector *Anopheles gambiae* and interactions with *Plasmodium falciparum* Infection. *PLoS Pathog* **8**, e1002742 (2012).
3. David, M. R., Santos, L. M. B. D., Vicente, A. C. P. & Maciel-de-Freitas, R. Effects of environment, dietary regime and ageing on the dengue vector microbiota: evidence of a core microbiota throughout *Aedes aegypti* lifespan. *Mem Inst Oswaldo Cruz* **111**, 577–587 (2016).
4. Muturi, E. J., Kim, C.-H., Bara, J., Bach, E. M. & Siddappaji, M. H. *Culex pipiens* and *Culex restuans* mosquitoes harbor distinct microbiota dominated by few bacterial taxa. *Parasit Vectors* **9**, 18 (2016).
5. Hughes, G. L. *et al.* Native microbiome impedes vertical transmission of *Wolbachia* in *Anopheles* mosquitoes. *Proc Natl Acad Sci USA* **111**, 12498–12503 (2014).
6. Coon, K. L., Brown, M. R. & Strand, M. R. Mosquitoes host communities of bacteria that are essential for development but vary greatly between local habitats. *Mol Ecol* **25**, 5806–5826 (2016).
7. Hegde, S. *et al.* Microbiome interaction networks and community structure from lab-reared and field-collected *Aedes aegypti*, *Aedes albopictus*, and *Culex quinquefasciatus* mosquito vectors. *bioRxiv* 1–56 (2018). doi:10.1101/337311
8. Wang, Y., Gilbreath, T. M., Kukutla, P., Yan, G. & Xu, J. Dynamic gut microbiome across life history of the malaria mosquito *Anopheles gambiae* in Kenya. *PLoS ONE* **6**, e24767–9 (2011).
9. Weiss, B. L. & Aksoy, S. Microbiome influences on insect host vector competence. *Trends Parasitol* **27**, 514–522 (2011).
10. Hegde, S., Rasgon, J. L. & Hughes, G. L. The microbiome modulates arbovirus transmission in mosquitoes. *Current Opinion in Virology* **15**, 97–102 (2015).
11. Saldaña, M. A., Hegde, S. & Hughes, G. L. Microbial control of arthropod-borne disease. *Mem Inst Oswaldo Cruz* **112**, 81–93 (2017).
12. Audsley, M. D., Ye, Y. H. & McGraw, E. A. The microbiome composition of *Aedes aegypti* is not critical for *Wolbachia*-mediated inhibition of dengue virus. *PLoS Negl Trop Dis* **11**, e0005426 (2017).
13. Muturi, E. J., Bara, J. J., Rooney, A. P. & Hansen, A. K. Midgut fungal and bacterial microbiota of *Aedes triseriatus* and *Aedes japonicus* shift in response to La Crosse virus infection. *Mol Ecol* **25**, 4075–4090 (2016).
14. Stathopoulos, S., Neafsey, D. E., Lawniczak, M. K. N., Muskavitch, M. A. T. & Christophides, G. K. Genetic dissection of *Anopheles gambiae* gut epithelial responses to *Serratia marcescens*. *PLoS Pathog* **10**, e1003897 (2014).
15. Xiao, X. *et al.* A mesh-duox pathway regulates homeostasis in the insect gut. *Nat. Microbiol* **2**, 17020 (2017).

16. Pang, X. *et al.* Mosquito C-type lectins maintain gut microbiome homeostasis. *Nat. Microbiol* **1**, 16023 (2016).
17. Short, S. M., Mongodin, E. F., MacLeod, H. J., Talyuli, O. A. C. & Dimopoulos, G. Amino acid metabolic signaling influences *Aedes aegypti* midgut microbiome variability. *PLoS Negl Trop Dis* **11**, e0005677–29 (2017).
18. Kumar, S., Molina-Cruz, A., Gupta, L., Rodrigues, J. & Barillas-Mury, C. A peroxidase/dual oxidase system modulates midgut epithelial immunity in *Anopheles gambiae*. *Science* **327**, 1644–1648 (2010).
19. Powell, J. E., Leonard, S. P., Kwong, W. K., Engel, P. & Moran, N. A. Genome-wide screen identifies host colonization determinants in a bacterial gut symbiont. *Proc Natl Acad Sci USA* **113**, 13887–13893 (2016).
20. Mulcahy, H., Sibley, C. D., Surette, M. G. & Lewenza, S. *Drosophila melanogaster* as an animal model for the study of *Pseudomonas aeruginosa* biofilm infections *in vivo*. *PLoS Pathog* **7**, e1002299–14 (2011).
21. Maltz, M. & Graf, J. The type II secretion system is essential for erythrocyte lysis and gut colonization by the leech digestive tract symbiont *Aeromonas veronii*. *Appl Environ Microbiol* **77**, 597–603 (2011).
22. Weiss, B. L., Wu, Y., Schwank, J. J., Tolwinski, N. S. & Aksoy, S. An insect symbiosis is influenced by bacterium-specific polymorphisms in outer-membrane protein A. *Proc Natl Acad Sci USA* **105**, 15088–15093 (2008).
23. Maltz, M. A., Weiss, B. L., O'Neill, M., Wu, Y. & Aksoy, S. OmpA-mediated biofilm formation is essential for the commensal bacterium *Sodalis glossinidius* to colonize the tsetse fly gut. *Appl Environ Microbiol* **78**, 7760–7768 (2012).
24. Riehle, M. A., Moreira, C. K., Lampe, D., Lauzon, C. & Jacobs-Lorena, M. Using bacteria to express and display anti-*Plasmodium* molecules in the mosquito midgut. *Int J Parasitol* **37**, 595–603 (2007).
25. Dennison, N. J. *et al.* Functional genomic analyses of *Enterobacter*, *Anopheles* and *Plasmodium* reciprocal interactions that impact vector competence. *Malar J* **15**, 425 (2016).
26. Pei, D. *et al.* The *waaL* gene mutation compromised the inhabitation of *Enterobacter* sp. Ag1 in the mosquito gut environment. *Parasit Vectors* **8**, 1–10 (2015).
27. Enomoto, S., Chari, A., Clayton, A. L. & Dale, C. Quorum sensing attenuates virulence in *Sodalis praecaptivus*. *Cell Host Microbe* **21**, 629–636.e5 (2017).
28. Dale, C., Young, S. A., Haydon, D. T. & Welburn, S. C. The insect endosymbiont *Sodalis glossinidius* utilizes a type III secretion system for cell invasion. *Proc Natl Acad Sci USA* **98**, 1883–1888 (2001).
29. Selle, K. & Barrangou, R. Harnessing CRISPR-Cas systems for bacterial genome editing. *Trends Microbiol* **23**, 225–232 (2015).
30. Barrangou, R. & van Pijkeren, J. P. Exploiting CRISPR-Cas immune systems for genome editing in bacteria. *Curr Opin Biotechnol* **37**, 61–68 (2016).
31. Sander, J. D. & Joung, J. K. CRISPR-Cas systems for editing, regulating and targeting genomes. *Nat Biotechnol* **32**, 347–355 (2014).
32. Jiang, W., Bikard, D., Cox, D., Zhang, F. & Marraffini, L. A. RNA-guided editing of bacterial genomes using CRISPR-Cas systems. *Nat Biotechnol* **31**, 233–239 (2013).

33. Ronda, C., Pedersen, L. E., Sommer, M. O. A. & Nielsen, A. T. CRIMAGE: CRISPR Optimized MAGE Recombineering. *Sci Rep* **6**, 19452 (2016).
34. Li, Y. *et al.* Metabolic engineering of *Escherichia coli* using CRISPR–Cas9 mediated genome editing. *Metabolic Engineering* **31**, 13–21 (2015).
35. Reisch, C. R. & Prather, K. L. J. The no-SCAR (Scarless Cas9 Assisted Recombineering) system for genome editing in *Escherichia coli*. *Sci Rep* **5**, 15096 (2015).
36. Jiang, Y. *et al.* Multigene Editing in the *Escherichia coli* Genome via the CRISPR-Cas9 System. *Appl Environ Microbiol* **81**, 2506–2514 (2015).
37. Tong, Y., Roberts, H. L., Blin, K., Weber, T. & Lee, S. Y. CRISPR-Cas9 toolkit for *Actinomyces* Genome Editing. *Methods Mol Biol* **1671**, 163–184 (2018).
38. Li, K., Cai, D., Wang, Z., He, Z. & Chen, S. Development of an efficient genome editing tool in *Bacillus licheniformis* using CRISPR-Cas9 nickase. *Appl Environ Microbiol* **AEM.02608–17** (2018). doi:10.1128/AEM.02608-17
39. Mougias, I. *et al.* Efficient genome editing of a facultative thermophile using mesophilic spCas9. *ACS Synth Biol* **6**, 849–861 (2017).
40. Oh, J.-H. & van Pijkeren, J. P. CRISPR-Cas9-assisted recombineering in *Lactobacillus reuteri*. *Nucleic Acids Res* **42**, e131–e131 (2014).
41. Cobb, R. E., Wang, Y. & Zhao, H. High-efficiency multiplex genome editing of *Streptomyces* species using an engineered CRISPR/Cas System. *ACS Synth Biol* **4**, 723–728 (2014).
42. Jiang, Y. *et al.* CRISPR-Cpf1 assisted genome editing of *Corynebacterium glutamicum*. *Nat Commun* **8**, 15179 (2017).
43. Waller, M. C., Bober, J. R., Nair, N. U. & Beisel, C. L. Toward a genetic tool development pipeline for host-associated bacteria. *Curr Opin Microbiol* **38**, 156–164 (2017).
44. Wilke, A. B. B. & Marrelli, M. T. Paratransgenesis: a promising new strategy for mosquito vector control. *Parasit Vectors* **8**, 391–19 (2015).
45. Arora, A. K. & Douglas, A. E. Hype or opportunity? Using microbial symbionts in novel strategies for insect pest control. *J Insect Physiol* **103**, 10–17 (2017).
46. Ricci, I. *et al.* Mosquito/microbiota interactions: from complex relationships to biotechnological perspectives. *Curr Opin Microbiol* **15**, 278–284 (2012).
47. Bisi, D. C. & Lampe, D. J. Secretion of anti-*Plasmodium* effector proteins from a natural *Pantoea agglomerans* isolate by using *PelB* and *HlyA* secretion signals. *Appl Environ Microbiol* **77**, 4669–4675 (2011).
48. Bextine, B., Lauzon, C., Potter, S., Lampe, D. & Miller, T. A. Delivery of a genetically marked *Alcaligenes* sp. to the glassy-winged sharpshooter for use in a paratransgenic control strategy. *Curr Microbiol* **48**, 327–331 (2004).
49. Beard, C. B., Mason, P. W., Aksoy, S., Tesh, R. B. & Richards, F. F. Transformation of an insect symbiont and expression of a foreign gene in the Chagas' disease vector *Rhodnius prolixus*. *American Journal of Epidemiology* **46**, 195–200 (1992).
50. Durvasula, R. V. *et al.* Expression of a functional antibody fragment in the gut of *Rhodnius prolixus* via transgenic bacterial symbiont *Rhodococcus rhodnii*. *Med Vet Entomol* **13**, 115–119 (1999).
51. Wang, S. *et al.* Fighting malaria with engineered symbiotic bacteria from vector



- mosquitoes. *Proc Natl Acad Sci USA* **109**, 12734–12739 (2012).
52. Favia, G. *et al.* Bacteria of the genus *Asaia* stably associate with *Anopheles stephensi*, an Asian malarial mosquito vector. *Proc Natl Acad Sci USA* **104**, 9047–9051 (2007).
53. Hughes, G. L. *et al.* Identification of yeast associated with the planthopper, *Perkinsiella saccharicida*: potential applications for Fiji leaf gall control. *Curr Microbiol* **63**, 392–401 (2011).
54. Medina, F., Li, H., Vinson, S. B. & Coates, C. J. Genetic transformation of midgut bacteria from the Red Imported Fire Ant (*Solenopsis invicta*). *Curr Microbiol* **58**, 478–482 (2009).
55. Hurwitz, I., Hillesland, H., Fieck, A., Das, P. & Durvasula, R. The paratransgenic sand fly: a platform for control of *Leishmania* transmission. *Parasit Vectors* **4**, 82 (2011).
56. Pittman, G. W., Brumbley, S. M., Allsopp, P. G. & O'Neill, S. L. Assessment of gut bacteria for a paratransgenic approach to control *Dermolepida albobirtum* Larvae. *Appl Environ Microbiol* **74**, 4036–4043 (2008).
57. Tikhe, C. V., Martin, T. M., Howells, A., Delatte, J. & Husseneder, C. Assessment of genetically engineered *Trabulsiella odontotermis* as a 'Trojan Horse' for paratransgenesis in termites. *BMC Microbiol* 1–11 (2016). doi:10.1186/s12866-016-0822-4
58. Bextine, B., Lampe, D., Lauzon, C., Jackson, B. & Miller, T. A. Establishment of a genetically marked insect-derived symbiont in multiple host plants. *Curr Microbiol* **50**, 1–7 (2005).
59. Pontes, M. H. & Dale, C. Lambda red-mediated genetic modification of the insect endosymbiont *Sodalis glossinidius*. *Appl Environ Microbiol* **77**, 1918–1920 (2011).
60. Wang, S. *et al.* Driving mosquito refractoriness to *Plasmodium falciparum* with engineered symbiotic bacteria. *Science* **357**, 1399–1402 (2017).
61. Dotson, E. M., Plikaytis, B., Shinnick, T. M., Durvasula, R. V. & Beard, C. B. Transformation of *Rhodococcus rhodnii*, a symbiont of the Chagas disease vector *Rhodnius prolixus*, with integrative elements of the L1 mycobacteriophage. *Infect Genet Evol* **3**, 103–109 (2003).
62. Correa, M. A., Brackney, D. E. & Steven, B. Axenic *Aedes aegypti* develop without live bacteria, but exhibit delayed development and reduced oviposition. *bioRxiv* 264978 (2018). doi:10.1101/264978
63. Valzania, L. *et al.* Both living bacteria and eukaryotes in the mosquito gut promote growth of larvae. *PLoS Negl Trop Dis* **12**, e0006638 (2018).
64. Coon, K. L., Vogel, K. J., Brown, M. R. & Strand, M. R. Mosquitoes rely on their gut microbiota for development. *Mol Ecol* **23**, 2727–2739 (2014).
65. Kim, J. K. *et al.* Purine biosynthesis, biofilm formation, and persistence of an insect-microbe gut symbiosis. *Appl Environ Microbiol* **80**, 4374–4382 (2014).
66. Wang, H. H. *et al.* Programming cells by multiplex genome engineering and accelerated evolution. *Nature* **460**, 894–898 (2009).
67. Lindh, J. M., Borg-Karlson, A.-K. & Faye, I. Transstadial and horizontal transfer of bacteria within a colony of *Anopheles gambiae* (Diptera: Culicidae) and oviposition response to bacteria-containing water. *Acta Trop* **107**, 242–250 (2008).

68. Ribet, D. & Cossart, P. How bacterial pathogens colonize their hosts and invade deeper tissues. *Microbes Infect* **17**, 173–183 (2015).
69. Hall-Stoodley, L., Costerton, J. W. & Stoodley, P. Bacterial biofilms: from the natural environment to infectious diseases. *Nat Rev Micro* **2**, 95–108 (2004).
70. Ramirez, J. L. *et al.* *Chromobacterium* Csp\_P reduces malaria and dengue infection in vector mosquitoes and has entomopathogenic and in vitro anti-pathogen activities. *PLoS Pathog* **10**, e1004398 (2014).
71. Valzania, L., Coon, K. L., Vogel, K. J., Brown, M. R. & Strand, M. R. Hypoxia-induced transcription factor signaling is essential for larval growth of the mosquito *Aedes aegypti*. *Proc Natl Acad Sci USA* **115**, 457–465 (2018).
72. Burkhardt, N. Y. *et al.* Development of Shuttle Vectors for Transformation of Diverse Rickettsia Species. *PLoS ONE* **6**, e29511 (2011).
73. Chaverra-Rodriguez, D. *et al.* Targeted delivery of CRISPR-Cas9 ribonucleoprotein into arthropod ovaries for heritable germline gene editing. *Nat Commun* 1–11 (2018). doi:10.1038/s41467-018-05425-9
74. Li, M. *et al.* Germline Cas9 expression yields highly efficient genome engineering in a major worldwide disease vector, *Aedes aegypti*. *Proc Natl Acad Sci USA* **114**, E10540–E10549 (2017).
75. Labun, K., Montague, T. G., Gagnon, J. A., Thyme, S. B. & Valen, E. CHOPCHOP v2: a web tool for the next generation of CRISPR genome engineering. *Nucleic Acids Res* **44**, W272–6 (2016).
76. Trehan, A. *et al.* REPLACR-mutagenesis, a one-step method for site-directed mutagenesis by recombineering. *Sci Rep* **6**, 51–9 (2016).
77. O'Toole, G. A. & Kolter, R. Flagellar and twitching motility are necessary for *Pseudomonas aeruginosa* biofilm development. *Mol Microbiol* **30**, 295–304 (1998).
78. Kozlova, E. V., Khajanchi, B. K., Popov, V. L., Wen, J. & Chopra, A. K. Impact of QseBC system in c-di-GMP-dependent quorum sensing regulatory network in a clinical isolate SSU of *Aeromonas hydrophila*. *Microb. Pathog.* **53**, 115–124 (2012).

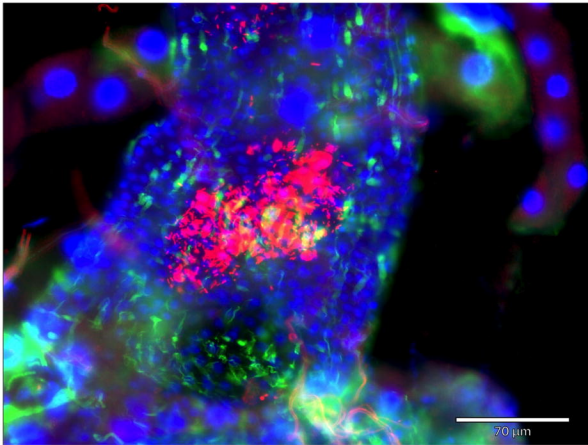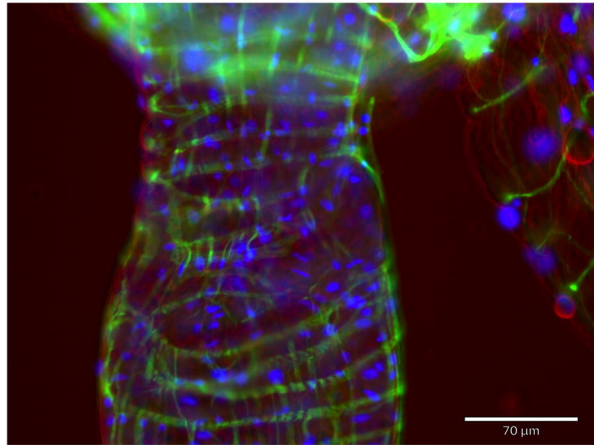



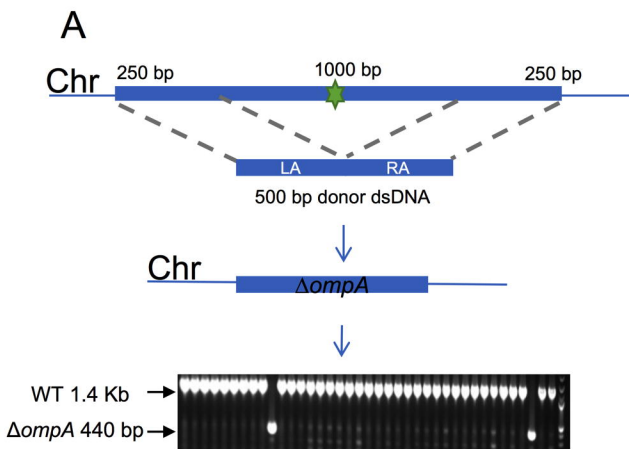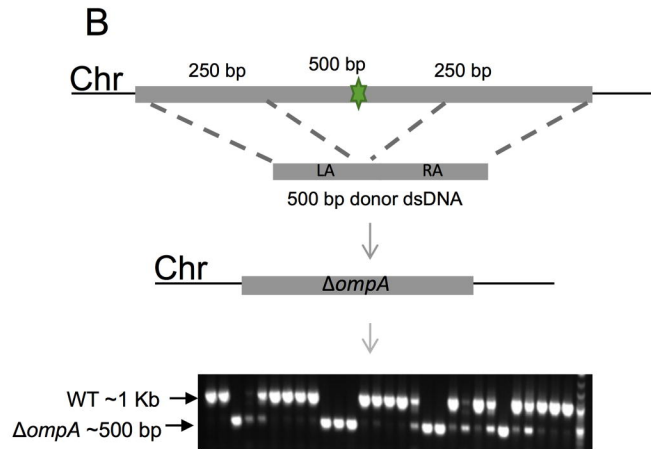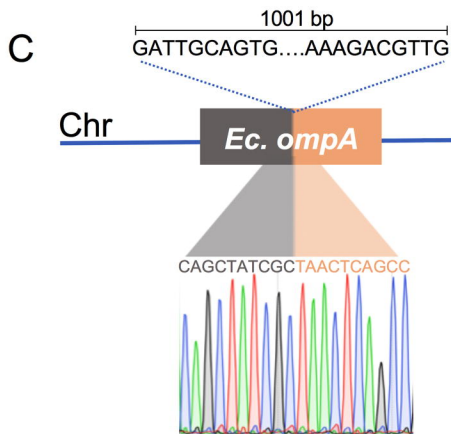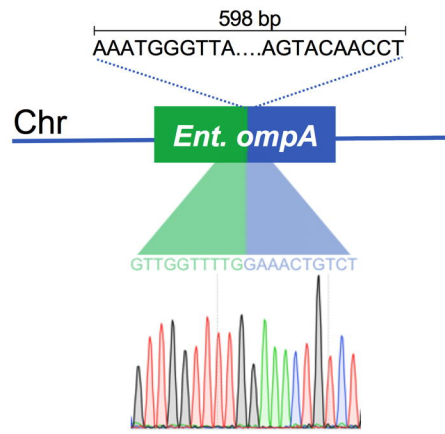

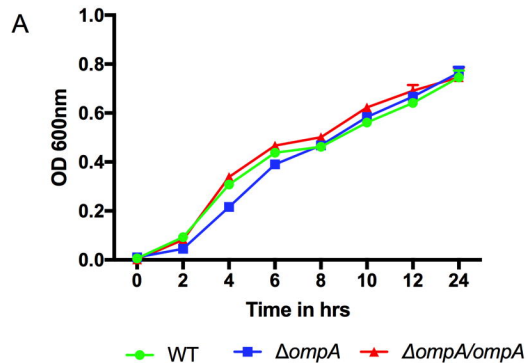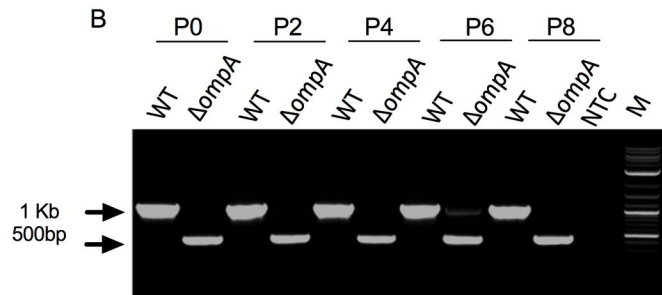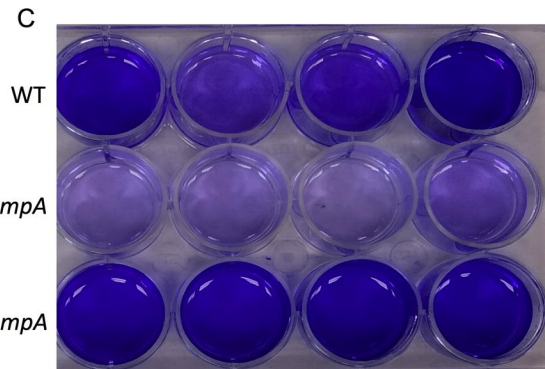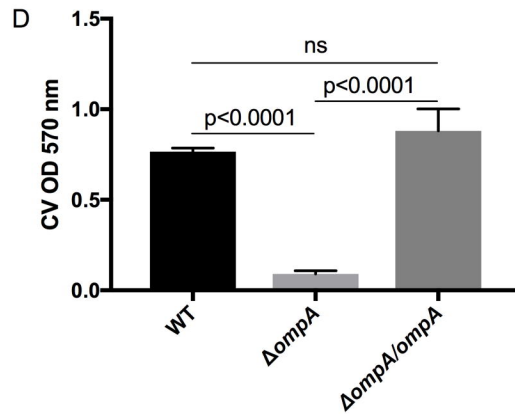

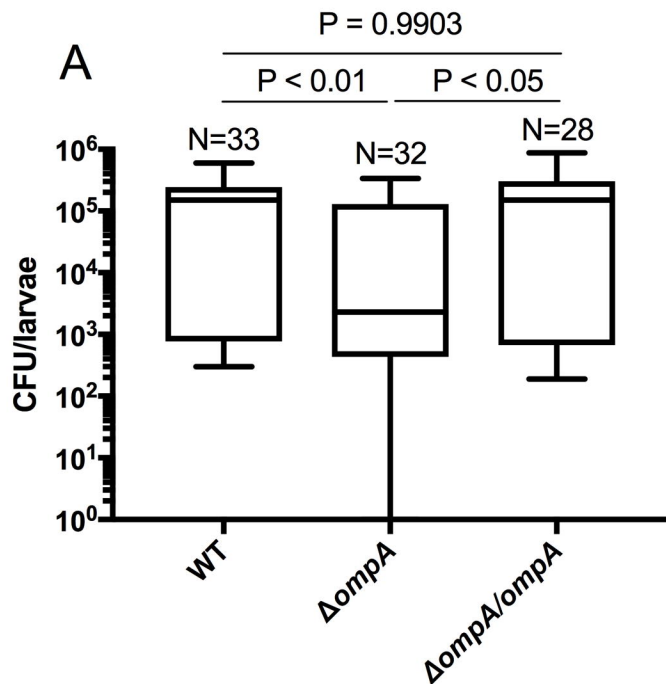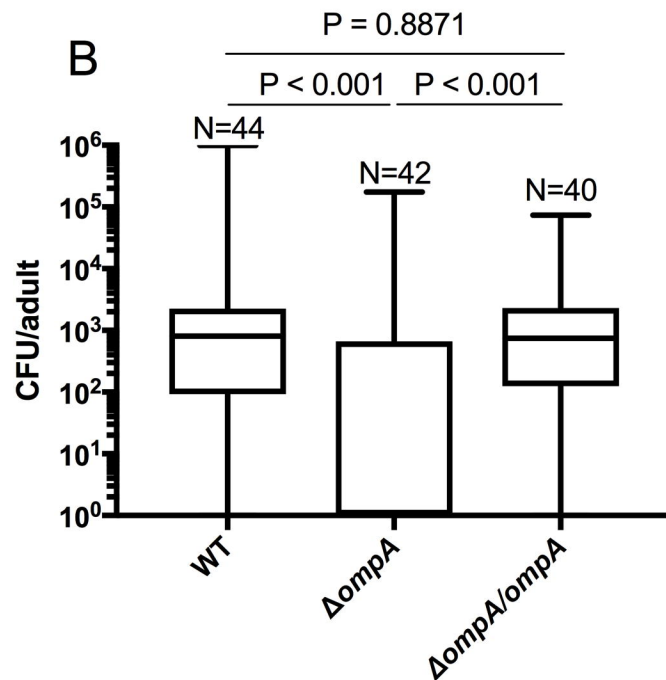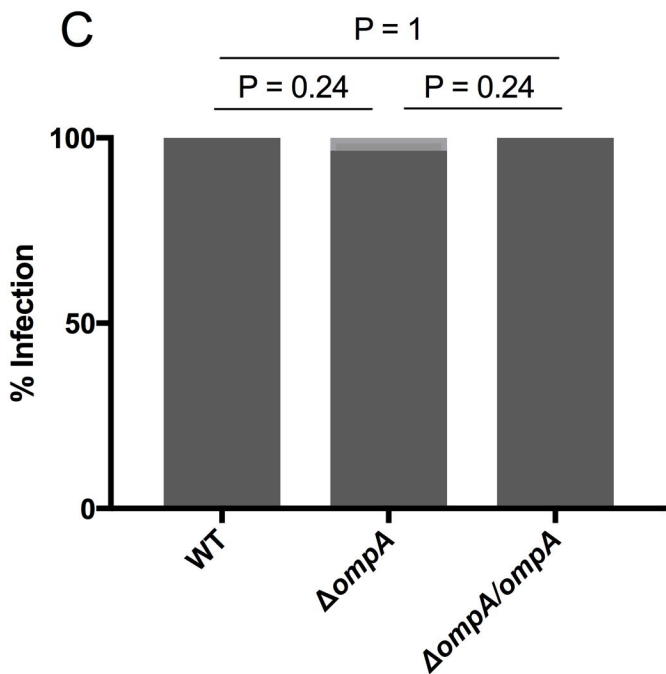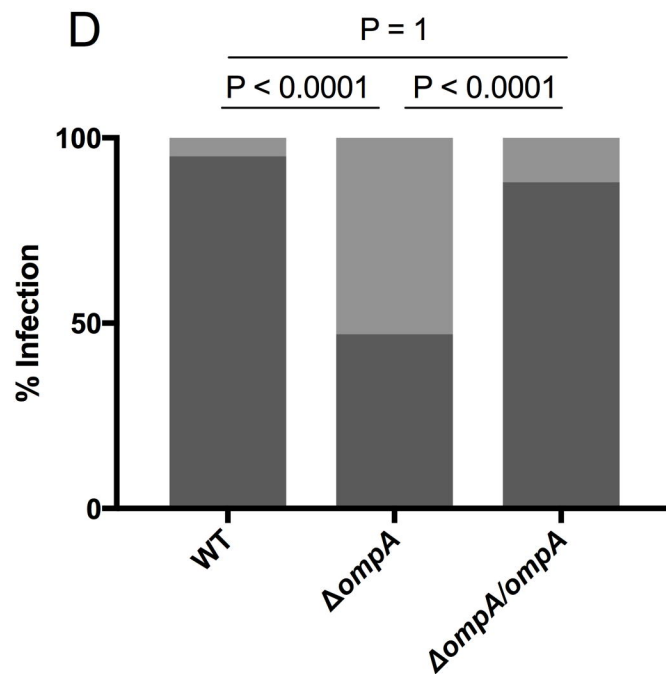

Uninfected

Infected

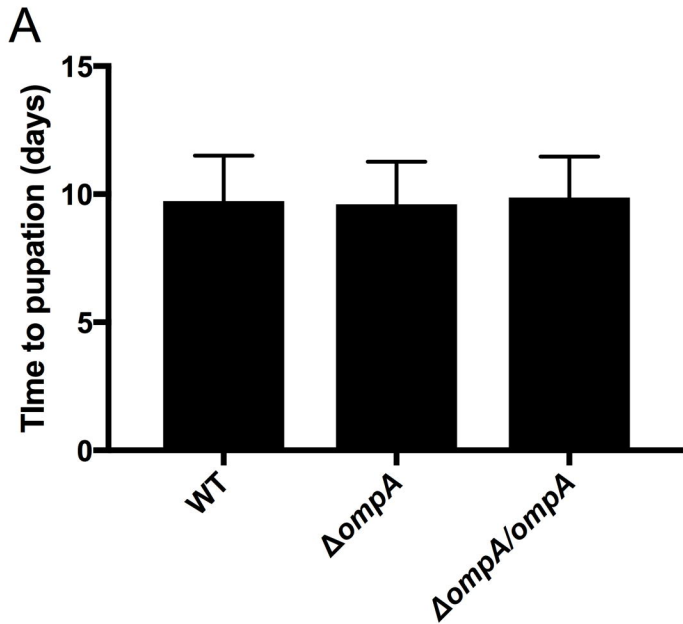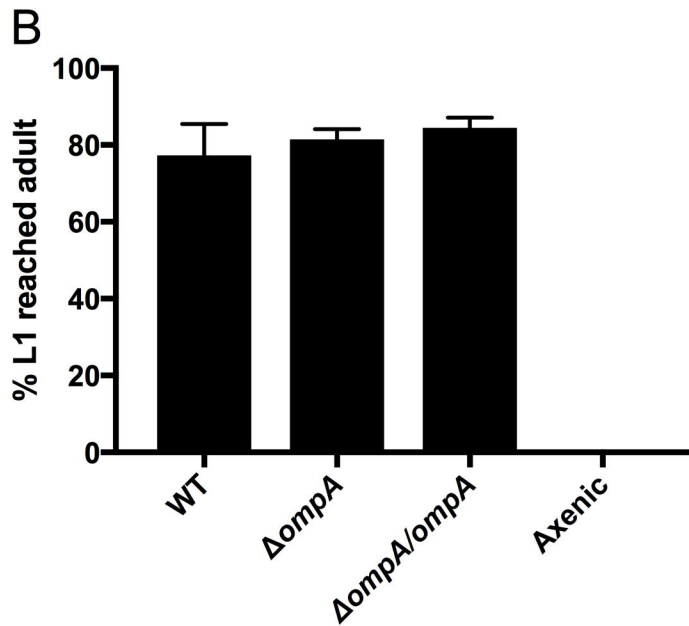

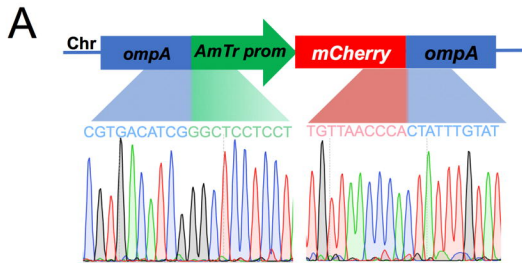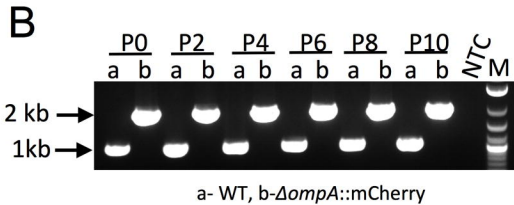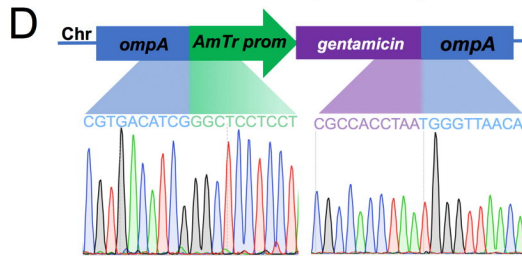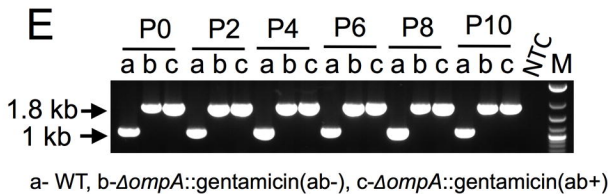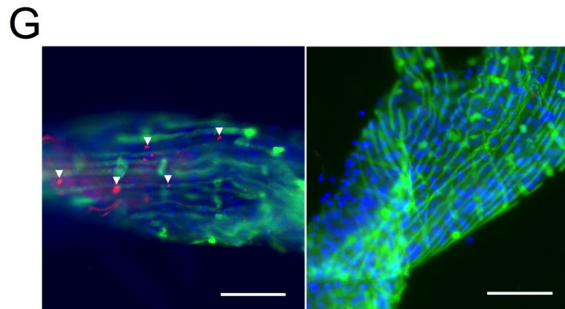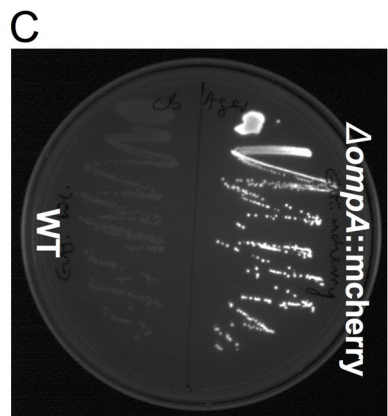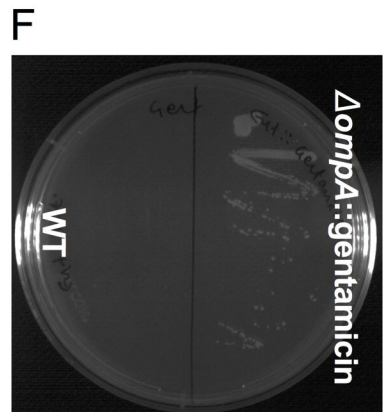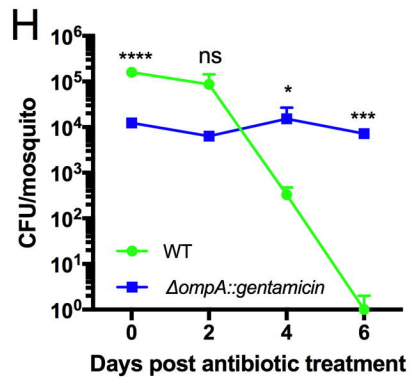

Source: http://biorxiv.org/content/10.1101/389957v2.full.pdf
