1 **CRISPR/Cas9-mediated gene deletion of the *ompA* gene in symbiotic**  
2 ***Enterobacter* impairs biofilm formation and reduces gut colonization of *Aedes***  
3 ***aegypti* mosquitoes**

4  
5 Shivanand Hegde<sup>1,4</sup>, Pornjarim Nilyanimit<sup>2</sup>, Elena Kozlova<sup>1</sup>, Hema P. Narra<sup>1</sup>, Sanjeev  
6 K. Sahni<sup>1</sup>, Grant L. Hughes<sup>3,4,#</sup>

7  
8 <sup>1</sup> Department of Pathology, University of Texas Medical Branch, Galveston, TX, USA.

9 <sup>2</sup> Center of Excellence in Clinical Virology, Chulalongkorn University, Bangkok,  
10 Thailand.

11 <sup>3</sup> Department of Pathology, Institute for Human Infections and Immunity, Center for  
12 Tropical Diseases, Center for Biodefense and Emerging Infectious Disease. University  
13 of Texas Medical Branch, Galveston, TX, USA.

14 <sup>4</sup> Current address: Department of Vector Biology and Department of Parasitology,  
15 Liverpool School of Tropical Medicine, Pembroke Place, Liverpool, UK.

16 #Corresponding author. Email: grant.hughes@lstm.ac.uk

17

18

19

20 Running head: CRISPR/Cas9 engineering of a gut bacterium.

21

## 22 **Abstract**

23 **Background:** Symbiotic bacteria are pervasive in mosquitoes and their presence can  
24 influence many host phenotypes that affect vectoral capacity. While it is evident that  
25 environmental and host genetic factors contribute in shaping the microbiome of  
26 mosquitoes, we have a poor understanding regarding how bacterial genetics affects  
27 colonization of the mosquito gut. The CRISPR/Cas9 gene editing system is a powerful  
28 tool to alter bacterial genomes facilitating investigations into host-microbe interactions  
29 but has yet to be applied to insect symbionts.

30 **Methodology/Principal Findings:** To investigate the role of bacterial factors in mosquito  
31 biology and in colonization of mosquitoes we used CRISPR/Cas9 gene editing system  
32 to mutate the outer membrane protein A (*ompA*) gene of an *Enterobacter* symbiont  
33 isolated from *Aedes* mosquitoes. The *ompA* mutant had an impaired ability to form  
34 biofilms and poorly infected *Ae. aegypti* when reared in a mono-association under  
35 gnotobiotic conditions. In adults the mutant had a significantly reduced infection  
36 prevalence compared to the wild type or complement strains, while no differences in  
37 prevalence were seen in larvae, suggesting bacterial genetic factors are particularly  
38 important for adult gut colonization. We also used the CRISPR/Cas9 system to integrate  
39 genes (antibiotic resistance and fluorescent markers) into these symbionts genome and  
40 demonstrated that these genes were functional in vitro and in vivo.

41 **Conclusions/Significance:** Our results shed insights onto the role of *ompA* gene in host-  
42 microbe interactions in *Ae. aegypti* and confirm that CRISPR/Cas9 gene editing can be  
43 employed for genetic manipulation of non-model gut microbes. The ability to use this  
44 technology for site-specific integration of genes into the symbiont will facilitate the

45 development of paratransgenic control strategies to interfere with arboviral pathogens  
46 such Chikungunya, dengue, Zika and Yellow fever viruses transmitted by *Aedes*  
47 mosquitoes.

48

#### 49 **Author summary**

50 Microbiota profoundly affect their host but few studies have investigated the role of  
51 bacterial genetics in host-microbe interactions in mosquitoes. Here we applied the  
52 CRISPR/Cas9 gene editing system to knock out a membrane protein in *Enterobacter*,  
53 which is a dominant member of the mosquito microbiome. The mutant strain lacked the  
54 capacity to form biofilms, infected larvae and adults at lower titers, and had a reduced  
55 prevalence in adults. The lower prevalence in adults, but not larvae, likely reflects the  
56 difference in the modes of bacterial acquisition from the larval water of these two life  
57 stages. Importantly from an applied perspective, we also demonstrated that this editing  
58 technology can be harnessed for site-specific integration of genes into the bacterial  
59 chromosome. In proof-of-principle studies we integrated either a fluorescent protein or  
60 gene conferring antibiotic resistance into the bacterial genome and showed these  
61 transgenes were functional in mosquitoes. The specificity, flexibility, and simplicity of  
62 this editing approach in non-model bacteria will be useful for developing novel symbiotic  
63 control strategies to control arthropod-borne disease.

64

65 **Keywords: CRISPR/Cas9, Gut microbe, Gut colonization, Biofilm,**  
66 **Paratransgenesis, Paratransgenic**

67 **Introduction.**

68 Mosquitoes harbor a community of microbes within their guts. In general, the gut-  
69 associated microbiome of mosquitoes tends to have low species richness but can differ  
70 greatly between individuals and habitats [1-8]. Importantly, these microbes can  
71 modulate many host phenotypes, several of which can influence vectorial capacity [9-  
72 11]. As such, it is imperative that we understand how the microbiome is acquired and  
73 maintained within mosquito vectors. While environmental factors unquestionably  
74 influences the mosquito microbiome composition and abundance [2-4, 8], studies are  
75 elucidating the role of microbial interactions[5, 7, 12, 13] and host genetic factors [14-  
76 18] in shaping the microbiome. However, we have a poor understanding of bacterial  
77 factors that influence colonization of the mosquito gut and this is likely an  
78 underappreciated force influencing host-microbe interactions in mosquitoes.

79

80 In other invertebrates, several bacterial genes have been implicated in gut colonization.  
81 For example, a genome wide screen exploiting transposon-sequencing found a suite of  
82 genes from the bacterium *Snodgrassella* involved in colonization of the honey bee gut  
83 [19]. These bacterial genes were classified into the broad categories of extracellular  
84 interactions, metabolism and stress response [19]. Knock out of a purine biosynthesis  
85 gene in *Burkholderia* impaired biofilm formation and reduced bacterial colonization rates  
86 in a bean bug [20]. Biofilm formation was also shown to play a role in virulence of  
87 pathogenic *Pseudomonas* in artificial infections of *Drosophila*, with strains that lacked  
88 the capacity to form biofilms being more virulence to the host, while a hyperbiofilm strain  
89 was less virulent than the WT strain [21]. In other blood feeding invertebrates, bacterial

90 genetics also appears critical for host colonization. Knockout of the type II secretion  
91 system in *Aeromonas veronii* reduced infection in *Hirudo verbena* leeches [22]. In  
92 Tsetse flies, the outer-membrane protein A (*ompA*) gene of *Sodalis glossinidius* is  
93 essential for symbiotic interactions [23]. *Sodalis* mutants lacking the *ompA* gene poorly  
94 colonized the fly gut compared to the wild type (WT) symbionts [23] and the mutant  
95 strain also had a reduced capacity to form biofilms [24]. Heterologous expression of the  
96 *ompA* gene from pathogenic *Escherichia coli* in *Sodalis* mutants induced mortality in the  
97 fly implicating this gene as a virulence factor in pathogenic bacteria [23]. Taken  
98 together, these studies suggest that bacterial genetic factors are critical for host  
99 colonization of invertebrates and that biofilm formation facilitates symbiotic associations  
100 in insects.

101  
102 In mosquitoes, few studies have investigated how bacterial genetics affect gut  
103 colonization. However, evidence from experimental evolution studies suggests bacterial  
104 genetics plays a critical role. In two separate studies, *Enterobacter* was selected for  
105 increased persistence in the gut of *Anopheles gambiae* mosquitoes, the major malaria  
106 vector in sub-Saharan Africa, by repeatedly infecting mosquitoes with strains that  
107 persisted in the gut for longer periods of time [25, 26]. Transcriptomics comparisons of  
108 effective and ineffective colonizers in liquid media identified 41 genes that were  
109 differentially expressed between these two strains [26], further implicating the  
110 importance of bacterial genetics in mosquito infection, however the role of these genes  
111 in colonization of the mosquito gut has not been resolved. In a separate study, *in vitro*  
112 screening of a transposon mutant library of *Enterobacter* identified a *waaL* gene mutant

113 that was insensitive to oxidative stress [27]. The *waaL* gene encodes an O antigen  
114 ligase which is needed for attachment of the O antigen to lipopolysaccharide and the  
115 mutant was found to have lower rates of colonization of the midguts of *Anopheles*  
116 mosquitoes [27].

117

118 Gene knockouts approaches in bacteria provide compelling evidence of the role of  
119 bacterial genes in host-microbe interactions [22-24, 27-29]. In general, most studies use  
120 transposon mutagenesis for gene knockout, which requires screening of the mutant  
121 library. A targeted gene knockout approach is highly desirable to investigate the  
122 functionality of bacterial genes in host-microbe interactions. In the past few years, the  
123 CRISPR/Cas9 gene editing system has been employed to modify bacterial genomes  
124 [30-32] . While much of the work has been done in model bacterial species [31-37],  
125 editing approaches have expanded into non-model bacterial systems [38-43]. Despite  
126 this expansion, the approach has been used less frequently used for host-associated  
127 microbes [39, 44], and rarely for arthropod symbionts. In the vector biology field, gene  
128 knockout approaches can be used to interrogate the role of bacterial genes responsible  
129 for host-microbe interactions, while the ability to integrate genes into the bacterial  
130 symbiont genome has great potential for applied paratransgenic control strategies [10,  
131 45-47]. Previously, manipulation of non-model symbionts that associate with insect  
132 vectors have has been accomplished by plasmid transformation [48-55] or stable  
133 transformation of the genome using transposons or integrative plasmids [56-63], but the  
134 use of CRISPR/Cas9 gene editing in insect gut symbionts has yet to be accomplished.  
135 For paratransgenic strategies, stable site-specific integration of transgenes into the

136 symbiont genome is critical, and as such, the application of CRISPR/Cas9 gene editing  
137 technology to non-model bacteria that associate with insect vectors will stimulate  
138 research in this field.

139

140 We therefore undertook studies to develop CRISPR/Cas9 genome editing approaches  
141 in an *Enterobacter* species isolated from *Aedes* mosquitoes. We used the Scarless  
142 Cas9 Assisted Recombineering (no-SCAR) method to disrupt the *ompA* gene of the  
143 non-model *Enterobacter* species [35]. After characterization of the mutant *in vitro*, we  
144 examined the role of the *ompA* gene in host-microbe interactions by re-infecting  
145 bacteria into mosquito in a mono-association. To demonstrate that the CRISPR/Cas9  
146 gene-editing system could be useful for applied symbiotic control approaches we  
147 inserted genes conferring antibiotic resistance or a fluorescent protein into the bacterial  
148 genome and re-infected the altered strains back into mosquitoes. Our result sheds  
149 insights into the role of the *ompA* gene in host-microbe interactions in *Ae. aegypti* and  
150 confirm that CRISPR/Cas9 gene editing can be a powerful tool for genetic manipulation  
151 of native gut-associated microbes of mosquitoes.

## 152 **Results**

### 153 ***Enterobacter* biofilm formation in *Ae. aegypti* guts**

154 Over the course of conducting mono-axenic infections in *Ae. aegypti* mosquitoes with  
155 an *Enterobacter* symbiont, we repeatedly observed a conglomeration of bacterial cells  
156 in the gut that was indicative of a biofilm (Figure 1, Figure S1 A-C). This formation of  
157 bacteria has a similar appearance to biofilms observed in the guts of other insects [21,  
158 24]. No bacteria were observed in the intestinal track of *Ae. aegypti* when infected with  
159 *E. coli* (Figure 1, S1 D-F), although as seen previously, infection with this bacterium  
160 enabled mosquito development [64]. We therefore examined the role of bacterial  
161 genetics in biofilm formation and host colonization of this gut-associated bacterium of  
162 *Aedes* mosquitoes. While several genes have been implicated in biofilm formation [21,  
163 24], we chose to knockout the *ompA* gene of *Enterobacter* given that this gene has  
164 been demonstrated to influence biofilm formation and gut colonization of *Sodalis* [23,  
165 24], an *Enterobacteriaceae* symbiont of Tsetse flies. We used the CRISRP/Cas9  
166 genome editing system to mutate the symbionts genome.

167

### 168 **Genome editing in *Enterobacter* bacteria isolated from mosquitoes.**

169 To edit the *Enterobacter* isolate that resides within the gut of *Aedes* mosquitoes, we  
170 employed the no-SCAR gene editing approach that had been developed in *E. coli* [35].  
171 To optimize the approach in our hands, we performed initial experiments in *E. coli* to  
172 delete a ~1 kb region of the *ompA* gene (Figure 2A). As the no-SCAR approach exploits  
173 the  $\lambda$ -Red recombineering system to repair double stranded breaks, we transformed  
174 bacteria with a double stranded DNA template that had regions of homology flanking the



175 gRNA site (250 bp for each arm). Using this approach, we successfully deleted a 1001  
176 bp fragment of the *ompA* gene. From the colonies we screened, we saw an editing at a  
177 frequency of 6.25% (N = 48) (Figure 2A). For *Enterobacter*, we altered our editing  
178 procedure to delete a 598 bp fragment from the *ompA* gene. This was done to enhance  
179 the efficiency of obtaining mutants [35] and accommodate the PAM site which was at a  
180 different location in the *ompA* gene in *Enterobacter*. Using a donor template designed  
181 for the *Enterobacter ompA* gene that had similar length flanking homology arms as the  
182 previous experiment done in *E. coli*, we obtained mutant knockouts at a rate of 32% (N  
183 = 50) (Figure 2B). For both bacterial species, Sanger sequencing across the integration  
184 site indicated the deletion occurred at the expected loci in the bacterial genome (Figure  
185 2C; S1 Appendix).

186

### 187 **Characterization of the *Enterobacter ompA* mutant.**

188 We quantified the growth rates of the  $\Delta ompA$  mutant in comparison to the WT  
189 *Enterobacter* and the  $\Delta ompA/ompA$  complement in liquid LB media. We saw minimal  
190 differences in the growth between the WT, the  $\Delta ompA$  mutant or the  $\Delta ompA/ompA$   
191 complement (Figure 3A). To examine the stability of the deletion, we subcultured the  
192  $\Delta ompA$  mutant on LB media for 10 generations and performed PCR to amplify across  
193 the deletion. At alternative generations PCR analysis indicated the deletion was present  
194 indicating genomic stability at this site (Figure 3B).

195

196 Previously, *ompA* has been shown to be important in biofilm formation as *Sodalis*  
197 deletion mutants were unable to form biofilms [24]. As such we characterized *in vitro*

198 biofilm formation using the crystal violet (CV) biofilm assay. After visual inspection, it  
199 was clear the  $\Delta ompA$  mutant had distinctly less biofilm deposition compared to either  
200 the WT or the  $\Delta ompA/ompA$  complement (Figure 3C), and after quantification and  
201 normalization to account for any difference in growth between the strains, biofilm  
202 formation was confirmed to be significantly different between the  $\Delta ompA$  mutant and the  
203 WT (Figure 3D; Tukey's multiple comparisons test,  $P < 0.0001$ ) or  $\Delta ompA/ompA$   
204 complement (Tukey's multiple comparisons test,  $P < 0.0001$ ), while there was no  
205 significant differences between the WT and the  $\Delta ompA/ompA$  complement (Tukey's  
206 multiple comparisons test  $P = 0.2$ ).

207

### 208 **The role of *ompA* gene in mosquito infection.**

209 To examine the importance of the *ompA* gene on bacterial colonization of mosquitoes,  
210 we infected *Ae. aegypti* mosquitoes in a mono-association under gnotobiotic conditions  
211 [64]. This infection method was used to avoid other gut-associated microbes influencing  
212 host colonization rates [7] and it also enable straightforward quantification of introduced  
213 bacteria by measuring colony forming units (CFUs). In larvae we saw a significant  
214 reduction in bacterial titer in the mutant compared to both the WT (Kruskal-Wallis test;  $P$   
215  $< 0.01$ ) and the  $\Delta ompA/ompA$  complement (Kruskal-Wallis test;  $P < 0.05$ ) (Figure 4A).  
216 Similarly, in adults, there was a significant reduction in bacterial infection in the  $\Delta ompA$   
217 mutant compare to either the WT or  $\Delta ompA/ompA$  complement (Kruskal-Wallis test;  $P <$   
218  $0.001$ ) (Figure 4B). While no significant changes were seen in the prevalence of  
219 infection (number of mosquitoes infected) in the larval stage (Figure 4C, Fisher's exact  
220 test; WT compared to  $\Delta ompA$   $P = 0.24$  and  $\Delta ompA$  compared to  $\Delta ompA/ompA$   $P =$

221 0.24), in adults, the prevalence of infection was significantly different (Figure 4D,  
222 Fisher's exact test; WT compared to  $\Delta ompA$   $P < 0.0001$  and  $\Delta ompA$  compared to  
223  $\Delta ompA/ompA$   $P < 0.0001$ ), with only 45% of adults infected by the  $\Delta ompA$  mutant  
224 compared to 95% and 88% by the WT and  $\Delta ompA/ompA$  complement, respectively. We  
225 also examined the growth rates of mosquitoes administered with the WT,  $\Delta ompA$   
226 mutant and  $\Delta ompA/ompA$  complement. No significant differences were seen in the time  
227 to pupation (Figure 5A) or percentage of first instar larvae that reached adulthood  
228 (Figure 5B) between any of the strains.

229

### 230 **Integration of genes into the *Enterobacter* chromosome.**

231 We undertook experiments to demonstrate the CRISPR/Cas9 gene-editing approaches  
232 can be used to integrate genes into the chromosome of non-model bacteria that  
233 associate with mosquitoes. We created two independent transgenic strains that had  
234 either, a gene encoding mCherry fluorescence or a gene encoding resistance to the  
235 antibiotic gentamicin, inserted into the bacterial chromosome. These genes were  
236 integrated into the genome using the same gRNA that was used for deletional  
237 mutagenesis (Table S1), and as such, these insertions also disrupted the *ompA* gene.  
238 Sequencing across the integration site indicated the insertion of these genes occurred  
239 within the *ompA* gene and thereby disrupted its function (Figure 6A and 6D). Continual  
240 subculturing was undertaken for both strains and molecular analysis indicated the  
241 stability of these lines for ten generations (Figure 6B and 6E). To demonstrate the  
242 integrated genes were functional, we observed expression of mCherry fluorescence and  
243 successfully cultured the strain containing gentamicin resistance on plates containing

244 the antibiotic (Figure 6C and 6F). Finally, we infected these transgenic strains into  
245 mosquitoes to demonstrate that these strains were able to colonize the mosquito gut  
246 and functionality of the integrated gene was confirmed by observing fluorescence or by  
247 rearing the *Enterobacter ompA::gentamicin* strain in mosquitoes administered sugar  
248 supplemented with gentamicin. Fluorescent bacteria were observed in the gut of  
249 mosquitoes while no signal was seen in controls (WT *Enterobacter* infected mosquitoes)  
250 (Figure 5G). The *Enterobacter ompA::gentamicin* was successfully rescued from  
251 mosquitoes reared on gentamicin and was seen to stably infect mosquitoes over time at  
252 a density of  $1 \times 10^4$  CFUs/mosquito. Consistent with our previous finding (Figure 4B), the  
253 WT bacteria initially infected mosquitoes at higher titers (T test; day 0  $P < 0.001$ ).  
254 However, at 4 days post infection (dpi), the total bacterial load of culturable microbes in  
255 mosquitoes supplemented with WT *Enterobacter* was significantly reduced when reared  
256 on sugar supplemented with antibiotic (T test; day 4  $P < 0.05$ ), and no CFUs were  
257 recovered after at 6 dpi (T test; day 6  $P < 0.001$ ) (Figure 6H).

258 **Discussion.**

259 We harnessed the CRISPR/Cas9 gene editing system to create knockout mutants in an  
260 *Enterobacter* gut symbiont of *Ae. aegypti* mosquitoes enabling us to examine the role of  
261 bacterial genetics, specifically the *ompA* gene, in biofilm formation and gut colonization.  
262 A deletion of the *ompA* gene of *Enterobacter* decreased bacterial colonization of the  
263 mosquito host at both the larval and adult stages after infection in a mono-association.  
264 Strikingly, we found this effect was most pronounced in adult mosquitoes with more  
265 than half of the mosquitoes not possessing any culturable mutants, while there was no  
266 difference in prevalence of infection between the mutant and WT bacteria in larvae. The  
267 reduced prevalence of mutant bacteria in adults likely reflects differences in microbial  
268 colonization of each mosquito life stage. Larvae are continually subjected to bacteria in  
269 the larval water habitat while adults only have a short time frame to acquire bacteria  
270 from the aquatic environment immediately after eclosion, when they are thought to  
271 imbibe a small amount of larval water which seeds the gut with microbiota [65]. Our data  
272 shows greater variation in colonization of the adult stage between the mutant and WT  
273 strains, indicating that the *ompA* gene, and potentially bacterial factors in general, may  
274 be critical for colonization of the adult gut. These findings are also consistent with other  
275 sequence-based studies, that indicate adult stages have greater variability in species  
276 composition of their microbiota, while the microbiome of immature stages is similar to  
277 the microbiota in larval water habitat [2-5, 8, 66].

278

279 Overall, our findings are similar to studies done in Tsetse flies whereby an *ompA* mutant  
280 of *Sodalis*, an *Enterobacteriaceae* symbiont, has impaired biofilm formation and

281 reduced colonization rates [23, 24]. These studies, in conjunction with our work,  
282 suggests that the *ompA* gene is imperative for symbiotic associations within dipterans. It  
283 also suggests that biofilm formation may be a strategy employed by bacteria to colonize  
284 the gut of insects. In pathogenic infections in mammals, biofilms enable bacteria to  
285 colonize new niches, promote infection and are associated with virulence [67] . Although  
286 less is known regarding the importance of biofilm formation in insects, in an artificial  
287 *Pseudomonas-Drosophila* infection model, biofilm formation was associated with  
288 virulence and host survival [21]. In a natural symbiotic association between bean bugs  
289 and *Burkholderia*, disruption of a purine biosynthesis gene in the bacterium also reduce  
290 biofilm formation and colonization of the insect [20] In mosquitoes, gut biofilm formation  
291 could also have implications for vector competence as *Chromobacterium*, which was  
292 isolated from *Aedes* mosquitoes, produced molecules that inhibited dengue virus only  
293 when grown *in vitro* as a biofilm but not when grown in a planktonic state [68]. Despite  
294 this, it was unknown if biofilm formation occurred *in vivo* in the mosquito [68]. Our data  
295 provide evidence that biofilms occur within the gut of mosquitoes and facilitate host  
296 colonization.

297

298 While we have shown that the *ompA* gene of *Enterobacter* is important for host  
299 colonization, we see no evidence that deletion of this gene alters mosquito development  
300 or growth rates. This is in contrast to the *Riptortus-Burkholderia* symbiosis whereby  
301 mutation of the *purT* gene in *Burkholderia* resulted in reduced growth rates and  
302 reduction in body weight of the host compared to insects that were infected with the WT  
303 bacterium [20]. The difference in our study to the findings in the *Riptortus-Burkholderia*

304 symbiosis could be related to different requirements of the bean bug compared to the  
305 mosquito host as well as the different genes mutated in the symbionts. Our findings are  
306 consistent with a previous study in *Ae. aegypti* whereby an *ompA* mutant of *E. coli* did  
307 not influence growth reared in a mono-association [69]. Using a similar gnotobiotic  
308 system that exploits the ability to sterilize mosquito eggs and rescue development by  
309 nutritional supplementation, several recent reports describe approaches to create  
310 bacteria-free mosquitoes [69, 70]. Here, we reared mosquitoes in a mono-association  
311 where they were only subjected to *Enterobacter*. However, more than half the adult  
312 mosquitoes inoculated with the  $\Delta ompA$  mutant were not infected by bacteria, as  
313 evidenced by the inability to culture bacteria from these insects. Nevertheless, these  
314 mosquitoes had similar development and growth rates compared to mosquito  
315 possessing WT bacteria. The use of mutant bacteria that rescue development but have  
316 an impaired ability to colonize mosquitoes may provide a simple means to create axenic  
317 adult mosquitoes.

318

319 CRISPR/Cas9 gene editing has revolutionized genetic approaches in model and non-  
320 model bacteria [31-43]. However, there has been limited use of this technology in  
321 symbiotic microbes of arthropods. Here we demonstrate that editing approaches  
322 functional in *E. coli* can be easily applied with minimal adaptation to phylogenetically  
323 related symbiotic bacteria that associate within the guts of mosquitoes. The application  
324 of CRISPR/Cas9 genome editing to gut-associated bacteria of mosquitoes has  
325 significant applied potential. Paratransgenesis strategies are being evaluated in a range  
326 of medical and agricultural systems to mitigate pathogen transmission from insect

327 vectors, however, most approaches engineer symbionts by plasmid transformation [49-  
328 55, 71] and where genome integration has been accomplished in symbionts [58-61], it  
329 has often been done with technologies that did not allow for site specific integration.  
330 Paratransgenic approaches suitable for use in the field will need to stably integrate  
331 genes into the bacterial genome in a manner that does not compromise bacterial  
332 fitness. Exploiting the flexibility and specificity of the CRISPR/Cas9 to integrate genes in  
333 intergenic regions of the bacterial chromosome will undoubtedly be beneficial for these  
334 applied approaches.

335

336 In summary, we have demonstrated that the CRISPR/Cas9 gene editing system can be  
337 applied to symbiotic bacteria that associate with eukaryotic hosts to interrogate the role  
338 of bacterial genes in host-microbe associations. We created knockout and knockin  
339 mutants by deleting and disrupting the *ompA* gene of *Enterobacter*. The knockout  
340 mutant displayed a reduced ability to form biofilms and colonize the gut of *Ae. aegypti*  
341 mosquitoes in a mono-association, demonstrating bacterial genetic factors are  
342 important determinants that influence colonization of mosquito guts. *Aedes* mosquitoes  
343 are becoming powerful systems to investigate the genetics of host-microbe interactions  
344 given the scientific community has simple and efficient approaches to alter both the  
345 microbes (this study) and mosquito host genome [72, 73] at their disposal, as well as  
346 methods to create mono-associated mosquito lines[7, 64]. Finally, rapid, efficient, and  
347 site specific gene editing approaches for gut bacteria that associate with mosquitoes will  
348 facilitate the development of novel paratransgenic approaches to control arthropod-  
349 borne disease [57].



## 350 **Experimental procedures**

351 **Bacterial and mosquito strains.** *E. coli* BL21(DE3) (NEB) and an *Enterobacter* strain  
352 previous isolated from a lab-reared colony of *Ae. albopictus* (Galveston) mosquitoes [7]  
353 were used in this study. Cultures were grown in liquid LB media at 37°C with the  
354 appropriate antibiotic unless stated otherwise. Mosquitoes were reared in the UTMB  
355 insectary under conventional conditions or in mono-associations (described below).

356

357 **CRISPR gene editing.** Editing the *ompA* gene of *E. coli* and *Enterobacter* was  
358 complete as described in Reisch and Prather [35]. The protospacer sequence for the  
359 *ompA* gene was designed using the CHOPCHOP [74, 75], and cloned into pKDsgRNA-  
360 ack plasmid [35] directly upstream of gRNA scaffold using REPLACR mutagenesis  
361 protocol [76]. Two protospacer sequences were designed for each gene and the one  
362 which had lower escape rate after plating with or without aTC (S1 Table). The plasmids  
363 were acquired from Addgene (S2 Table; Addgene plasmid 62655 and 62654). The  
364 resulting plasmids pKDsgRNA-Ec-*ompA* and pKDsgRNA-Ent-*ompA* were Sanger  
365 sequenced to confirm insertion of protospacer sequence. These plasmids were then  
366 transformed into either *E. coli* or *Enterobacter* containing the pCas9-CR4 plasmid.  
367 Transformants were selected at 30°C on LB agar plate containing spectinomycin (50  
368 µg/mL), chloramphenicol (34 µg/mL), and with or without anhydrotetracycline (aTC) at  
369 100ng/mL. Colonies from the –aTC plate were grown overnight in LB broth with the  
370 appropriate antibiotic at 30°C. A 1:100 diluted overnight culture was (grown until 0.4  
371 OD<sub>600</sub>) supplemented with 1.2% arabinose to induce the expression of λ-Red  
372 recombinase. Cells were then transformed with 1-1.5 µg of double stranded donor DNA

373 that flanked the PAM site for homologous recombination. Donor DNA was created by  
374 either PCR amplification or by gene synthesis (Genewiz). Regardless of the method of  
375 construction, each donor had flanking regions of 250 bp homologous to the target DNA.  
376 The resulting colonies were screened for mutations by colony PCR with primers flanking  
377 the integration site and positive clones were Sanger sequenced (S3 Table). Positive  
378 colonies were grown in LB broth and genomic DNA was isolated. For further validation,  
379 the flanking regions of deletion or insertions were amplified and the PCR product  
380 Sanger sequenced.

381

382 **Stability of insertion.** The stability of the knockout  $\Delta ompA$  mutant and the knockin  
383  $ompA::gentamicin$  and  $ompA::mCherry$  strains was assessed in LB medium. The  
384  $ompA::mCherry$  and knockout  $\Delta ompA$  mutant cultures were grown for 10 passages in  
385 LB broth. At each passage 40  $\mu$ l of culture was transferred into 4ml fresh LB medium.  
386 The  $ompA::gentamicin$  strain was grown with or without gentamicin (50  $\mu$ g/mL).  
387 Genomic DNA was isolated from the 0, 2, 4, 6, 8 and 10<sup>th</sup> subculture and PCR that  
388 amplified across the integration site was performed.

389

390 **Complementation of *ompA* mutant.** Functional rescue of the *ompA* mutation was  
391 achieved by complementing the mutant with the WT gene. The WT *ompA* gene was  
392 amplified from *Enterobacter* genomic DNA and cloned into the pRAM-mCherry vector<sup>7</sup>  
393 and thereby creating pRAM-mCherry-*Ent-OmpA*. The Sanger sequence-verified  
394 plasmid was transformed into the  $\Delta ompA$  mutant, thereby generating the  $\Delta ompA/ompA$

395 complement strain. Colonies that acquired the plasmid were selected on LB plates  
396 containing kanamycin (50 µg/mL).

397

398 ***In vitro* characterization of *Enterobacter* strains.** To assess the impact of the gene  
399 deletion on bacterial growth the WT,  $\Delta ompA$  mutant and  $\Delta ompA/ompA$  complement  
400 were grown in LB broth and the density of bacteria (OD<sub>600</sub>) was quantified by  
401 spectrophotometer. A 1:100 dilution of an overnight culture was inoculated into a 5 ml  
402 LB broth in 50 ml tube and incubated at 37°C for 24 hrs. At 2, 4, 6, 8, 10, 12 and 24  
403 hours growth was recorded at OD<sub>600</sub>. The biofilm assay was performed as described  
404 previously [77, 78]. Briefly, biofilm formation by *Enterobacter* strains was quantified on  
405 polystyrene microtiter plates after 72 h of incubation at 37°C by CV staining. Three  
406 independent experiments were performed, and the data were represented as CV OD<sub>570</sub>  
407 after normalizing by CFUs.

408

409 **Mosquito infections.** Mono-association in *Ae. aegypti* mosquitoes were done using  
410 gnotobiotic infection procedure [7, 64],+ with slight modifications. Briefly, mosquito eggs  
411 were sterilized for 5 min in 70% ethanol, 3 min 3% bleach+0.01% Coverage Plus NPD  
412 (Steris Corp.), 5 min in 70% ethanol then rinsed three times in sterile water. Eggs were  
413 vacuumed hatched for 30-45 min and left overnight at room temperature to hatch any  
414 remaining eggs. Exactly twenty L1 larvae were transferred to T175 flask containing 60  
415 ml of sterile water and fed on alternative days with 60 µl of fish food (1 µg/µl). Larvae  
416 were inoculated with 1x10<sup>7</sup>/ml of either the WT *Enterobacter*, the  $\Delta ompA$  mutant or the  
417  $\Delta ompA/ompA$  complement. The WT and  $\Delta ompA$  strains were transformed with the

418 pRAM-mCherry plasmid that conferred resistance to kanamycin (but did not possess a  
419 functional *ompA* gene). L4 larvae were collected, washed three times with 1X PBS, and  
420 then homogenized in 500  $\mu$ l of 1X PBS and 50  $\mu$ l of homogenate was plated on LB agar  
421 containing 50  $\mu$ g/mL kanamycin. Similarly, adult mosquitoes were collected 3-4 days  
422 post emergence and bacterial infection was quantified in the same manner as larvae. In  
423 order to assess the growth of the mosquitoes, time to pupation and growth rate were  
424 observed. Time to pupation was determined by quantifying the number of pupae each  
425 day post hatching, while survival to adulthood was calculated by quantifying the number  
426 of L1 larvae that reached adulthood. The experiment was repeated three times.

427

428 Knock-in mutants were administered to adult *Ae. aegypti* in a sugar meal. Three to four  
429 day old mosquitoes were fed with  $1 \times 10^7$  of WT or the  $\Delta ompA::gentamicin$  strain for  
430 three days in 10% sucrose solution. After three days, mosquitoes were either  
431 administered sugar supplemented with gentamicin (50  $\mu$ g/mL) or sugar without  
432 antibiotic. CFUs were determined at days 0, 2, 4, and 6 dpi by plating homogenized  
433 mosquitoes (N=10) on LB agar. Similarly, the  $\Delta ompA::mCherry$  and WT *Enterobacter*  
434 were fed to mosquitoes and midguts were dissected to assess the colonization of  
435 bacteria in the tissue. For visualization of bacteria, midguts were fixed in 1%  
436 paraformaldehyde (PFA) in 1X PBS for 30 minutes and permeabilized with 0.01% Triton  
437 X-100 in 1X PBS for 20 min. The tissues were stained with 1:250 diluted Phalloidin  
438 (Sigma) for 20 minutes and samples were washed twice with 1X PBS for 10 minutes.  
439 Finally, midguts were then stained with 1:500 diluted DAPI (Invitrogen) for 10 min.

440 Samples were transferred to slides and mounted with ProLong™ Gold Antifade  
441 (Invitrogen). The slides were observed under Revolve FL (ECHOLAB).

442

#### 443 **Acknowledgements.**

444 We would like to thank the UTMB insectary core for providing mosquitoes. GLH was  
445 supported by NIH grants (R21AI138074, R21AI124452 and R21AI129507), a University  
446 of Texas Rising Star award, the Western Gulf Center of Excellence for Vector-borne  
447 Diseases (CDC grant CK17-005), the Robert J. and Helen Kleberg Foundation and the  
448 Gulf Coast Consortia. This work was also supported by a James W. McLaughlin  
449 postdoctoral fellowship at the University of Texas Medical Branch to SH and a Dutsadi  
450 Piphat Scholarship and Thailand Research Chair Grant from NSTDA (p-15-50004) to  
451 PN. We also wish to thank Dr Ulrike Munderloh (University of Minnesota) for the kind  
452 gift of the pRAM plasmid.

453

#### 454 **Competing interests.**

455 The authors declare no competing interests.

456

457 **Figure legends.**

458

459 **Figure 1. Midgut infection of *Enterobacter* and *E. coli* in mono-associations of**  
460 ***Aedes* mosquitoes.** *Enterobacter* forms a biofilm in the gut of *Aedes aegypti*  
461 mosquitoes (left) while no bacteria were observed in the gut of mosquitoes reared with  
462 *E. coli* under gnotobiotic conditions (right). Bacteria possessed a plasmid expressing  
463 mCherry. Blue – host nuclei. Green – host actin cytoskeleton stained with phalloidin.  
464 The scale bar is 70  $\mu$ m.

465

466 **Figure 2. CRISPR/Cas9 genome editing in bacteria.** A schematic of the editing  
467 approach and screening of putative mutants in *E. coli* (A) and *Enterobacter* (B). A ~1kb  
468 fragment of *E. coli* BL21(DE3) was deleted using no-SCAR protocol. The 250 bp of left  
469 arm (LA) and right arm (RA) was assembled to generate 500 bp donor DNA. The  
470 transformants were screened via colony PCR with primers binding in regions flanking  
471 the deletion. Similar to strategy employed in *E. coli*, knockout of the *ompA* gene from  
472 *Enterobacter* isolated from the mosquito gut was created by deleting the 598 bp  
473 fragment. The grayed area indicates the PAM site in the *ompA* gene and arrow shows  
474 cleavage site in the genome. (C) The sequence of the *ompA* mutation in *E. coli* and  
475 *Enterobacter* was confirmed by Sanger sequencing. The sequence above the gene  
476 within the dotted line has been deleted. The chromatogram shows the 10 bp flanking  
477 the deletion.

478

479 **Figure 3. In vitro characterization of the *ompA* mutation.** The *Enterobacter*  $\Delta ompA$   
480 mutant had a similar growth rate compared to both the WT and the  $\Delta ompA/ompA$   
481 complement in liquid LB media (A). The stability of mutant was evaluated *in vitro* by  
482 continuous subculturing in LB medium (B). Genomic DNA of alternative subcultures was  
483 used as template for PCR using gene specific primers that amplified across the  
484 deletion. Two separate gel images were merged to create the figure 2B. Passage 8 was  
485 run on a separate gel to passages 0 – 6. Biofilm formation was assessed using the CV  
486 biofilm assay for the WT,  $\Delta ompA$  mutant and the  $\Delta ompA/ompA$  complement (C).  
487 Quantification of the relative biofilm formation normalized by the number of bacteria per  
488 well (D).

489

490 **Figure 4. The  $\Delta ompA$  mutant poorly infected mosquitoes.** Infection of *Enterobacter*  
491 strains (WT,  $\Delta ompA$  mutant and  $\Delta ompA/ompA$  complement) reared in a mono-  
492 association using a gnotobiotic rearing approach for larvae (A) and adults (B). L4 and 3-  
493 4 days post emergence adults were screened for bacterial load by plating on LB media  
494 to quantify the bacteria. The prevalence of infection (number of mosquitoes infected)  
495 between the treatments was calculated comparing number of infected to uninfected  
496 larvae (C) or adults (D).

497

498 **Figure 5. The  $\Delta ompA$  mutant does not affect growth rates or development of**  
499 **mosquitoes.** The growth rate (time to pupation) (A) and development (percentage of L1  
500 larvae to reach adulthood) (B) was observed in mosquitoes infected with *Enterobacter*

501 strains (WT,  $\Delta ompA$  mutant and  $\Delta ompA/ompA$  complement) reared in a mono-  
502 association.

503

504 **Figure 6. Integration of mCherry and gentamicin into the *Enterobacter* genome.**

505 Sanger sequence across the integration site, stability of the inserted gene and *in vitro*  
506 expression of the inserted gene for the  $\Delta ompA::mCherry$  (A-C) and the  $\Delta ompA::$   
507 gentamicin (D-F) strains. The chromatogram shows the sequence spanning the inserted  
508 sites. Strains were continually subcultured for 10 passages and PCR was done to  
509 examine the stability of the insert (B;  $\Delta ompA::mCherry$  plus WT; E  $\Delta ompA::gentamicin$   
510 passaged with (ab+) or without (ab-) gentamicin plus WT). mCherry fluorescence or  
511 ability to grow on selective media containing gentamicin confirmed the expression of the  
512 transgene *in vitro*. Mosquitoes were inoculated with the *Enterobacter* strains to confirm  
513 expression of the transgene *in vivo*. Dissected midgut infected with  $\Delta ompA::mCherry$   
514 (left) or negative control (right; WT bacteria without expression plasmid) (G). Midguts  
515 were stained with phalloidin (green) and DAPI (blue). The scale bar is 30  $\mu$ M. The WT  
516 and  $\Delta ompA::gentamicin$  *Enterobacter* strains were fed to adult mosquitoes for 3 days in  
517 a sugar meal before gentamicin was administered to mosquitoes in a sugar meal (H).  
518 Mosquitoes were collected every second day and CFUs assessed. Pairwise  
519 comparisons were conducted at each time point using a T test (\* -  $P < 0.05$ , \*\*\*  $P <$   
520  $0.001$ , \*\*\*\*  $P < 0.0001$ ).

521

522 **S1. Figure. Midgut infection of *Enterobacter* and *E. coli* in mono-associations of**

523 ***Aedes* mosquitoes.** Different gut tissue locations showing the conglomeration of



524 bacterial cells when infected in mono-association in *Aedes* mosquitoes with  
525 *Enterobacter* (A-C). However, infection of *E. coli* did not show any infection in the gut of  
526 the mosquitoes (D-F). The pictures were taken from different field of view of the gut  
527 dissected from different mosquitoes.  
528  
529

530 **References.**

- 531 1. Osei-Poku J, Mbogo CM, Palmer WJ, Jiggins FM. Deep sequencing reveals  
532 extensive variation in the gut microbiota of wild mosquitoes from Kenya. *Molecular*  
533 *Ecology*. 2012;21(20):5138-50. doi: 10.1111/j.1365-294X.2012.05759.x.
- 534 2. Boissière A, Tchioffo MT, Bachar D, Abate L, Marie A, Nsango SE, et al. Midgut  
535 microbiota of the malaria mosquito vector *Anopheles gambiae* and interactions with  
536 *Plasmodium falciparum* infection. *PLoS Pathogens*. 2012;8(5):e1002742. doi:  
537 10.1371/journal.ppat.1002742.
- 538 3. David MR, Santos LMBD, Vicente ACP, Maciel-de-Freitas R. Effects of  
539 environment, dietary regime and ageing on the dengue vector microbiota: evidence of a  
540 core microbiota throughout *Aedes aegypti* lifespan. *Memórias do Instituto Oswaldo*  
541 *Cruz*. 2016;111(9):577-87. doi: 10.1590/0074-02760160238.
- 542 4. Muturi EJ, Kim C-H, Bara J, Bach EM, Siddappaji MH. *Culex pipiens* and *Culex*  
543 *restuans* mosquitoes harbor distinct microbiota dominated by few bacterial taxa.  
544 *Parasites & Vectors*. 2016;9(1):18. doi: 10.1186/s13071-016-1299-6.
- 545 5. Hughes GL, Dodson BL, Johnson RM, Murdock CC, Tsujimoto H, Suzuki Y, et al.  
546 Native microbiome impedes vertical transmission of *Wolbachia* in *Anopheles*  
547 mosquitoes. *Proceedings of the National Academy of Sciences of the United States of*  
548 *America*. 2014;111(34):12498-503. doi: 10.1073/pnas.1408888111.
- 549 6. Coon KL, Brown MR, Strand MR. Mosquitoes host communities of bacteria that  
550 are essential for development but vary greatly between local habitats. *Molecular*  
551 *Ecology*. 2016;25(22):5806-26. doi: 10.1111/mec.13877.

- 552 7. Hegde S, Khanipov K, Albayrak L, Golovko G, Pimenova M, Saldaña MA, et al.  
553 Microbiome interaction networks and community structure from laboratory-reared and  
554 field-collected *Aedes aegypti*, *Aedes albopictus*, and *Culex quinquefasciatus* mosquito  
555 vectors. *Frontiers in Microbiology*. 2018;9:715. doi: 10.3389/fmicb.2018.02160.
- 556 8. Wang Y, Gilbreath TM, Kukutla P, Yan G, Xu J. Dynamic gut microbiome across  
557 life history of the malaria mosquito *Anopheles gambiae* in Kenya. *PLoS ONE*.  
558 2011;6(9):e24767. doi: 10.1371/journal.pone.0024767.
- 559 9. Weiss BL, Aksoy S. Microbiome influences on insect host vector competence.  
560 *Trends in Parasitology*. 2011;27(11):514-22. doi: 10.1016/j.pt.2011.05.001.
- 561 10. Saldaña MA, Hegde S, Hughes GL. Microbial control of arthropod-borne disease.  
562 *Memórias do Instituto Oswaldo Cruz*. 2017;112(2):81-93. doi: 10.1590/0074-  
563 02760160373.
- 564 11. Hegde S, Rasgon JL, Hughes GL. The microbiome modulates arbovirus  
565 transmission in mosquitoes. *Current Opinion in Virology*. 2015;15:97-102. doi:  
566 10.1016/j.coviro.2015.08.011.
- 567 12. Audsley MD, Ye YH, McGraw EA. The microbiome composition of *Aedes aegypti*  
568 is not critical for *Wolbachia*-mediated inhibition of dengue virus. *PLoS Neglected*  
569 *Tropical Diseases*. 2017;11(3):e0005426. doi: 10.1371/journal.pntd.0005426.
- 570 13. Muturi EJ, Bara JJ, Rooney AP, Hansen AK. Midgut fungal and bacterial  
571 microbiota of *Aedes triseriatus* and *Aedes japonicus* shift in response to La-Crosse  
572 virus infection. *Molecular Ecology*. 2016;25(16):4075-90. doi: 10.1111/mec.13741.

- 573 14. Kumar S, Molina-Cruz A, Gupta L, Rodrigues J, Barillas-Mury C. A  
574 peroxidase/dual oxidase system modulates midgut epithelial immunity in *Anopheles*  
575 *gambiae*. *Science*. 2010;327(5973):1644-8. doi: 10.1126/science.1184008.
- 576 15. Pang X, Xiao X, Liu Y, Zhang R, Liu J, Liu Q, et al. Mosquito C-type lectins  
577 maintain gut microbiome homeostasis. *Nature Microbiology*. 2016;1(5):16023. doi:  
578 10.1038/nmicrobiol.2016.23.
- 579 16. Short SM, Mongodin EF, MacLeod HJ, Talyuli OAC, Dimopoulos G. Amino acid  
580 metabolic signaling influences *Aedes aegypti* midgut microbiome variability. *PLoS*  
581 *Neglected Tropical Diseases*. 2017;11(7):e0005677-29. doi:  
582 10.1371/journal.pntd.0005677.
- 583 17. Stathopoulos S, Neafsey DE, Lawniczak MKN, Muskavitch MAT, Christophides  
584 GK. Genetic dissection of *Anopheles gambiae* gut epithelial responses to *Serratia*  
585 *marcescens*. *PLOS Pathogens*. 2014;10(3):e1003897. doi:  
586 10.1371/journal.ppat.1003897.s015.
- 587 18. Xiao X, Yang L, Pang X, Zhang R, Zhu Y, Wang P, et al. A Mesh-Duox pathway  
588 regulates homeostasis in the insect gut. *Nature Microbiology*. 2017;2(5):17020. doi:  
589 10.1038/nmicrobiol.2017.20.
- 590 19. Powell JE, Leonard SP, Kwong WK, Engel P, Moran NA. Genome-wide screen  
591 identifies host colonization determinants in a bacterial gut symbiont. *Proceedings of the*  
592 *National Academy of Sciences of the United States of America*. 2016:201610856. doi:  
593 10.1073/pnas.1610856113.

- 594 20. Kim JK, Kwon JY, Kim S-K, Han SH, Won YJ, Lee J-H, et al. Purine  
595 biosynthesis, biofilm formation, and persistence of an insect-microbe gut symbiosis.  
596 Appl Environ Microbiol. 2014;80(14):4374-82. doi: 10.1128/AEM.00739-14.
- 597 21. Mulcahy H, Sibley CD, Surette MG, Lewenza S. *Drosophila melanogaster* as an  
598 animal model for the study of *Pseudomonas aeruginosa* biofilm infections in vivo. PLOS  
599 Pathogens. 2011;7(10):e1002299-14. doi: 10.1371/journal.ppat.1002299.
- 600 22. Maltz M, Graf J. The type II secretion system is essential for erythrocyte lysis and  
601 gut colonization by the leech digestive tract symbiont *Aeromonas veronii*. Applied and  
602 Environmental Microbiology. 2011;77(2):597-603. doi: 10.1128/AEM.01621-10.
- 603 23. Weiss BL, Wu Y, Schwank JJ, Tolwinski NS, Aksoy S. An insect symbiosis is  
604 influenced by bacterium-specific polymorphisms in outer-membrane protein A.  
605 Proceedings of the National Academy of Sciences of the United States of America.  
606 2008;105(39):15088-93. doi: 10.1073/pnas.0805666105.
- 607 24. Maltz MA, Weiss BL, O apos Neill M, Wu Y, Aksoy S. OmpA-mediated biofilm  
608 formation is essential for the commensal bacterium *Sodalis glossinidius* to colonize the  
609 tsetse fly gut. Applied and Environmental Microbiology. 2012;78(21):7760-8. doi:  
610 10.1128/AEM.01858-12.
- 611 25. Riehle MA, Jacobs-Lorena M. Using bacteria to express and display anti-parasite  
612 molecules in mosquitoes: current and future strategies. Insect Biochemistry and  
613 Molecular Biology. 2005;35(7):699-707. doi: 10.1016/j.ibmb.2005.02.008.
- 614 26. Dennison NJ, Saraiva RG, Cirimotich CM, Mlambo G, Mongodin EF, Dimopoulos  
615 G. Functional genomic analyses of *Enterobacter*, *Anopheles* and *Plasmodium* reciprocal

- 616 interactions that impact vector competence. *Malaria Journal*. 2016;15(1):425. Epub 3.  
617 doi: 10.1186/s12936-016-1468-2.
- 618 27. Pei D, Jiang J, Yu W, Kukutla P, Uentillie A, Xu J. The *waaL* gene mutation  
619 compromised the inhabitation of *Enterobacter sp. Ag1* in the mosquito gut environment.  
620 *Parasites & Vectors*. 2015:1-10. doi: 10.1186/s13071-015-1049-1.
- 621 28. Enomoto S, Chari A, Clayton AL, Dale C. Quorum sensing attenuates virulence  
622 in *Sodalis praecaptivus*. *Cell Host & Microbe*. 2017;21(5):629-36.e5. doi:  
623 10.1016/j.chom.2017.04.003.
- 624 29. Dale C, Young SA, Haydon DT, Welburn SC. The insect endosymbiont *Sodalis*  
625 *glossinidius* utilizes a type III secretion system for cell invasion. *Proceedings of the*  
626 *National Academy of Sciences*. 2001;98(4):1883-8. doi: 10.1073/pnas.021450998.
- 627 30. Selle K, microbiology RBTi, 2015. Harnessing CRISPR–Cas systems for  
628 bacterial genome editing. Elsevier. doi: 10.1016/j.tim.2015.01.008.
- 629 31. Sander JD, Joung JK. CRISPR-Cas systems for editing, regulating and targeting  
630 genomes. *Nature Biotechnology*. 2014;32(4):347-55. doi: 10.1038/nbt.2842.
- 631 32. Barrangou R, van Pijkeren JP. Exploiting CRISPR-Cas immune systems for  
632 genome editing in bacteria. *Current Opinion in Biotechnology*. 2016;37:61-8. doi:  
633 10.1016/j.copbio.2015.10.003.
- 634 33. Jiang Y, Chen B, Duan C, Sun B, Yang J, Yang S. Multigene editing in the  
635 *Escherichia coli* genome via the CRISPR-Cas9 system. *Applied and Environmental*  
636 *Microbiology*. 2015;81(7):2506-14. doi: 10.1128/AEM.04023-14.

- 637 34. Jiang W, Bikard D, Cox D, Zhang F, Marraffini LA. RNA-guided editing of  
638 bacterial genomes using CRISPR-Cas systems. *Nature Biotechnology*. 2013;31(3):233-  
639 9. doi: 10.1038/nbt.2508.
- 640 35. Reisch CR, Prather KLJ. The no-SCAR (Scarless Cas9 Assisted  
641 Recombineering) system for genome editing in *Escherichia coli*. *Scientific Reports*.  
642 2015;5:15096. doi: 10.1038/srep15096.
- 643 36. Li Y, Lin Z, Huang C, Zhang Y, Wang Z, Tang Y-j, et al. Metabolic engineering of  
644 *Escherichia coli* using CRISPR–Cas9 mediated genome editing. *Metabolic*  
645 *Engineering*. 2015;31:13-21. doi: 10.1016/j.ymben.2015.06.006.
- 646 37. Ronda C, Pedersen LE, Sommer MOA, Nielsen AT. CRMAGE: CRISPR  
647 Optimized MAGE Recombineering. *Scientific Reports*. 2016;6(1):1200. doi:  
648 10.1038/srep19452.
- 649 38. Tong Y, Robertsen HL, Blin K, Weber T, Lee SY. CRISPR-Cas9 Toolkit for  
650 *Actinomyces* Genome Editing. *Methods in molecular biology* 2018;1671(1):163-84. doi:  
651 10.1007/978-1-4939-7295-1\_11.
- 652 39. Oh J-H, van Pijkeren JP. CRISPR-Cas9-assisted recombineering in *Lactobacillus*  
653 *reuteri*. *Nucleic Acids Research*. 2014;42(17):e131-e. doi: 10.1093/nar/gku623.
- 654 40. Mougialos I, Bosma EF, Weenink K, Vossen E, Goijvaerts K, van der Oost J, et  
655 al. Efficient genome editing of a facultative thermophile using mesophilic spCas9. *ACS*  
656 *Synthetic Biology*. 2017;6(5):849-61. doi: 10.1021/acssynbio.6b00339.
- 657 41. Li K, Cai D, Wang Z, He Z, Chen S. Development of an efficient genome editing  
658 tool in *Bacillus licheniformis* using CRISPR-Cas9 nickase. *Applied and Environmental*  
659 *Microbiology*. 2018:AEM.02608-17. doi: 10.1128/AEM.02608-17.

- 660 42. Jiang Y, Qian F, Yang J, Liu Y, Dong F, Xu C, et al. CRISPR-Cpf1 assisted  
661 genome editing of *Corynebacterium glutamicum*. Nat Commun. 2017;8:15179. Epub  
662 2017/05/05. doi: 10.1038/ncomms15179.
- 663 43. Cobb RE, Wang Y, Zhao H. High-efficiency multiplex genome editing of  
664 *Streptomyces* species using an engineered CRISPR/Cas system. ACS Synth Biol.  
665 2015;4(6):723-8. Epub 2014/12/03. doi: 10.1021/sb500351f.
- 666 44. Waller MC, Bober JR, Nair NU, Beisel CL. Toward a genetic tool development  
667 pipeline for host-associated bacteria. Current Opinion in Microbiology. 2017;38:156-64.  
668 doi: 10.1016/j.mib.2017.05.006.
- 669 45. Wilke ABB, Marrelli MT. Paratransgenesis: a promising new strategy for  
670 mosquito vector control. Parasites & Vectors. 2015;8(1):391-19. doi: 10.1186/s13071-  
671 015-0959-2.
- 672 46. Arora AK, Douglas AE. Hype or opportunity? Using microbial symbionts in novel  
673 strategies for insect pest control. Journal of insect physiology. 2017;103:10-7. doi:  
674 10.1016/j.jinsphys.2017.09.011.
- 675 47. Ricci I, Damiani C, Capone A, DeFreece C, Rossi P, Favia G.  
676 Mosquito/microbiota interactions: from complex relationships to biotechnological  
677 perspectives. Current Opinion in Microbiology. 2012;15(3):278-84. doi:  
678 10.1016/j.mib.2012.03.004.
- 679 48. Beard CB, Mason PW, Aksoy S, Tesh RB, Richards FF. Transformation of an  
680 insect symbiont and expression of a foreign gene in the Chagas' disease vector  
681 *Rhodnius prolixus*. American Journal of Tropical Medicine and Hygiene.  
682 1992;46(2):195-200.



- 683 49. Bisi DC, Lampe DJ. Secretion of anti-Plasmodium effector proteins from a natural  
684 *Pantoea agglomerans* isolate by using PelB and HlyA secretion signals. Applied and  
685 Environmental Microbiology. 2011;77(13):4669-75. doi: 10.1128/AEM.00514-11.
- 686 50. Hughes GL, Allsopp PG, Webb RI, Yamada R, Iturbe-Ormaetxe I, Brumbley SM,  
687 et al. Identification of yeast associated with the planthopper, *Perkinsiella saccharicida*:  
688 potential applications for Fiji leaf gall control. Current Microbiology. 2011;63(4):392-401.  
689 doi: 10.1007/s00284-011-9990-5.
- 690 51. Medina F, Li H, Vinson SB, Coates CJ. Genetic transformation of midgut bacteria  
691 from the red imported fire ant (*Solenopsis invicta*). Current Microbiology.  
692 2009;58(5):478-82. doi: 10.1007/s00284-008-9350-2.
- 693 52. Bextine B, Lauzon C, Potter S, Lampe D, Miller TA. Delivery of a genetically  
694 marked *Alcaligenes sp.* to the glassy-winged sharpshooter for use in a paratransgenic  
695 control strategy. Current Microbiology. 2004;48(5):327-31. doi: 10.1007/s00284-003-  
696 4178-2.
- 697 53. Hurwitz I, Hillesland H, Fieck A, Das P, Durvasula R. The paratransgenic sand  
698 fly: A platform for control of *Leishmania* transmission. Parasites & Vectors.  
699 2011;4(1):82. doi: 10.1186/1756-3305-4-82.
- 700 54. Durvasula RV, Gumbs A, Panackal A, Kruglov O, Taneja J, Kang AS, et al.  
701 Expression of a functional antibody fragment in the gut of *Rhodnius prolixus* via  
702 transgenic bacterial symbiont *Rhodococcus rhodnii*. Medical and Veterinary  
703 Entomology. 1999;13(2):115-9.
- 704 55. Wang S, Ghosh AK, Bongio N, Stebbings KA, Lampe DJ, Jacobs-Lorena M.  
705 Fighting malaria with engineered symbiotic bacteria from vector mosquitoes.

- 706 Proceedings of the National Academy of Sciences of the United States of America.  
707 2012;109(31):12734-9. doi: 10.1073/pnas.1204158109.
- 708 56. Wu SC-Y, Maragathavally KJ, Coates CJ, Kaminski JM. Steps toward targeted  
709 insertional mutagenesis with class II transposable elements. *Methods in molecular*  
710 *biology* 2008;435:139-51. doi: 10.1007/978-1-59745-232-8\_10.
- 711 57. Tikhe CV, Martin TM, Howells A, Delatte J, Husseneder C. Assessment of  
712 genetically engineered *Trabulsiella odontotermis* as a 'Trojan Horse' for  
713 paratransgenesis in termites. *BMC Microbiology*. 2016;16(1):355. doi: 10.1186/s12866-  
714 016-0822-4.
- 715 58. Pittman GW, Brumbley SM, Allsopp PG, O apos Neill SL. Assessment of gut  
716 bacteria for a paratransgenic approach to control *Dermolepida albohirtum* larvae.  
717 *Applied and Environmental Microbiology*. 2008;74(13):4036-43. doi:  
718 10.1128/AEM.02609-07.
- 719 59. Pontes MH, Dale C. Lambda red-mediated genetic modification of the insect  
720 endosymbiont *Sodalis glossinidius*. *Applied and Environmental Microbiology*.  
721 2011;77(5):1918-20. doi: 10.1128/AEM.02166-10.
- 722 60. Wang S, Dos-Santos ALA, Huang W, Liu KC, Oshaghi MA, Wei G, et al. Driving  
723 mosquito refractoriness to *Plasmodium falciparum* with engineered symbiotic bacteria.  
724 *Science (New York, NY)*. 2017;357(6358):1399-402. doi: 10.1126/science.aan5478.
- 725 61. Dotson EM, Plikaytis B, Shinnick TM, Durvasula RV, Beard CB. Transformation  
726 of *Rhodococcus rhodni*, a symbiont of the Chagas disease vector *Rhodnius prolixus*,  
727 with integrative elements of the L1 mycobacteriophage. *Infection, genetics and*  
728 *evolution*. 2003;3(2):103-9.

- 729 62. Bextine B, Lampe D, Lauzon C, Jackson B, Miller TA. Establishment of a  
730 genetically marked insect-derived symbiont in multiple host plants. *Curr Microbiol.*  
731 2005;50(1):1-7. doi: 10.1007/s00284-004-4390-8.
- 732 63. Wu P, Sun P, Nie K, Zhu Y, Shi M, Xiao C, et al. A gut commensal bacterium  
733 promotes mosquito permissiveness to arboviruses. *Cell Host & Microbe.*  
734 2019;25(1):101-12.e5. doi: 10.1016/j.chom.2018.11.004.
- 735 64. Coon KL, Vogel KJ, Brown MR, Strand MR. Mosquitoes rely on their gut  
736 microbiota for development. *Molecular Ecology.* 2014;23(11):2727-39. doi:  
737 10.1111/mec.12771.
- 738 65. Lindh JM, Borg-Karlson AK, Faye I. Transstadial and horizontal transfer of  
739 bacteria within a colony of *Anopheles gambiae* (Diptera: Culicidae) and oviposition  
740 response to bacteria-containing water. *Acta Tropica.* 2008;107(3):242-50. doi:  
741 10.1016/j.actatropica.2008.06.008.
- 742 66. Coon KL, Brown MR, Strand MR. Gut bacteria differentially affect egg production  
743 in the anautogenous mosquito *Aedes aegypti* and facultatively autogenous mosquito  
744 *Aedes atropalpus* (Diptera: Culicidae). *Parasites & Vectors.* 2016;9(1):375. doi:  
745 10.1186/s13071-016-1660-9.
- 746 67. Ribet D, Cossart P. How bacterial pathogens colonize their hosts and invade  
747 deeper tissues. *Microbes and infection.* 2015;17(3):173-83. doi:  
748 10.1016/j.micinf.2015.01.004.
- 749 68. Ramirez JL, Short SM, Bahia AC, Saraiva RG, Dong Y, Kang S, et al.  
750 *Chromobacterium Csp\_P* reduces malaria and dengue infection in vector mosquitoes

751 and has entomopathogenic and in vitro anti-pathogen activities. PLoS Pathogens.  
752 2014;10(10):e1004398. doi: 10.1371/journal.ppat.1004398.

753 69. Valzania L, Martinson VG, Harrison RE, Boyd BM, Coon KL, Brown MR, et al.  
754 Both living bacteria and eukaryotes in the mosquito gut promote growth of larvae. PLoS  
755 Neglected Tropical Diseases. 2018;12(7):e0006638. doi: 10.1371/journal.pntd.0006638.

756 70. Correa MA, Matusovsky B, Brackney DE, Steven B. Generation of axenic *Aedes*  
757 *aegypti* demonstrate live bacteria are not required for mosquito development. Nature  
758 Communications. 2018;9(1):R37. doi: 10.1038/s41467-018-07014-2.

759 71. Favia G, Ricci I, Damiani C, Raddadi N, Crotti E, Marzorati M, et al. Bacteria of  
760 the genus *Asaia* stably associate with *Anopheles stephensi*, an Asian malarial mosquito  
761 vector. Proceedings of the National Academy of Sciences. 2007;104(21):9047-51. doi:  
762 10.1073/pnas.0610451104.

763 72. Chaverra-Rodriguez D, Macias VM, Hughes GL, Pujhari S, Suzuki Y, Peterson  
764 DR, et al. Targeted delivery of CRISPR-Cas9 ribonucleoprotein into arthropod ovaries  
765 for heritable germline gene editing. Nature Communications. 2018;9(1):245. doi:  
766 10.1038/s41467-018-05425-9.

767 73. Li M, Bui M, Yang T, Bowman CS, White BJ, Akbari OS. Germline Cas9  
768 expression yields highly efficient genome engineering in a major worldwide disease  
769 vector, *Aedes aegypti*. Proceedings of the National Academy of Sciences of the United  
770 States of America. 2017;114(49):E10540-E9. doi: 10.1073/pnas.1711538114.

771 74. Montague TG, Cruz JM, Gagnon JA, Church GM, Valen E. CHOPCHOP: a  
772 CRISPR/Cas9 and TALEN web tool for genome editing. Nucleic Acids Research.  
773 2014;42(W1):W401-W7. doi: 10.1093/nar/gku410.

- 774 75. Labun K, Montague TG, Gagnon JA, Thyme SB, Valen E. CHOPCHOP v2: a  
775 web tool for the next generation of CRISPR genome engineering. *Nucleic Acids*  
776 *Research*. 2016;44(W1):W272-W6. doi: 10.1093/nar/gkw398.
- 777 76. Trehan A, Kiełbus M, Czapinski J, Stepulak A, Huhtaniemi I, Rivero-Müller A.  
778 REPLACR-mutagenesis, a one- step method for site-directed mutagenesis by  
779 recombineering. *Scientific Reports*. 2015:1-9. doi: 10.1038/srep19121.
- 780 77. Kozlova EV, Khajanchi BK, Popov VL, Wen J, Chopra AK. Impact of QseBC  
781 system in c-di-GMP-dependent quorum sensing regulatory network in a clinical isolate  
782 SSU of *Aeromonas hydrophila*. *Microbial pathogenesis*. 2012;53(3-4):115-24. doi:  
783 10.1016/j.micpath.2012.05.008.
- 784 78. O' Toole GA, Kolter R. Flagellar and twitching motility are necessary for  
785 *Pseudomonas aeruginosa* biofilm development. *Molecular Microbiology*.  
786 1998;30(2):295-304. doi: 10.1046/j.1365-2958.1998.01062.x.
- 787
- 788

789

790 **S1 Table.** gRNA sequences tested in this study. Capital letters indicate the protospacer  
791 sequence.

| gRNA       | Sequence (5'-3')                                                                             |
|------------|----------------------------------------------------------------------------------------------|
| Ec.gRNA1   | CTACCCGCTCGAATACCAGgttttagagctagaatagcaagttaaataaggctagtcggtatcaactgaaaaagtgccaccgagtcggtgc  |
| Ec.gRNA2   | GGTTCTGACGCTTACAACCAgttttagagctagaatagcaagttaaataaggctagtcggtatcaactgaaaaagtgccaccgagtcggtgc |
| Ent. gRNA1 | CTACCCGCTCGAATACCAGgttttagagctagaatagcaagttaaataaggctagtcggtatcaactgaaaaagtgccaccgagtcggtgc  |
| Ent. gRNA2 | GCTGCAGAAAGCAGCTCTCGgttttagagctagaatagcaagttaaataaggctagtcggtatcaactgaaaaagtgccaccgagtcggtgc |

792  
793

794

795 **S2 Table.** Plasmids and bacterial strains used in this study.

| Plasmid and strains                   | Relevant characteristics                                                                                                                                                                | Reference  |
|---------------------------------------|-----------------------------------------------------------------------------------------------------------------------------------------------------------------------------------------|------------|
| E. coli BL21 (DE3)                    | <i>fhuA2 [lon] ompT gal (λ DE3) [dcm] ΔhsdS, λ DE3 = λ sBamHI</i>                                                                                                                       | NEB        |
| Ec. ΔompA                             | Δ <i>EcoRI-B int::(lacI::PlacUV5::T7 gene1) i21 Δnin5</i>                                                                                                                               | This study |
| <i>Enterobacter symbiont</i><br>ΔompA | <i>E. coli</i> BL21 (DE3) ΔompA                                                                                                                                                         | This study |
| Ent:ΔompA                             | Enterobacter ΔompA pRAM_mCherry_ompA; Kan <sup>r</sup>                                                                                                                                  | This study |
| ompA::mChery                          | Enterobacter ΔompA::AmTr::mChery                                                                                                                                                        | This study |
| ompA::gentamicin                      | Enterobacter ΔompA::AmTr::gentamicin; Gent <sup>r</sup>                                                                                                                                 | This study |
| pKDsRNA-xxx                           | gRNA amplification plasmid with scaffold sequence under P <sub>TET</sub> promoter & λ-Red system under control of the arabinose inducible promoter P <sub>araB</sub> ;Spec <sup>r</sup> | 36         |
| pcas9cr4                              | expressed under control of the PTET promoter and tetR constitutively express                                                                                                            | 36         |
| pRAM_mChery                           | mChery expressing plasmid under the ompA promoter                                                                                                                                       | This study |

796  
797

798

799

800

801

802

803

804

805

806

807

808

809

810 **S3 Table. Primers used in this study.**

| Primer              | Sequence (5'-3')                                      | Description                                                        |
|---------------------|-------------------------------------------------------|--------------------------------------------------------------------|
| InF_BL21ompAgRNA1_F | CTA CCC GTC TGG AAT ACC AGG TTT TAG AGC TAG AAA TAG C | Amplification of <i>E. coli ompA</i> gRNA1 and cloning             |
| InF_BL21ompAgRNA1_R | CTG GTA TTC CAG ACG GGT AGG TGC TCA GTA TCT CTA TCA C | Amplification of <i>E. coli ompA</i> gRNA1 and cloning             |
| InF_BL21ompAgRNA2_F | GGT TCT GAC GCT TAC AAC CAG TTT TAG AGC TAG AAA TAG C | Amplification of <i>E. coli ompA</i> gRNA2 and cloning             |
| InF_BL21ompAgRNA2_R | TGG TTG TAA GCG TCA GAA CCG TGC TCA GTA TCT CTA TCA C | Amplification of <i>E. coli ompA</i> gRNA2 and cloning             |
| BL21ompA1_LAFw      | CTT TTT TTT CAT ATG CCT GAC GG                        | Amplification of left arm of donor dsDNA <i>E. coli</i>            |
| BL21ompA1_LARv      | AAG CCT GCG GCT GAG TTA GCG ATA GCT GTC TTT TTC AT    | Amplification of left arm of donor dsDNA <i>E. coli</i>            |
| BL21ompA1_RAFw      | TAA CTC AGC CGC AGG CTT AAG TTC TCG TCT GGT AGA A     | Amplification of right arm of donor dsDNA <i>E. coli</i>           |
| BL21ompA1_RARv      | GTC GCG GTA AAA CGC TTT CTG                           | Amplification of right arm of donor dsDNA <i>E. coli</i>           |
| OmpA1_COLPCR_F      | CTACCCGTCTGGAATACCG                                   | <i>ompA</i> Colony PCR primer                                      |
| OmpA2_COLPCR_F      | GGTTCTGACGCTTACAACCA                                  | <i>ompA</i> Colony PCR primer                                      |
| pRAM_CompV_F        | TAACTCAGCCTGCGCATAAGGCTAATAAGCAACGGTCT                | Amplification of complement vector                                 |
| pRAM_CompV_R        | GCGATAGCTGCTTTTTTCATATGTAACCTTAATCAAAA                | Amplification of complement vector                                 |
| ompA_F              | TTTTGATTAAGGTTTTACATATGAAAAGACAGCTATCGC               | Amplification of <i>Enterobacter ompA</i> gene                     |
| ompA_R              | AGAACGGTTGCTTATTAGCCTTATGCCGACGGCTGAGTTA              | Amplification of <i>Enterobacter ompA</i> gene                     |
| ompAprom_COLPCR_F   | CTATGTTATTAATTATAATAG                                 | colony PCR primer                                                  |
| EntompALA_F         | ATGAAAAGACAGCTATCCG                                   | Amplification of left arm of dsDNA for <i>ompA</i> deletion        |
| EntompALA_R         | CGTTTTTCAGACAGTTTTCCAAAACCAACGTACGGGTTAAC             | Amplification of left arm of dsDNA for <i>ompA</i> deletion        |
| EntompARA_F         | GAAACTGTCTGAAAACAGTGCACAGAGCGGTTGTTGAT                | Amplification of right arm of dsDNA for <i>ompA</i> deletion       |
| EntompARA_R         | TTATGCCGCAGGCTGAGTTAC                                 | Amplification of right arm of dsDNA for <i>ompA</i> deletion       |
| COLPCR_R            | GACGTTCTCAAACTACATT                                   | colony pcr primer                                                  |
| Ent. ompA_LAF       | ATGGGTTACGACTGGCTTGGC                                 | Amplification of left arm of donor dsDNA for insertion             |
| Ent. ompA_LAR       | GTTCTAGGAGGAGCCGATGTACGGGTAACDGGCCAC                  | Amplification of left arm of donor dsDNA for insertion             |
| AmTr prom_F         | GTTACCCGTGACATCGGGCTCCTCTAGAACGATCGCCGC               | Amplification of AmTr promoter for dsDNA for insertion             |
| AmTr prom.gent_R    | TGCTGCTGCGTAAACATTATAATATCCCTTATGTTACTC               | Amplification of AmTr promoter for dsDNA for gentamicin insertion  |
| Gent. F             | CATAAGGGATATTATAATGTACGCAGCAGCAACGATG                 | Amplification of Gentamicin for dsDNA                              |
| Gent. R             | CGATGTTGTTAACCCATTAGGTGGCGTACTTGGGTCG                 | Amplification of Gentamicin for dsDNA                              |
| Ent. ompA_RAF1-gent | CAAGTACCGCCACCTAATGGGTTAAACAACATCGGTGATGC             | Amplification of right arm of donor dsDNA for gentamicin insertion |
| Ent.ompA_RAR        | TCAGCTGGGTGTACAGCTGATC                                | Amplification of right arm of donor dsDNA for insertion            |
| AmTr mChery_R       | CTCCCTTGCTGACCATTATAATATCCCTTATGTTACTC                | Amplification of AmTr promoter for dsDNA for mChery insertion      |
| mChery. F           | CATAAGGGATATTATAATGGTACGAGGAGGAGGAAAG                 | Amplification of mChery for dsDNA                                  |
| mChery. R           | CGATGTTGTTAAACCCACTATTTGTATAATTCGTCCATTC              | Amplification of mChery for dsDNA                                  |
| pkdsgRNA_COLPCR_F   | GTC TGA CGC TCA GTG GAA CG                            | Colony PCR primer for pKDsgRNA plasmid                             |
| pkdsgRNA_COLPCR_R   | CTG GCA GTT CCC TAC TCT CG                            | Colony PCR primer for pKDsgRNA plasmid                             |
| InF_EntinvgRNA1_F   | AAGCGACGCATGGCATCCGG gttttagagctagaataatagc           | Amplification of <i>Enterobacter ompA</i> gRNA1 and cloning        |
| InF_EntinvgRNA1_R   | CCGGATGCCATGCGTCTGCTT gtcctcagctatctctatcac           | Amplification of <i>Enterobacter ompA</i> gRNA1 and cloning        |
| InF_EntinvgRNA2_F   | GCTGCAGAAGCAGCTCTCGG gttttagagctagaataatagc           | Amplification of <i>Enterobacter ompA</i> gRNA2 and cloning        |
| InF_EntinvgRNA2_R   | CCGAGAGCTGCTTCTGCAGC gtcctcagctatctctatcac            | Amplification of <i>Enterobacter ompA</i> gRNA2 and cloning        |

811  
812

813 **S1. Appendix.** Multiple sequence alignment of WT and mutant *ompA* sequences of

814 *Enterobacter* and *E. coli*.

815 Multiple sequence alignment *E. coli* WT *ompA* and mutant *ompA*

```
816
817
818 WT      ATGAAAAAGACAGCTATCGCGATTGCAGTGGCACTGGCTGGTTTCGCTACCGTAGCGCAG
819 •ompA   ATGAAAAAGACAGCTATCGC-----
820 *****
821
822 WT      GCCGCTCCGAAAGATAACACCTGGTACTGGTGCTAAACTGGGCTGGTCCCAGTACCAT
823 •ompA   -----
824
825
826 WT      GACTACTGGTTTCATCAACAACAATGGCCCGACCCATGAAAACCAACTGGGCGCTGGTGCT
827 •ompA   -----
828
829
830 WT      TTTGGTGGTTACCAGGTTAACCCGATGTTGGCTTTGAAATGGGTTACGACTGGTTAGGT
831 •ompA   -----
832
833
834 WT      CGTATGCCGTACAAAGGCAGCGTTGAAAACGGTGATACAAAGCTCAGGGCGTTCAACTG
835 •ompA   -----
836
837
838 WT      ACCGCTAAACTGGGTTACCCAATCACTGACGACCTGGACATCTACTCGTCTGGGTGGT
839 •ompA   -----
840
841
842 WT      ATGGTATGGCGTGACAGACTAAATCCAACGTTTATGGTAAAAACACGACACCGGCGTT
843 •ompA   -----
844
845
846 WT      TCTCCGGTCTTCGCTGGCGGTGTTGAGTACGCGATCACTCCTGAAATCGCTACCCGTCTG
847 •ompA   -----
848
849
850 WT      GAATACCAGTGGACCAACAACATCGGTGACGCACACACCATCGGCACTCGTCCGACAAC
851 •ompA   -----
852
853
854 WT      GGCATGCTGAGCCTGGGTGTTTCTACCGTTTCGGTCAGGGCGAAGCAGCTCCAGTAGTT
855 •ompA   -----
856
857
858 WT      GCTCCGGCTCCAGCTCCGGCACCGGAAGTACAGACCAAGCACTTCACTCTGAAGTCTGAC
859 •ompA   -----
860
861
862 WT      GTTCTGTTCAACTTCAACAAAGCAACCCTGAAACCGGAAGGTCAGGCTGCTCTGGATCAG
863 •ompA   -----
864
865
866 WT      CTGTACAGCCAGCTGAGCAACCTGGATCCGAAAGACGGTTCCTAGTTGTTCTGGGTAC
867 •ompA   -----
868
869
870 WT      ACCGACCGCATCGGTTCTGACGCTTACAACCAGGGTCTGTCCGAGCGCCGTGCTCAGTCT
871 •ompA   -----
872
873
874 WT      GTTGTGATTACCTGATCTCAAAGGTATCCCGGCAGACAAGATCTCCGCACGTGGTATG
875 •ompA   -----
876
877
878 WT      GGCGAATCCAACCCGGTTACTGGCAACACCTGTGACAACGTGAAACAGCGTGCTGCACTG
879 •ompA   -----
```



880  
881  
882 WT ATCGACTGCCTGGCTCCGGATCGTCGCGTAGAGATCGAAGTTAAAGGTATCAAAGACGTT  
883 •ompA -----  
884  
885  
886 WT GTAACCTAGCCGCAGGCTTAA  
887 •ompA -TAACTCAGCCGCAGGCTTAA  
888 \*\*\*\*\*  
889  
890  
891  
892  
893  
894 Alignment of *Enterobacter* WT *ompA* and mutant *ompA* sequence  
895  
896  
897 WT atgaaaaagacagctatcgcgattgcagtgccactggctggcttcgctaccgtagcgcag 60  
898 •ompA atgaaaaagacagctatcgcgattgcagtgccactggctggcttcgctaccgtagcgcag 60  
899 \*\*\*\*\*  
900  
901 WT gccgcaccgaaagataaacacctggatgcaggtggtaaaactgggctggctctcagttccac 120  
902 •ompA gccgcaccgaaagataaacacctggatgcaggtggtaaaactgggctggctctcagttccac 120  
903 \*\*\*\*\*  
904  
905 WT gataccggctgggtataacaaggacctgcaaaacaacggtaaacacccacgaaagccagctg 180  
906 •ompA gataccggctgggtataacaaggacctgcaaaacaacggtaaacacccacgaaagccagctg 180  
907 \*\*\*\*\*  
908  
909 WT ggcgctgggtgccttcgggtgggtatcaggttaaccgctacgttgggtttgaaatgggttac 240  
910 •ompA ggcgctgggtgccttcgggtgggtatcaggttaaccgctacgttgggtttgaaa----- 232  
911 \*\*\*\*\*  
912  
913 WT gactggcttggccgatatgccttacaaggcagcgttaactagcgggtgccttcaaagctcag 300  
914 •ompA ----- 232  
915  
916  
917 WT ggcgtacagctgaccactaaactgggttacccaatcactgacgacctggacatctacacc 360  
918 •ompA ----- 232  
919  
920  
921 WT cgtctgggcccagcatggatggcgtgcagactctacaaacaccatcgctggtaaaaaccac 420  
922 •ompA ----- 232  
923  
924  
925 WT gacaccgggtgtttcccagatattcgctgggtgggtgtgagtgggcagttaccctgacatc 480  
926 •ompA ----- 232  
927  
928  
929 WT gctaccctgctggaataaccagtggttaacaacatcgggtgatgcacagacctggcggt 540  
930 •ompA ----- 232  
931  
932  
933 WT cgtcctgacaacggcatgctgagcgtaggtgtttcctaccgctttggccagcaggaagaa 600  
934 •ompA ----- 232  
935  
936  
937 WT gctgcaccagttgtagctccggctccagctccagctcctgaagtacagaccaaacacttc 660  
938 •ompA ----- 232  
939  
940  
941 WT actctgaagtctgacgtcctgttcaacttcaacaaagcaaccctgaaaccagaaggtcag 720  
942 •ompA ----- 232

```
943
944
945 WT          caggcactggatcagctgtacaccagctgagcaacctggatcctaaagatggttccggt 780
946 •ompA      ----- 232
947
948
949 WT          gttggttctgggctacaccgaccgtatcggttccgagcagtacaacctgaaactgtctgaa 840
950 •ompA      -----actgtctgaa 242
951                                     *****
952
953 WT          aaacgtgcacagagcgttggtgattacctgatctctaaaggatcccagcgaacaaaatc 900
954 •ompA      aaacgtgcacagagcgttggtgattacctgatctctaaaggatcccagcgaacaaaatc 302
955 *****
956
957 WT          tctccacgtggcatgggcaaagctaaccagttaccggcaacacctgtgacaaagtagcg 960
958 •ompA      tctccacgtggcatgggcaaagctaaccagttaccggcaacacctgtgacaaagtagcg 362
959 *****
960
961 WT          cctaaagctaaactgatcgactgcctggctccagatcgtcgcggttgagatcgaagttaa 1020
962 •ompA      cctaaagctaaactgatcgactgcctggctccagatcgtcgcggttgagatcgaagttaa 422
963 *****
964
965 WT          ggtatcaaagaagttgtaactcagcctgcggcataa 1056
966 •ompA      ggtatcaaagaagttgtaactcagcctgcggcataa 458
967 *****
```

968

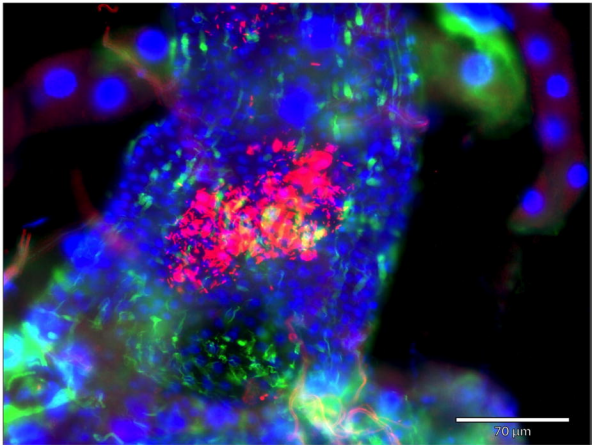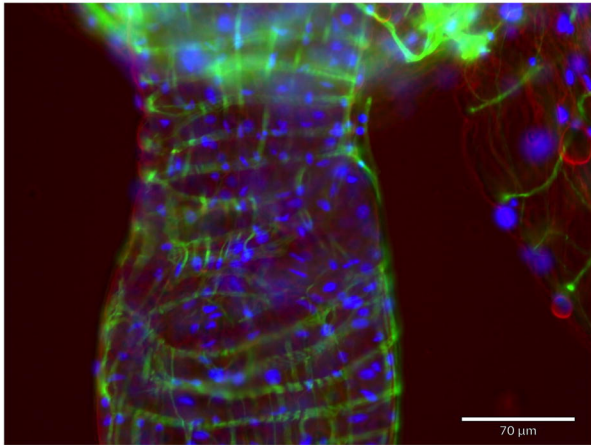

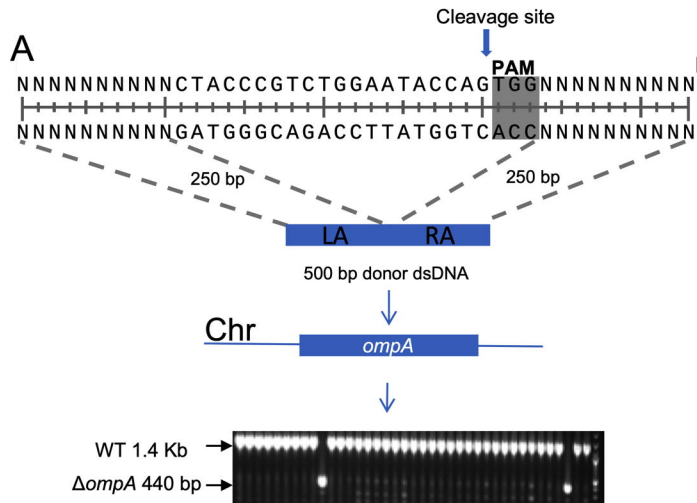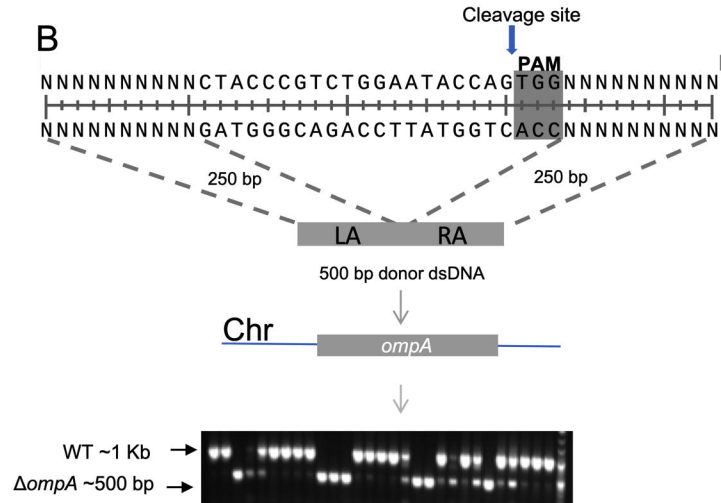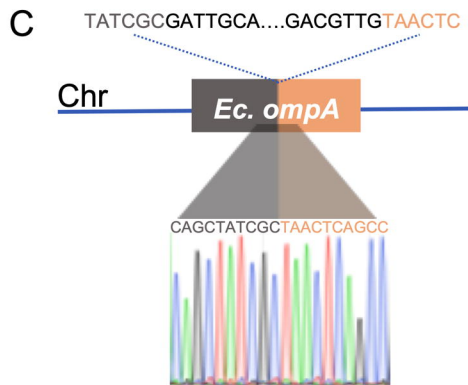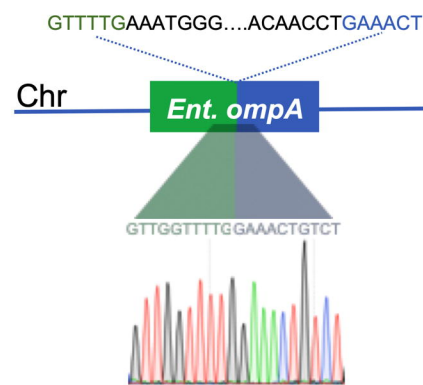

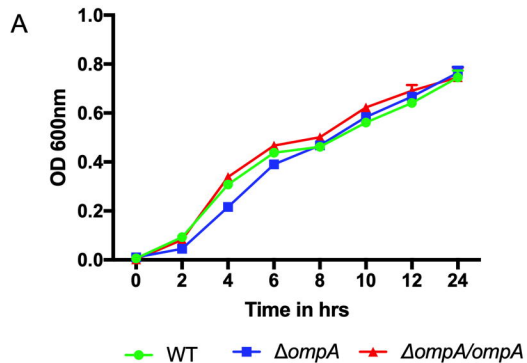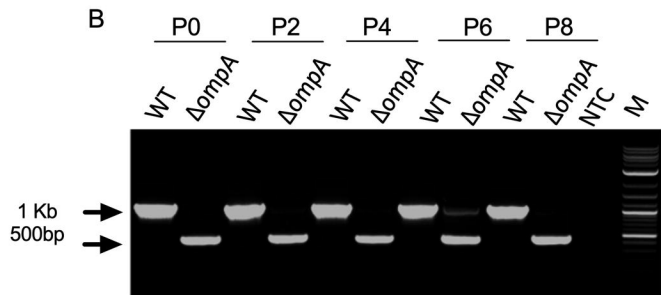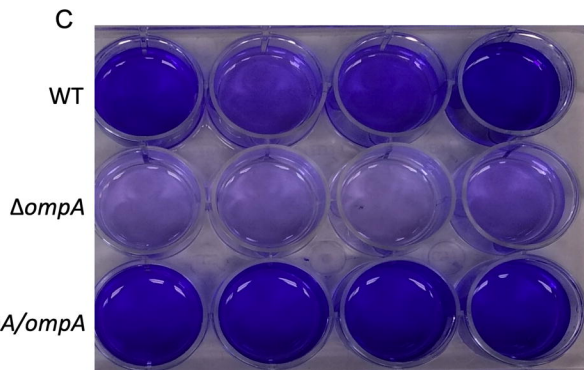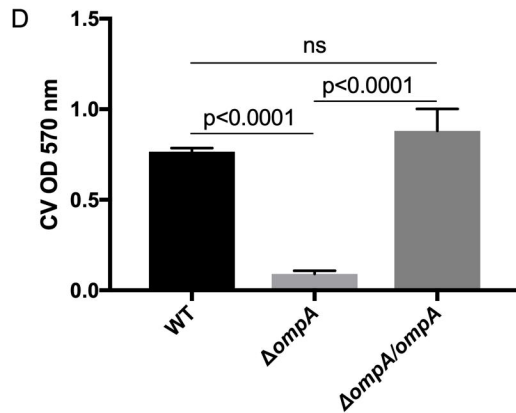

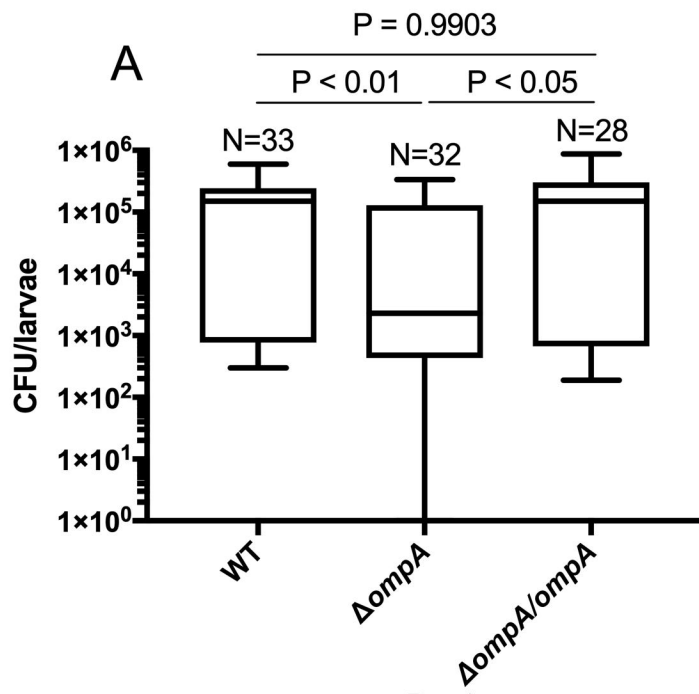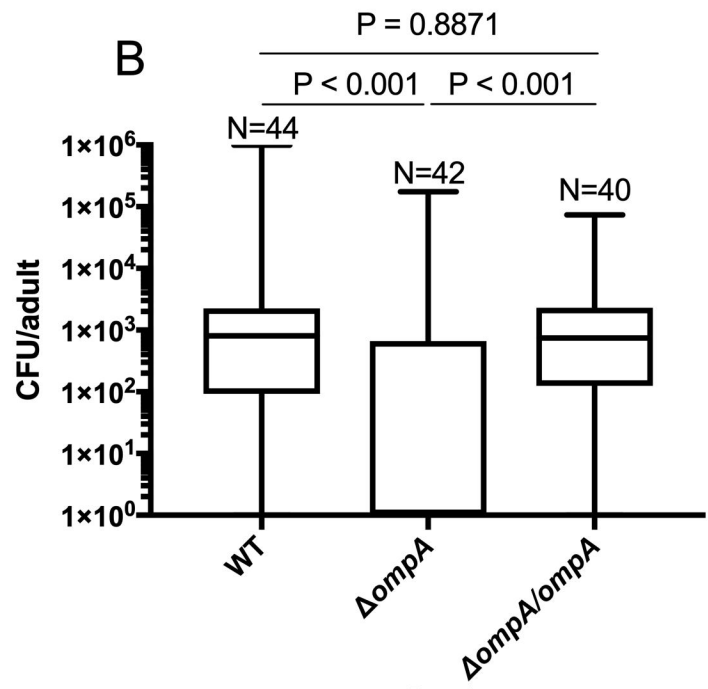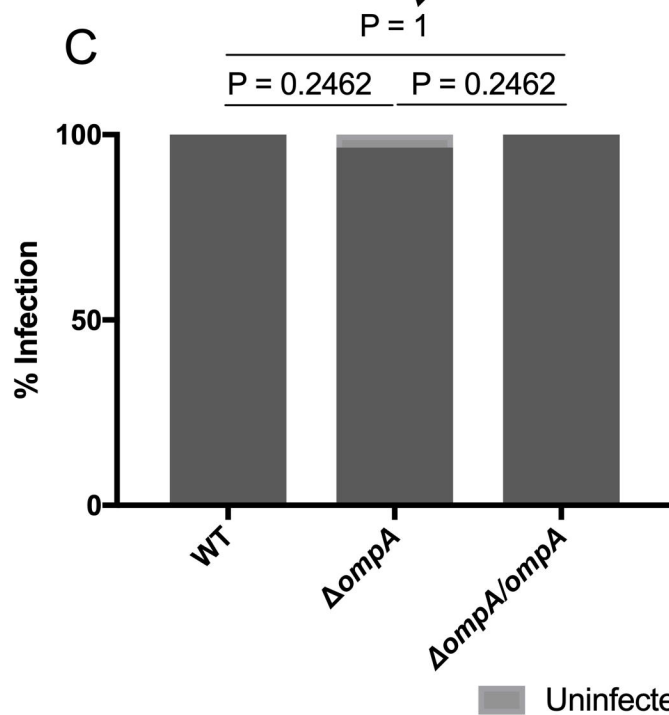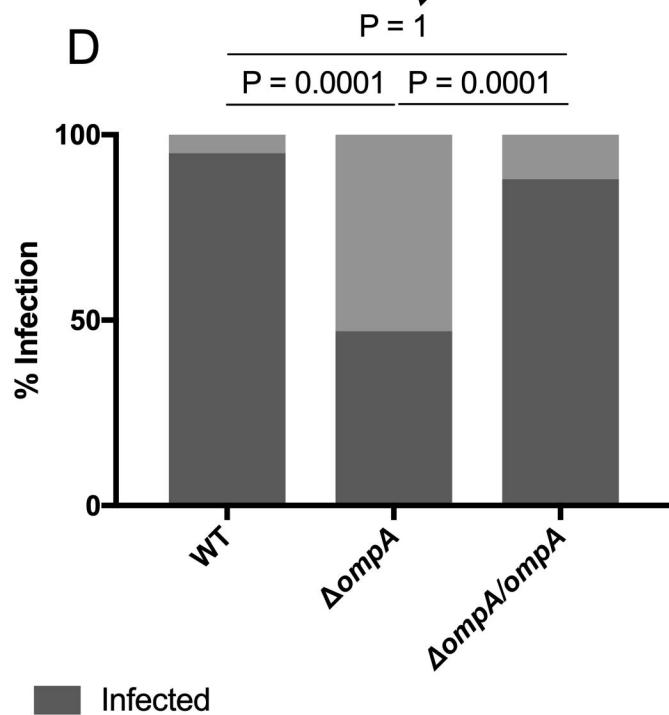

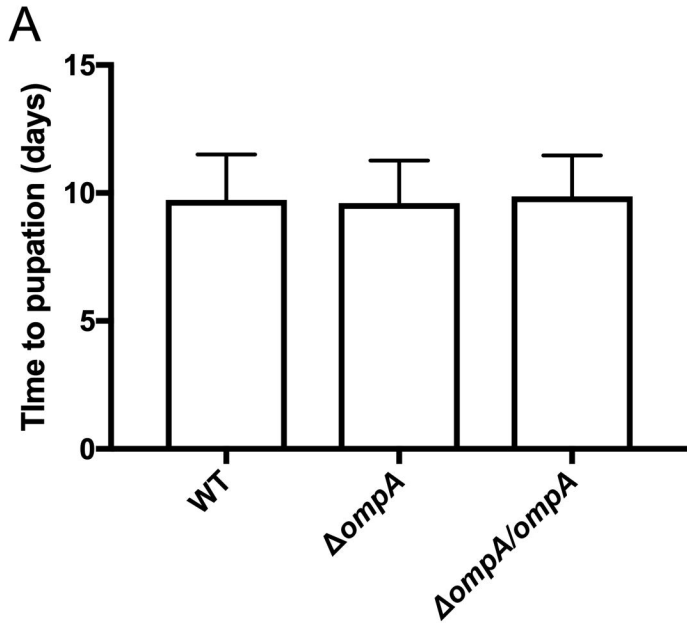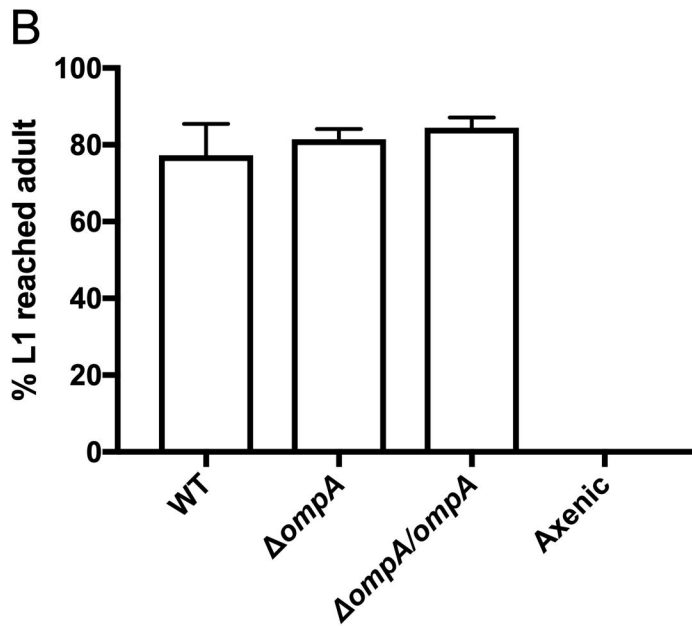

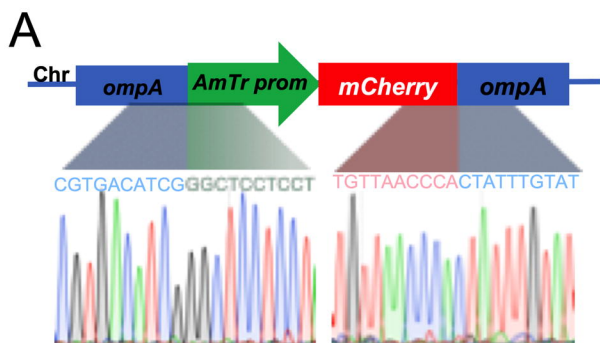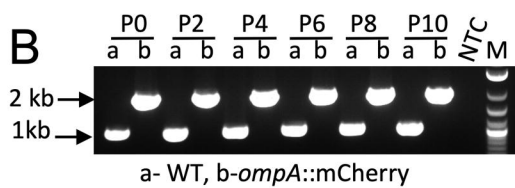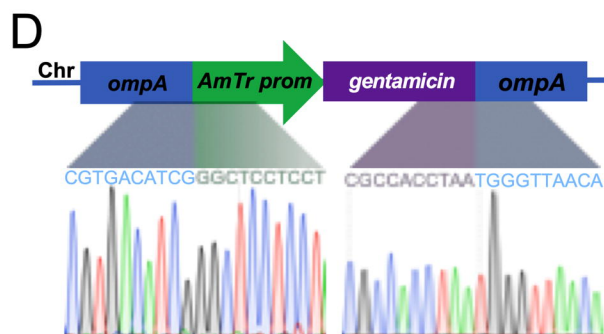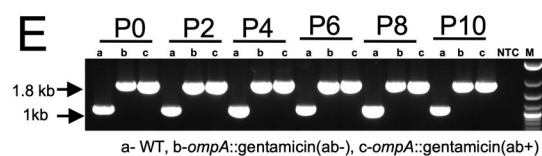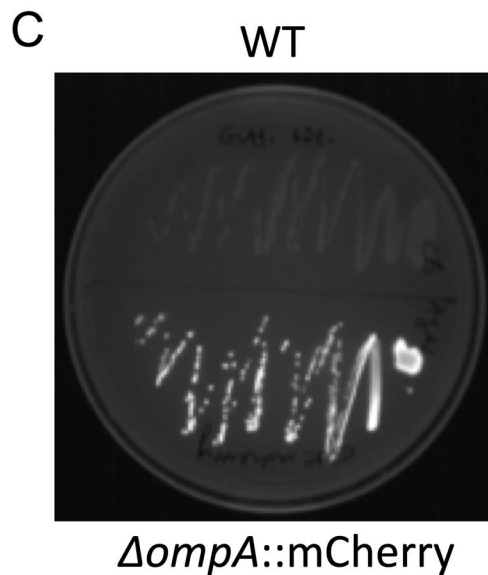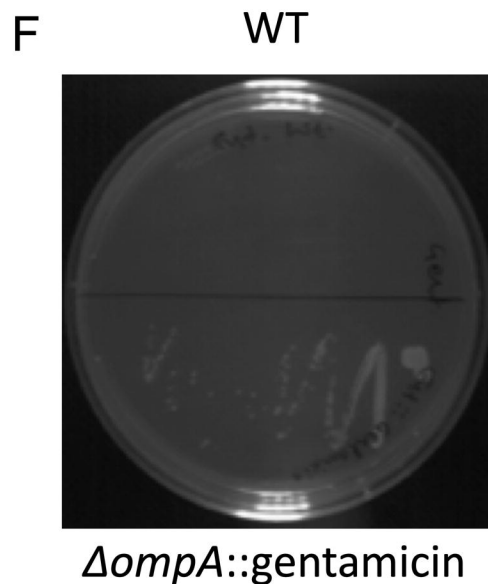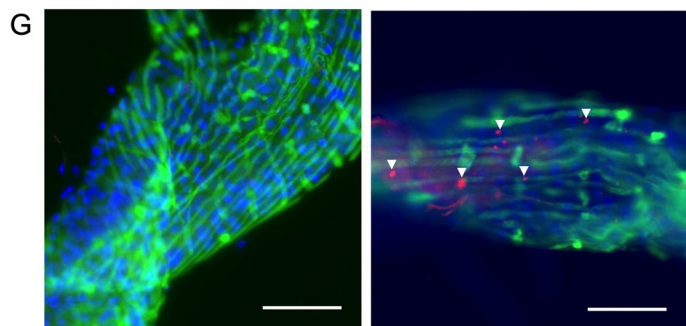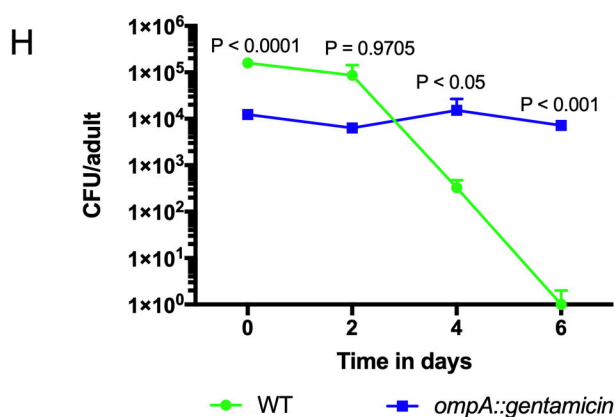

Source: https://www.biorxiv.org/content/biorxiv/early/2019/01/29/389957.full.pdf
