1 **CRISPR/Cas9-mediated gene deletion of the *ompA* gene in an *Enterobacter* gut**  
2 **symbiont impairs biofilm formation and reduces gut colonization of *Aedes***  
3 ***aegypti* mosquitoes**

4

5 Shivanand Hegde<sup>1</sup>, Pornjarim Nilyanimit<sup>2</sup>, Elena Kozlova<sup>1</sup>, Hema P. Narra<sup>1</sup>, Sanjeev K.  
6 Sahni<sup>1</sup>, Grant L. Hughes<sup>3,4,#</sup>

7

8 <sup>1</sup> Department of Pathology, University of Texas Medical Branch, Galveston, TX, USA.

9 <sup>2</sup> Center of Excellence in Clinical Virology, Chulalongkorn University, Bangkok,  
10 Thailand.

11 <sup>3</sup> Department of Pathology, Institute for Human Infections and Immunity, Center for  
12 Tropical Diseases, Center for Biodefense and Emerging Infectious Disease. University  
13 of Texas Medical Branch, Galveston, TX, USA.

14 <sup>4</sup> Current address: Department of Vector Biology and Department of Parasitology,  
15 Liverpool School of Tropical Medicine, Pembroke Place, Liverpool, UK.

16 #Corresponding author. Email: [grant.hughes@lstm.ac.uk](mailto:grant.hughes@lstm.ac.uk)

17

18

19

20 Running head: CRISPR/Cas9 engineering of a gut bacterium.

21

22 **Abstract**

23 CRISPR/Cas9 gene editing is a powerful tool to modify bacterial genomes but it has yet  
24 to be applied to insect symbionts. To demonstrate that the CRISPR/Cas9 system can  
25 be used to genetically alter host-associated bacteria, we deleted the outer membrane  
26 protein A (*ompA*) of an *Enterobacter* symbiont of *Aedes* mosquitoes. The  $\Delta ompA$   
27 mutant had an impaired ability to form biofilms and poorly infected *Ae. aegypti*. In  
28 adults, the mutant had a significantly reduced infection prevalence compared to the wild  
29 type or complement, while no differences in prevalence were seen in larvae, suggesting  
30 bacterial genetic factors are important for adult gut colonization. Integration of genes  
31 into the symbiont genome demonstrated this technology can be exploited to develop  
32 novel symbiotic control strategies. Our results provide insight into the role of the *ompA*  
33 gene in host-microbe interactions and confirms CRISPR/Cas9 technology can be  
34 employed for genetic manipulation of non-model gut microbes.

35

36

37 **Introduction.**

38 Mosquitoes harbor a community of microbes within their guts. In general, the gut-  
39 associated microbiome of mosquitoes tends to have low species richness but can differ  
40 greatly between individuals and habitats<sup>1-8</sup>. Importantly, these microbes can modulate  
41 many host phenotypes, several of which can influence vectorial capacity<sup>9-11</sup>. As such, it  
42 is imperative that we understand how the microbiome is acquired and maintained within  
43 mosquito vectors. While environmental factors unquestionably influences mosquito  
44 microbiome composition and abundance<sup>2-4,8</sup>, and studies are elucidating the role of  
45 microbial interactions<sup>5,7,12,13</sup> and host genetic factors<sup>14-18</sup> in shaping the microbiome, we  
46 have a poor understanding regarding bacterial factors that influence colonization of the  
47 mosquito gut.

48

49 In other invertebrates, several bacterial genes have been implicated in gut colonization.  
50 For example, a genome wide screen exploiting transposon-sequencing found a suite of  
51 genes from the bacterium *Snodgrassella* involved in colonization of the honey bee gut<sup>19</sup>.  
52 These bacterial genes were classified into the broad categories of extracellular  
53 interactions, metabolism and stress response<sup>19</sup>. Knock out of a purine biosynthesis  
54 gene in *Burkholderia* impaired biofilm formation and reduced bacterial colonization rates  
55 in a bean bug. Biofilm formation was also shown to play a role in virulence of  
56 pathogenic *Pseudomonas* in artificial infections of *Drosophila*, with strains that lacked  
57 the capacity to form biofilms being more virulence to the host, while a hyperbiofilm strain  
58 was less virulent than the WT strain<sup>20</sup>. In other blood feeding invertebrates, bacterial  
59 genetics also appears critical for host colonization. Knockout of the type II secretion

60 system in *Aeromonas veronii* reduced infection in *Hirudo verbena* leeches<sup>21</sup>. In Tsetse  
61 flies, the outer-membrane protein A (*ompA*) gene of *Sodalis glossinidius* is essential for  
62 symbiotic interactions<sup>22</sup>. *Sodalis* mutants lacking the *ompA* gene poorly colonized the fly  
63 gut compared to the wild type (WT) *Sodalis*<sup>22</sup> and the mutant strain also had a reduced  
64 capacity to form biofilms<sup>23</sup>. Heterologous expression of the *ompA* gene from pathogenic  
65 *Escherichia coli* in *Sodalis* mutants induced mortality in the fly implicating this gene as a  
66 virulence factor in pathogenic bacteria<sup>22</sup>. Taken together, these studies suggest that  
67 bacterial genetic factors are critical for host colonization of invertebrates and that biofilm  
68 formation facilitates symbiotic associations in insects.

69

70 In mosquitoes, few studies have investigated how bacterial genetics affect gut  
71 colonization. However, evidence from experimental evolution studies suggests bacterial  
72 genetics plays a critical role. In two separate studies, *Enterobacter* was selected for  
73 increased persistence in the gut of *Anopheles gambiae* mosquitoes, the major malaria  
74 vector in sub-Saharan Africa, by repeatedly infecting mosquitoes with strains that  
75 persisted in the gut for longer periods of time<sup>24,25</sup>. Transcriptomics comparisons of  
76 effective and ineffective colonizers in liquid media identified 41 genes that were  
77 differentially expressed between these two strains<sup>25</sup>, further implicating the importance  
78 of bacterial genetics in mosquito infection, however the role of these genes in  
79 colonization of the mosquito gut has not been resolved. In a separate study, *in vitro*  
80 screening of a transposon mutant library of *Enterobacter* identified a *waaL* gene mutant  
81 that was insensitive to oxidative stress<sup>26</sup>. The *waaL* gene encodes an O antigen ligase  
82 which is needed for attachment of the O antigen to lipopolysaccharide and the mutant

83 was found to have lower rates of colonization of the midguts of *Anopheles*  
84 mosquitoes<sup>26</sup>.  
85  
86 Gene knockout approaches in bacteria provide compelling evidence of the role of  
87 bacterial genes in host-microbe interactions<sup>21-23,26-28</sup>. In general, most studies use  
88 transposon mutagenesis for gene knockout, which requires screening of the mutant  
89 library. As *in vivo* screening is burdensome and in some cases not feasible, a targeted  
90 gene knockout approach is highly desirable to investigate the functionality of bacterial  
91 genes in host-microbe interactions. In the past few years, the CRISPR/Cas9 gene  
92 editing system has been employed to modify bacterial genomes<sup>29-31</sup>. While much of the  
93 work has been done in model bacterial species<sup>32-36</sup>, editing approaches have expanded  
94 into non-model bacterial systems<sup>37-42</sup>. Despite this expansion, few studies have used  
95 this technology in host-associated microbes<sup>43</sup>. In the vector biology field, gene knockout  
96 approaches can be used to interrogate the role of bacterial genes responsible for host-  
97 microbe interactions, while the ability to integrate genes into the bacterial symbiont  
98 genome has great potential for applied paratransgenic control strategies<sup>11,44-46</sup>.  
99 Previously, manipulation of non-model symbionts that associate with insect vectors  
100 have has been accomplished by plasmid transformation<sup>47-55</sup> or stable transformation of  
101 the genome using transposons or integrative plasmids<sup>56-61</sup>, but the use of CRISPR/Cas9  
102 gene editing in symbionts has yet to be accomplished. For paratransgenic strategies,  
103 stable site-specific integration of transgenes into the symbiont genome is critical, and as  
104 such, the application of CRISPR/Cas9 gene editing technology to non-model bacteria  
105 that associate with insect vectors will stimulate research in this field.

106

107 We therefore undertook studies to develop CRISPR/Cas9 genome editing approaches  
108 in an *Enterobacter* species isolated from *Aedes aegypti* mosquitoes, the major vector of  
109 arboviruses such as dengue, Zika and Yellow fever viruses. We used the Scarless Cas9  
110 Assisted Recombineering (no-SCAR) method to disrupt the *ompA* gene of the non-  
111 model *Enterobacter* species<sup>35</sup>. The no-SCAR approach is a single step genome editing  
112 system that does not require a selectable marker<sup>35</sup>. After characterization of the mutant  
113 *in vitro*, we examined the role of the *ompA* gene in host-microbe interactions by re-  
114 infecting bacteria into mosquito in a mono-association. To demonstrate that the  
115 CRISPR/Cas9 gene-editing system could be useful for applied symbiotic control  
116 approaches we inserted genes conferring antibiotic resistance or a fluorescent protein  
117 into the bacterial genome and re-infected the altered strains back into mosquitoes. Our  
118 result sheds insights into the role of the *ompA* gene in host-microbe interactions in *Ae.*  
119 *aegypti* and confirm that CRISPR/Cas9 gene editing can be a powerful tool for genetic  
120 manipulation of native gut-associated microbes of mosquitoes.

## 121 **Results**

### 122 ***Enterobacter* biofilm formation in *Ae. aegypti* guts**

123 Over the course of conducting mono-axenic infections in *Ae. aegypti* mosquitoes with  
124 an *Enterobacter* symbiont, we repeatedly observed a conglomeration of bacterial cells  
125 in the gut that was indicative of a biofilm (Figure 1). This formation of bacteria has a  
126 similar appearance to biofilms observed in the guts of other insects<sup>20,23</sup>. No bacteria  
127 were observed in *Ae. aegypti* when infections were conducted with *E. coli* that was not  
128 adapted to the mosquito gut environment (Figure 1), although as seen previously,  
129 infection with *E. coli* enabled mosquito development<sup>62-64</sup>. We therefore sort out to  
130 examine the role of bacterial genetics in biofilm formation and host colonization of this  
131 gut-associated bacterium of *Aedes* mosquitoes. While several genes have been  
132 implicated in biofilm formation<sup>20,23,65</sup>, we chose to knockout the *ompA* gene of  
133 *Enterobacter* given that this gene has been demonstrated to influence biofilm formation  
134 and gut colonization of *Sodalis*<sup>22,23</sup>, an *Enterobacteriaceae* symbiont of Tsetse flies,  
135 which is phylogenetically related to *Enterobacter*. The CRISPR/Cas9 genome editing  
136 system was employed to edit the symbionts genome.

137

### 138 **Genome editing in non-model *Enterobacter* bacteria isolated from mosquitoes.**

139 To edit the *Enterobacter* isolate that resides within the gut of *Aedes* mosquitoes, we  
140 employed the no-SCAR gene editing approach that had been developed in *E. coli*<sup>35</sup>. To  
141 optimize the approach in our hands, we performed initial experiments in *E. coli* to delete  
142 a ~1 kb region of the *ompA* gene (Figure 2A). As the no-SCAR approach exploits the  $\lambda$ -  
143 Red recombineering system to repair double stranded breaks, we supplied cells with a

144 double stranded DNA template that had regions of homology flanking the gRNA site  
145 (250 bp for each arm). Using this approach, we successfully deleted a 1001 bp  
146 fragment of the *ompA* gene. Of the colonies we screened, we saw an editing at a  
147 frequency of 6.25% (N = 48) (Figure 2A). Given our successful editing in *E. coli*, we  
148 employed this technique in the non-model *Enterobacter*. However, we altered our  
149 editing procedure to delete a 598 bp fragment from the *Enterobacter ompA* gene. This  
150 was done to attain a higher frequency of mutants<sup>66</sup> and accommodate a different PAM  
151 site in the *ompA* gene of *Enterobacter*. Using a donor template designed for the  
152 *Enterobacter ompA* gene that had similar length flanking homology arms as the  
153 previous experiment done in *E. coli*, we obtained mutant knockouts at a rate of 32% (N  
154 = 50) (Figure 2B). For both bacterial species, Sanger sequencing across the integration  
155 site indicated the deletion occurred at the expected loci in the bacterial genome (Figure  
156 2C; Supplementary text 1 and 2).

157

### 158 **Characterization of the *Enterobacter ompA* mutant.**

159 We quantified the growth rates of the  $\Delta ompA$  mutant in comparison to the WT  
160 *Enterobacter* and the  $\Delta ompA/ompA$  complement in liquid LB media. We saw no  
161 significant difference between the WT, the  $\Delta ompA$  mutant or the  $\Delta ompA/ompA$   
162 complement (Figure 3A). To examine the stability of the deletion, we subcultured the  
163  $\Delta ompA$  mutant on LB media for 10 generations and performed PCR to amplify across  
164 the deletion. At alternative generations PCR analysis indicated the deletion was present  
165 indicating genomic stability at this site (Figure 3B).

166



167 Previously, *ompA* has been shown to be important in biofilm formation as *Sodalis*  
168 deletion mutants were unable to form biofilms<sup>23</sup>. As such we characterized *in vitro*  
169 biofilm formation using the crystal violet (CV) biofilm assay. After visual inspection, it  
170 was clear the  $\Delta ompA$  mutant had distinctly less biofilm deposition compared to either  
171 the WT or the  $\Delta ompA/ompA$  complement (Figure 3C), and after quantification and  
172 normalization to account for any difference in growth between the strains, biofilm  
173 formation was confirmed to be significantly different between the  $\Delta ompA$  mutant and the  
174 WT (Figure 3D; Tukey's multiple comparisons test,  $P < 0.0001$ ) or  $\Delta ompA/ompA$   
175 complement (Tukey's multiple comparisons test,  $P < 0.0001$ ), while there was no  
176 significant differences between the WT and the  $\Delta ompA/ompA$  complement (Tukey's  
177 multiple comparisons test  $P = 0.2$ ).

178

### 179 **The role of *ompA* gene in mosquito infection.**

180 To examine the importance of the *ompA* gene on bacterial colonization of mosquitoes,  
181 we infected *Ae. aegypti* mosquitoes in a mono-association under gnotobiotic  
182 conditions<sup>6</sup>. This infection method was used to avoid other gut-associated microbes  
183 influencing host colonization rates<sup>7</sup> and it also assisted in quantification of introduced  
184 bacteria by measuring colony forming units (CFUs). In larvae we saw a significant  
185 reduction in bacterial titer in the mutant compared to both the WT (Kruskal-Wallis test;  $P$   
186  $< 0.01$ ) and the  $\Delta ompA/ompA$  complement (Kruskal-Wallis test;  $P < 0.05$ ) (Figure 4A).  
187 Similarly, in adults, there was a significant reduction in bacterial infection in the  $\Delta ompA$   
188 mutant compared to either the WT or  $\Delta ompA/ompA$  complement (Kruskal-Wallis test;  $P <$   
189  $0.001$ ) (Figure 4B). While no significant changes were seen in the prevalence of

190 infection (number of mosquitoes infected) in the larval stage (Figure 4C, Fisher's exact  
191 test; WT compared to  $\Delta ompA$   $P = 0.24$  and  $\Delta ompA$  compared to  $\Delta ompA/ompA$   $P =$   
192  $0.24$ ), in adults, the prevalence of infection was significantly different (Figure 4D,  
193 Fisher's exact test; WT compared to  $\Delta ompA$   $P < 0.0001$  and  $\Delta ompA$  compared to  
194  $\Delta ompA/ompA$   $P < 0.0001$ ), with only 45% of adults infected by the  $\Delta ompA$  mutant  
195 compared to 95% and 88% by the WT and  $\Delta ompA/ompA$  complement, respectively. We  
196 also examined the growth rates of mosquitoes administered with the WT,  $\Delta ompA$   
197 mutant and  $\Delta ompA/ompA$  complement. No significant differences were seen in the time  
198 to pupation (Figure 5A) or percentage of first instar larvae that reached adulthood  
199 (Figure 5B) between any of the strains.

200

#### 201 **Integration of genes into the *Enterobacter* chromosome.**

202 We undertook experiments to demonstrate the CRISPR/Cas9 gene-editing approaches  
203 can be used to integrate genes into the chromosome of non-model bacteria that  
204 associate with mosquitoes. We created two independent transgenic strains that had  
205 either, a gene encoding mCherry fluorescence or a gene encoding resistance to the  
206 antibiotic gentamicin, inserted into the bacterial chromosome. These genes were  
207 integrated into the genome using the same gRNA that was used for deletional  
208 mutagenesis, and as such, these insertions also disrupted the *ompA* gene. Sequencing  
209 across the integration site indicated the insertion of these genes occurred within the  
210 *ompA* gene and thereby disrupted its function (Figure 6A and 6D). Continual  
211 subculturing was undertaken for both strains and molecular analysis indicated the  
212 stability of these lines for ten generations (Figure 6B and 6E). To demonstrate the

213 integrated genes were functional, we observed expression of mCherry fluorescence and  
214 successfully cultured the strain containing gentamicin resistance on plates containing  
215 the antibiotic (Figure 6C and 6F). Finally, we infected these transgenic strains into  
216 mosquitoes to demonstrate that these strains were able to colonize the mosquito gut  
217 and functionality of the integrated gene was confirmed by observing fluorescence or by  
218 rearing the *Enterobacter ompA::gentamicin* strain in mosquitoes administered sugar  
219 supplemented with gentamicin. Fluorescent bacteria were observed in the gut of  
220 mosquitoes while no signal was seen in controls (WT *Enterobacter* infected mosquitoes)  
221 (Figure 5G). The *Enterobacter ompA::gentamicin* was successfully rescued from  
222 mosquitoes reared on gentamicin and was seen to stably infect mosquitoes over time at  
223 a density of  $1 \times 10^4$  CFUs/mosquito. Consistent with our previous finding (Figure 4B), the  
224 WT bacteria initially infected mosquitoes at higher titers (T test; day 0  $P < 0.001$ ).  
225 However, at 4 days post infection (dpi), the total bacterial load of culturable microbes in  
226 mosquitoes supplemented with WT *Enterobacter* was significantly reduced when reared  
227 on sugar supplemented with antibiotic (T test; day 4  $P < 0.05$ ), and no CFUs were  
228 recovered after at 6 dpi (T test; day 6  $P < 0.001$ ) (Figure 6H).

229 **Discussion.**

230 We harnessed the CRISPR/Cas9 gene editing system to create knockout mutants in an  
231 *Enterobacter* gut symbiont of *Ae. aegypti* mosquitoes enabling us to examine the role of  
232 bacterial genetics, specifically the *ompA* gene, in biofilm formation and gut colonization.  
233 A deletion of the *ompA* gene of *Enterobacter* decreased bacterial colonization of the  
234 mosquito host at both the larval and adult stages after infection in a mono-association.  
235 Strikingly, we found this effect was most pronounced in adult mosquitoes with more  
236 than half of the mosquitoes not possessing any culturable mutants, while there was no  
237 difference in prevalence of infection between the mutant and WT bacteria in larvae. The  
238 reduced prevalence of mutant bacteria in adults likely reflects differences in microbial  
239 colonization of each mosquito life stage. Larvae are continually subjected to bacteria in  
240 the larval water habitat while adults only have a short time frame to acquire bacteria  
241 immediately after eclosion, when they are thought to imbibe a small amount of larval  
242 water which seeds the gut with microbiota<sup>67</sup>. Our data shows greater variation in  
243 colonization of the adult stage between the mutant and WT strains, indicating that the  
244 *ompA* gene, and potentially bacterial factors in general, may be critical for colonization  
245 of the adult gut. These findings are also consistent with other sequence-based studies,  
246 that indicate adult stages have greater variability in species composition of their  
247 microbiota, while the microbiome of immature stages reflects the larval water habitat<sup>1-8</sup>.

248

249 Overall, our findings are similar to studies done in Tsetse flies whereby an *ompA* mutant  
250 of *Sodalis*, an *Enterobacteriaceae* symbiont, has impaired biofilm formation and  
251 reduced colonization rates<sup>22,23</sup>. These studies, in conjunction with our work, suggests

252 that the *ompA* gene is imperative for symbiotic associations within dipterans. It also  
253 suggests that biofilm formation may be a strategy employed by bacteria to colonize the  
254 gut of insects. In pathogenic infections in mammals, biofilms enable bacteria to colonize  
255 new niches, promote infection and are associated with virulence<sup>68,69</sup>. Although less is  
256 known regarding the importance of biofilm formation in insects, in an artificial  
257 *Pseudomonas-Drosophila* infection model, biofilm formation was associated with  
258 virulence and host survival<sup>20</sup>. In a natural symbiotic association between bean bugs and  
259 *Burkholderia*, disruption of a purine biosynthesis gene in the bacterium also reduce  
260 biofilm formation and colonization of the insect<sup>65</sup>. In mosquitoes, gut biofilm formation  
261 could also have implications for vector competence as *Chromobacterium*, which was  
262 isolated from *Aedes* mosquitoes, produced molecules that inhibited dengue virus only  
263 when grown *in vitro* as a biofilm and not when grown in a planktonic state<sup>70</sup>. However, it  
264 is unknown if biofilm formation occurred *in vivo*<sup>70</sup>. Our data provide evidence that  
265 biofilms occur within the gut of mosquitoes and facilitate host colonization.

266

267 While we have shown that the *ompA* gene of *Enterobacter* is important for host  
268 colonization, we see no evidence that deletion of this gene alters mosquito development  
269 or growth rates. This is in contrast to the *Riptortus-Burkholderia* symbiosis whereby  
270 mutation of the *purT* gene in *Burkholderia* resulted in reduced growth rates and  
271 reduction in body weight of the host compared to insects that were infected with the WT  
272 bacterium<sup>65</sup>. The difference in our study to the findings in the *Riptortus-Burkholderia*  
273 symbiosis could be related to different requirements of the bean bug compared to the  
274 mosquito host as well as the different genes mutated in the symbionts. Our findings are

275 consistent with another study in mosquitoes whereby an *ompA* mutant of *E. coli* was  
276 reported to not influence growth when a genomic mutant library was screened in *Ae.*  
277 *aegypti* in a mono-association<sup>71</sup>. Using a similar gnotobiotic system that exploits the  
278 ability to sterilize mosquito eggs and rescue development of the insect by  
279 supplementation, several recent reports describe approaches to create bacteria-free  
280 mosquitoes<sup>62,63</sup>. Here, we reared mosquitoes in a mono-association where they were  
281 only subjected to *Enterobacter*. However, more than half the adult mosquitoes  
282 inoculated with the  $\Delta ompA$  mutant were not infected by bacteria, but nevertheless, had  
283 similar development and growth rates compared to mosquito possessing WT bacteria. It  
284 would be intriguing to determine if these uninfected mosquitoes were bacteria-free. If  
285 so, the use of mutant bacteria that rescue development but cannot colonize mosquitoes  
286 may provide a simple means to create sterile bacteria-free mosquitoes.

287  
288 CRISPR/Cas9 gene editing has revolutionized genetic approaches in model bacteria<sup>32-</sup>  
289 <sup>35</sup>, and while the use of this approach is expanding to other non-model bacteria<sup>37-42</sup>, to  
290 our knowledge, there are no examples of editing undertaken in symbiotic microbes.  
291 Here we demonstrate that editing approaches functional in *E. coli* can be applied to  
292 phylogenetically related symbiotic bacteria that associate within the guts of mosquitoes.  
293 Our overall goal was to delete the *ompA* gene in *Enterobacter* and therefore we altered  
294 our editing strategy when carrying out experiments in the non-model *Enterobacter*  
295 compared to our initial attempts in *E. coli*, and as such it is difficult to compare rates of  
296 editing between bacterial species. Nevertheless, the number of mutant colonies was  
297 considerably greater in *Enterobacter* compared to *E. coli* indicating the editing approach

298 is applicable to this symbiotic *Enterobacteriaceae* bacterium. Similar to our findings, a  
299 two-plasmid CRISPR/Cas9 system, exploiting the use of  $\lambda$ -Red recombineering,  
300 developed in *E. coli* was also functional in the *Enterobacteriaceae*, *Taumella citrea*,  
301 without the need for modification<sup>36</sup>. Taken together, these findings suggest that  
302 CRISPR/Cas9-based approaches may be applicable to a wide range of  
303 *Enterobacteriaceae*. Similar to the original study in *E. coli*<sup>35</sup>, we observed  
304 counterselection escapees in our editing experiments. The no-SCAR approach uses a  
305 counterselectoin method to edit bacteria and cells that possess both the Cas9 and the  
306 gRNA should not be viable as a result of double stranded breaks in their genome. As  
307 the genetic basis of counterselection escape remains unclear and our primary objective  
308 was to create a mutant strain, we did not pursue the mechanism behind these escapees  
309 further.

310  
311 Previous integration attempts in *E. coli* using the no-SCAR approach inserted a small  
312 fragment (80 bp) into the bacterial genome<sup>35</sup>. It was hypothesized however, that this  
313 approach could be used to integrate larger sized fragments over 1 kb into the genome  
314 based on the efficiency of integration and counterselection escape rates, although  
315 screening would be required<sup>35</sup>. Here we demonstrate this is indeed feasible as we  
316 inserted 1.3 kb and 1.5 kb fragments into the *Enterobacter* genome, and importantly,  
317 these genes, driven by the AmTr promoter<sup>72</sup>, were functional both *in vitro* and *in vivo*.  
318 Our work expands the list of bacteria amenable to CRISPR/Cas9 based genome editing  
319 approaches and provides an elegant tool to investigate specific bacterial genes that  
320 influence host-microbe interactions in mosquito vectors.

321

322 The application of CRISPR/Cas9 genome editing to gut-associated bacteria of  
323 mosquitoes has significant applied potential. Paratransgenesis strategies are being  
324 evaluated in a range of medical and agricultural systems to mitigate pathogen  
325 transmission from insect vectors, however, most approaches engineer symbionts by  
326 plasmid transformation<sup>47-55</sup> and where genome integration has been accomplished in  
327 symbionts<sup>56-61</sup>, it has been done with technologies that did not allow for site specific  
328 integration. Here, we demonstrate site-specific integration of transgenes into the  
329 bacterial symbiont genome. Paratransgenic approaches suitable for use in the field will  
330 need to stably integrate genes into the bacterial genome in a manner that does not  
331 compromise bacterial fitness. As such, the use of CRISPR/Cas9 to engineer specific  
332 sites in the bacterial genome, such as intergenic regions within the genome, will  
333 undoubtedly be beneficial for these applied approaches.

334

335 In summary, we have demonstrated that the CRISPR/Cas9 gene editing system can be  
336 applied to non-model symbiotic bacteria that associate with eukaryotic hosts to  
337 interrogate the role of bacterial genes in host-microbe associations. We created  
338 knockout and knockin mutants by deleting and disrupting the *ompA* gene of  
339 *Enterobacter*. The knockout mutant displayed a reduced ability to form biofilms and  
340 colonize the gut of *Ae. aegypti* mosquitoes in a mono-association, demonstrating  
341 bacterial genetic factors are important determinants that influence colonization of  
342 mosquito guts. *Aedes* mosquitoes are becoming powerful systems to investigate the  
343 genetics of host-microbe interactions given the scientific community has simple and



344 efficient approaches to alter both the microbes (this study) and mosquito host  
345 genome<sup>73,74</sup> at their disposal, as well as methods to create mono-associated bacterial  
346 lines<sup>64</sup>. Finally, rapid, efficient, and site specific gene editing approaches for gut bacteria  
347 that associate with mosquitoes will facilitate the development of novel paratransgenic  
348 approaches to control arthropod-borne disease.

## 349 **Materials and Methods**

350 **Bacterial and mosquito strains.** *E. coli* BL21(DE3) (NEB) and an *Enterobacter* strain  
351 previous isolated from a lab-reared colony of *Ae. albopictus* (Galveston) mosquitoes<sup>7</sup>  
352 were used in this study. Cultures were grown in liquid LB media at 37°C with the  
353 appropriate antibiotic unless stated otherwise. Mosquitoes were reared in the UTMB  
354 insectary under conventional conditions or in mono-associations (described below).

355

356 **CRISPR gene editing.** Editing the *ompA* gene of *E. coli* and *Enterobacter*  
357 (Supplementary Table 1) was complete as described in Reisch and Prather<sup>35</sup>. The  
358 photospacer sequence for the *ompA* gene was designed using the CHOPCHOP<sup>75</sup>, and  
359 cloned into pKDsgRNA-ack plasmid<sup>35</sup> directly upstream of gRNA scaffold using  
360 REPLACR mutagenesis protocol<sup>76</sup> (Supplementary Table 2). The plasmids were  
361 acquired from Addgene (Supplementary Table 1; Addgene plasmid 62655 and 62654).  
362 The resulting plasmids pKDsgRNA-Ec-*ompA* and pKDsgRNA-Ent-*ompA* were Sanger  
363 sequenced to confirm insertion of photospacer sequence. These plasmids were then  
364 transformed into either *E. coli* or *Enterobacter* containing the pCas9-CR4 plasmid.  
365 Transformants were selected at 30°C on LB agar plate containing spectinomycin (50  
366 µg/mL), chloramphenicol (34 µg/mL), and with or without anhydrotetracycline (aTC) at  
367 100ng/mL. Colonies from the –aTC plate were grown overnight in LB broth with the  
368 appropriate antibiotic at 30°C. A 1:100 diluted overnight culture was (grown until 0.4  
369 OD<sub>600</sub>) supplemented with 1.2% arabinose to induce the expression of λ-Red  
370 recombinase. Cells were then transformed with 1-1.5 µg of double stranded donor DNA  
371 that flanked the PAM site for homologous recombination. Donor DNA was created by

372 either PCR amplification or by gene synthesis (Genewiz). Regardless of the method of  
373 construction, each donor had flanking regions of 250 bp homologous to the target DNA.  
374 The resulting colonies were screened for mutations by colony PCR with primers flanking  
375 the integration site and positive clones were Sanger sequenced. Positive colonies were  
376 grown in LB broth and genomic DNA was isolated. For further validation, the flanking  
377 regions of deletion or insertions were amplified and the PCR product Sanger  
378 sequenced.

379

380 **Stability of insertion.** The stability of the knockout  $\Delta ompA$  mutant and the knockin  
381  $ompA::gentamicin$  and  $ompA::mCherry$  strains was assessed in LB medium. The  
382  $ompA::mCherry$  and knockout  $\Delta ompA$  mutant cultures were grown for 10 passages in  
383 LB broth. At each passage 40  $\mu$ l of culture was transferred into 4ml fresh LB medium.  
384 The  $ompA::gentamicin$  strain was grown with or without gentamicin (50  $\mu$ g/mL).  
385 Genomic DNA was isolated from the 0, 2, 4, 6, 8 and 10<sup>th</sup> subculture and PCR that  
386 amplified across the integration site was performed.

387

388 **Complementation of *ompA* mutant.** Functional rescue of the *ompA* mutation was  
389 achieved by complementing the mutant with the WT gene. The WT *ompA* gene was  
390 amplified from *Enterobacter* genomic DNA and cloned into the pRAM-mCherry vector<sup>7</sup>  
391 and thereby creating pRAM-mCherry-*Ent-OmpA*. The Sanger sequence-verified  
392 plasmid was transformed into the  $\Delta ompA$  mutant, thereby generating the  $\Delta ompA/ompA$   
393 complement strain. Colonies that acquired the plasmid were selected on LB plates  
394 containing kanamycin (50  $\mu$ g/mL).

395

396 ***In vitro* characterization of *Enterobacter* strains.** To assess the impact of the gene  
397 deletion on bacterial growth the WT,  $\Delta ompA$  mutant and  $\Delta ompA/ompA$  complement  
398 were grown in LB broth and the density of bacteria (OD<sub>600</sub>) was quantified by  
399 spectrophotometer. A 1:100 dilution of an overnight culture was inoculated into a 5 ml  
400 LB broth in 50 ml tube and incubated at 37°C for 24 hrs. At 2, 4, 6, 8, 10, 12 and 24  
401 hours growth was recorded at OD<sub>600</sub>. The biofilm assay was performed as described  
402 previously<sup>77,78</sup>. Briefly, biofilm formation by *Enterobacter* strains was quantified on  
403 polystyrene microtiter plates after 72 h of incubation at 37°C by CV staining. Three  
404 independent experiments were performed, and the data were represented as CV OD<sub>570</sub>  
405 after normalizing by CFUs.

406

407 **Mosquito infections.** Mono-association in *Ae. aegypti* mosquitoes were done using  
408 gnotobiotic infection procedure<sup>64</sup>, with slight modifications<sup>7</sup>. Briefly, mosquito eggs were  
409 sterilized for 5 min in 70% ethanol, 3 min 3% bleach+0.01% Coverage Plus NPD (Steris  
410 Corp.), 5 min in 70% ethanol then rinsed three times in sterile water. Eggs were  
411 vacuumed hatched for 30-45 min and left overnight at room temperature to hatch any  
412 remaining eggs. Exactly twenty L1 larvae were transferred to T175 flask containing 60  
413 ml of sterile water and fed on alternative days with 60 µl of fish food (1 µg/µl). Larvae  
414 were inoculated with 1x10<sup>7</sup>/ml of either the WT *Enterobacter*, the  $\Delta ompA$  mutant or the  
415  $\Delta ompA/ompA$  complement. The WT and  $\Delta ompA$  strains were transformed with the  
416 pRAM-mCherry plasmid that conferred resistance to kanamycin (but did not possess a  
417 functional *ompA* gene). L4 larvae were collected, washed three times with 1X PBS, and

418 then homogenized in 500  $\mu$ l of 1X PBS and 50  $\mu$ l of homogenate was plated on LB agar  
419 containing 50  $\mu$ g/mL kanamycin. Similarly, adult mosquitoes were collected 3-4 days  
420 post emergence and bacterial infection was quantified in the same manner as larvae. In  
421 order to assess the growth of the mosquitoes, time to pupation and growth rate were  
422 observed. Time to pupation was determined by quantifying the number of pupae each  
423 day post hatching, while survival to adulthood was calculated by quantifying the number  
424 of L1 larvae that reached adulthood. The experiment was repeated three times.

425  
426 Knock-in mutants were administered to adult *Ae. aegypti* in a sugar meal. Three to four  
427 day old mosquitoes were fed with  $1 \times 10^7$  of WT or the  $\Delta ompA::gentamicin$  strain for  
428 three days in 10% sucrose solution. After three days, mosquitoes were either  
429 administered sugar supplemented with gentamicin (50  $\mu$ g/mL) or sugar without  
430 antibiotic. CFUs were determined at days 0, 2, 4, and 6 dpi by plating homogenized  
431 mosquitoes (N=10) on LB agar. Similarly, the  $\Delta ompA::mCherry$  and WT *Enterobacter*  
432 were fed to mosquitoes and midguts were dissected to assess the colonization of  
433 bacteria in the tissue. For visualization of bacteria, midguts were fixed in 1%  
434 paraformaldehyde (PFA) in 1X PBS for 30 minutes and permeabilized with 0.01% Triton  
435 X-100 in 1X PBS for 20 min. The tissues were stained with 1:250 diluted Phalloidin  
436 (Sigma) for 20 minutes and samples were washed twice with 1X PBS for 10 minutes.  
437 Finally, midguts were then stained with 1:500 diluted DAPI (Invitrogen) for 10 min.  
438 Samples were transferred to slides and mounted with ProLong™ Gold Antifade  
439 (Invitrogen). The slides were observed under Revolve FL (ECHOLAB).

440

441 **Acknowledgements.**

442 We would like to thank the UTMB insectary core for providing mosquitoes. GLH was  
443 supported by NIH grants (R21AI138074, R21AI124452 and R21AI129507), a University  
444 of Texas Rising Star award, the Western Gulf Center of Excellence for Vector-borne  
445 Diseases (CDC grant CK17-005), the Robert J. and Helen Kleberg Foundation and the  
446 Gulf Coast Consortia. This work was also supported by a James W. McLaughlin  
447 postdoctoral fellowship at the University of Texas Medical Branch to SH and a Dutsadi  
448 Piphat Scholarship and Thailand Research Chair Grant from NSTDA (p-15-50004) to  
449 PN. We also wish to thank Dr Ulrike Munderloh (University of Minnesota) for the kind  
450 gift of the pRAM plasmid.

451

452 **Competing interests.**

453 The authors declare no competing interests.

454

455 **Figure legends.**

456

457 **Figure 1. Midgut infection of *Enterobacter* and *E. coli* in mono-associations of**  
458 ***Aedes* mosquitoes.** *Enterobacter* forms a biofilm in the gut of *Aedes aegypti*  
459 mosquitoes (left) while no bacteria were observed in the gut of mosquitoes reared with  
460 *E. coli* under gnotobiotic conditions (right). Bacteria possessed a plasmid expressing  
461 mCherry. Blue – host nuclei. Green – host actin cytoskeleton stained with phalloidin.  
462 The scale bar is 70  $\mu\text{m}$ .

463

464 **Figure 2. CRISPR/Cas9 genome editing in bacteria.** A schematic of the editing  
465 approach and screening of putative mutants in *E. coli* (A) and *Enterobacter* (B). A ~1kb  
466 fragment of *E. coli* BL21(DE3) was deleted using no-SCAR protocol. The 250 bp of left  
467 arm (LA) and right arm (RA) was assembled to generate 500 bp donor DNA. The  
468 transformants were screened via colony PCR with primers binding in regions flanking  
469 the deletion. Similar to strategy employed in *E. coli*, knockout of the *ompA* gene from  
470 *Enterobacter* isolated from the mosquito gut was created by deleting the 598 bp  
471 fragment. The green star indicates the PAM site in the *ompA* gene. (C) The sequence of  
472 the *ompA* mutation in *E. coli* and *Enterobacter* was confirmed by Sanger sequencing.  
473 The sequence above the gene within the dotted line has been deleted. The  
474 chromatogram shows the 10 bp flanking the deletion.

475

476 **Figure 3. In vitro characterization of the *ompA* mutation.** The *Enterobacter*  $\Delta ompA$   
477 mutant had a similar growth rate compared to both the WT and the  $\Delta ompA/ompA$

478 complement in liquid LB media (A). The stability of mutant was evaluated *in vitro* by  
479 continuous subculturing in LB medium (B). Genomic DNA of alternative subcultures was  
480 used as template for PCR using gene specific primers that amplified across the  
481 deletion. Two separate gel images were merged to create the figure 2B. Passage 8 was  
482 run on a separate gel to passages 0 – 6. Biofilm formation was assessed using the CV  
483 biofilm assay for the WT,  $\Delta ompA$  mutant and the  $\Delta ompA/ompA$  complement (C).  
484 Quantification of the relative biofilm formation normalized by the number of bacteria per  
485 well (D).

486

487 **Figure 4. The  $\Delta ompA$  mutant poorly infected mosquitoes.** Infection of *Enterobacter*  
488 strains (WT,  $\Delta ompA$  mutant and  $\Delta ompA/ompA$  complement) reared in a mono-  
489 association using a gnotobiotic rearing approach for larvae (A) and adults (B). L4 and 3-  
490 4 days post emergence adults were screened for bacterial load by plating on LB media  
491 to quantify the bacteria. The prevalence of infection (number of mosquitoes infected)  
492 between the treatments was calculated comparing number of infected to uninfected  
493 larvae (C) or adults (D).

494

495 **Figure 5. The  $\Delta ompA$  mutant does not affect growth rates or development of**  
496 **mosquitoes.** The growth rate (time to pupation) (A) and development (percentage of L1  
497 larvae to reach adulthood) (B) was observed in mosquitoes infected with *Enterobacter*  
498 strains (WT,  $\Delta ompA$  mutant and  $\Delta ompA/ompA$  complement) reared in a mono-  
499 association.

500



501 **Figure 6. Integration of mCherry and gentamicin into the *Enterobacter* genome.**

502 Sanger sequence across the integration site, stability of the inserted gene and *in vitro*  
503 expression of the inserted gene for the  $\Delta ompA::mCherry$  (A-C) and the  $\Delta ompA::$   
504 gentamicin (D-F) strains. The chromatogram shows the sequence spanning the inserted  
505 sites. Strains were continually subcultured for 10 passages and PCR was done to  
506 examine the stability of the insert (B;  $\Delta ompA::mCherry$  plus WT; E  $\Delta ompA::gentamicin$   
507 passaged with (ab+) or without (ab-) gentamicin plus WT). mCherry fluorescence or  
508 ability to grow on selective media containing gentamicin confirmed the expression of the  
509 transgene *in vitro*. Mosquitoes were inoculated with the *Enterobacter* strains to confirm  
510 expression of the transgene *in vivo*. Dissected midgut infected with  $\Delta ompA::mCherry$   
511 (left) or negative control (right; WT bacteria without expression plasmid) (G). Midguts  
512 were stained with phalloidin (green) and DAPI (blue). The scale bar is 30  $\mu$ M. The WT  
513 and  $\Delta ompA::gentamicin$  *Enterobacter* strains were fed to adult mosquitoes for 3 days in  
514 a sugar meal before gentamicin was administered to mosquitoes in a sugar meal (H).  
515 Mosquitoes were collected every second day and CFUs assessed. Pairwise  
516 comparisons were conducted at each time point using a T test (\* -  $P < 0.05$ , \*\*\*  $P <$   
517  $0.001$ , \*\*\*\*  $P < 0.0001$ ).

518

519 **References.**

520

- 521 1. Osei-Poku, J., Mbogo, C. M., Palmer, W. J. & Jiggins, F. M. Deep sequencing  
522 reveals extensive variation in the gut microbiota of wild mosquitoes from Kenya.  
523 *Mol Ecol* **21**, 5138–5150 (2012).
- 524 2. Boissière, A. *et al.* Midgut microbiota of the malaria Mosquito vector *Anopheles*  
525 *gambiae* and interactions with *Plasmodium falciparum* Infection. *PLoS Pathog* **8**,  
526 e1002742 (2012).
- 527 3. David, M. R., Santos, L. M. B. D., Vicente, A. C. P. & Maciel-de-Freitas, R. Effects  
528 of environment, dietary regime and ageing on the dengue vector microbiota:  
529 evidence of a core microbiota throughout *Aedes aegypti* lifespan. *Mem Inst*  
530 *Oswaldo Cruz* **111**, 577–587 (2016).
- 531 4. Muturi, E. J., Kim, C.-H., Bara, J., Bach, E. M. & Siddappaji, M. H. *Culex pipiens*  
532 and *Culex restuans* mosquitoes harbor distinct microbiota dominated by few  
533 bacterial taxa. *Parasit Vectors* **9**, 18 (2016).
- 534 5. Hughes, G. L. *et al.* Native microbiome impedes vertical transmission of  
535 *Wolbachia* in *Anopheles* mosquitoes. *Proc Natl Acad Sci USA* **111**, 12498–12503  
536 (2014).
- 537 6. Coon, K. L., Brown, M. R. & Strand, M. R. Mosquitoes host communities of  
538 bacteria that are essential for development but vary greatly between local  
539 habitats. *Mol Ecol* **25**, 5806–5826 (2016).
- 540 7. Hegde, S. *et al.* Microbiome interaction networks and community structure from  
541 lab-reared and field-collected *Aedes aegypti*, *Aedes albopictus*, and *Culex*  
542 *quinquefasciatus* mosquito vectors. *bioRxiv* 1–56 (2018). doi:10.1101/337311
- 543 8. Wang, Y., Gilbreath, T. M., Kukutla, P., Yan, G. & Xu, J. Dynamic gut microbiome  
544 across life history of the malaria mosquito *Anopheles gambiae* in Kenya. *PLoS*  
545 *ONE* **6**, e24767–9 (2011).
- 546 9. Weiss, B. L. & Aksoy, S. Microbiome influences on insect host vector  
547 competence. *Trends Parasitol* **27**, 514–522 (2011).
- 548 10. Hegde, S., Rasgon, J. L. & Hughes, G. L. The microbiome modulates arbovirus  
549 transmission in mosquitoes. *Current Opinion in Virology* **15**, 97–102 (2015).
- 550 11. Saldaña, M. A., Hegde, S. & Hughes, G. L. Microbial control of arthropod-borne  
551 disease. *Mem Inst Oswaldo Cruz* **112**, 81–93 (2017).
- 552 12. Audsley, M. D., Ye, Y. H. & McGraw, E. A. The microbiome composition of *Aedes*  
553 *aegypti* is not critical for *Wolbachia*-mediated inhibition of dengue virus. *PLoS*  
554 *Negl Trop Dis* **11**, e0005426 (2017).
- 555 13. Muturi, E. J., Bara, J. J., Rooney, A. P. & Hansen, A. K. Midgut fungal and  
556 bacterial microbiota of *Aedes triseriatus* and *Aedes japonicus* shift in response to  
557 La Crosse virus infection. *Mol Ecol* **25**, 4075–4090 (2016).
- 558 14. Stathopoulos, S., Neafsey, D. E., Lawniczak, M. K. N., Muskavitch, M. A. T. &  
559 Christophides, G. K. Genetic dissection of *Anopheles gambiae* gut epithelial  
560 responses to *Serratia marcescens*. *PLoS Pathog* **10**, e1003897 (2014).
- 561 15. Xiao, X. *et al.* A mesh-duox pathway regulates homeostasis in the insect gut. *Nat.*  
562 *Microbiol* **2**, 17020 (2017).

- 563 16. Pang, X. *et al.* Mosquito C-type lectins maintain gut microbiome homeostasis.  
564 *Nat. Microbiol* **1**, 16023 (2016).
- 565 17. Short, S. M., Mongodin, E. F., MacLeod, H. J., Talyuli, O. A. C. & Dimopoulos, G.  
566 Amino acid metabolic signaling influences *Aedes aegypti* midgut microbiome  
567 variability. *PLoS Negl Trop Dis* **11**, e0005677–29 (2017).
- 568 18. Kumar, S., Molina-Cruz, A., Gupta, L., Rodrigues, J. & Barillas-Mury, C. A  
569 peroxidase/dual oxidase system modulates midgut epithelial immunity in  
570 *Anopheles gambiae*. *Science* **327**, 1644–1648 (2010).
- 571 19. Powell, J. E., Leonard, S. P., Kwong, W. K., Engel, P. & Moran, N. A. Genome-  
572 wide screen identifies host colonization determinants in a bacterial gut symbiont.  
573 *Proc Natl Acad Sci USA* **113**, 13887–13893 (2016).
- 574 20. Mulcahy, H., Sibley, C. D., Surette, M. G. & Lewenza, S. *Drosophila melanogaster*  
575 as an animal model for the study of *Pseudomonas aeruginosa* biofilm infections *in*  
576 *vivo*. *PLoS Pathog* **7**, e1002299–14 (2011).
- 577 21. Maltz, M. & Graf, J. The type II secretion system is essential for erythrocyte lysis  
578 and gut colonization by the leech digestive tract symbiont *Aeromonas veronii*.  
579 *Appl Environ Microbiol* **77**, 597–603 (2011).
- 580 22. Weiss, B. L., Wu, Y., Schwank, J. J., Tolwinski, N. S. & Aksoy, S. An insect  
581 symbiosis is influenced by bacterium-specific polymorphisms in outer-membrane  
582 protein A. *Proc Natl Acad Sci USA* **105**, 15088–15093 (2008).
- 583 23. Maltz, M. A., Weiss, B. L., O'Neill, M., Wu, Y. & Aksoy, S. OmpA-mediated biofilm  
584 formation is essential for the commensal bacterium *Sodalis glossinidius* to  
585 colonize the tsetse fly gut. *Appl Environ Microbiol* **78**, 7760–7768 (2012).
- 586 24. Riehle, M. A., Moreira, C. K., Lampe, D., Lauzon, C. & Jacobs-Lorena, M. Using  
587 bacteria to express and display anti-*Plasmodium* molecules in the mosquito  
588 midgut. *Int J Parasitol* **37**, 595–603 (2007).
- 589 25. Dennison, N. J. *et al.* Functional genomic analyses of *Enterobacter*, *Anopheles*  
590 and *Plasmodium* reciprocal interactions that impact vector competence. *Malar J*  
591 **15**, 425 (2016).
- 592 26. Pei, D. *et al.* The *waaL* gene mutation compromised the inhabitation of  
593 *Enterobacter* sp. Ag1 in the mosquito gut environment. *Parasit Vectors* **8**, 1–10  
594 (2015).
- 595 27. Enomoto, S., Chari, A., Clayton, A. L. & Dale, C. Quorum sensing attenuates  
596 virulence in *Sodalis praecaptivus*. *Cell Host Microbe* **21**, 629–636.e5 (2017).
- 597 28. Dale, C., Young, S. A., Haydon, D. T. & Welburn, S. C. The insect endosymbiont  
598 *Sodalis glossinidius* utilizes a type III secretion system for cell invasion. *Proc Natl*  
599 *Acad Sci USA* **98**, 1883–1888 (2001).
- 600 29. Selle, K. & Barrangou, R. Harnessing CRISPR-Cas systems for bacterial genome  
601 editing. *Trends Microbiol* **23**, 225–232 (2015).
- 602 30. Barrangou, R. & van Pijkeren, J. P. Exploiting CRISPR-Cas immune systems for  
603 genome editing in bacteria. *Curr Opin Biotechnol* **37**, 61–68 (2016).
- 604 31. Sander, J. D. & Joung, J. K. CRISPR-Cas systems for editing, regulating and  
605 targeting genomes. *Nat Biotechnol* **32**, 347–355 (2014).
- 606 32. Jiang, W., Bikard, D., Cox, D., Zhang, F. & Marraffini, L. A. RNA-guided editing of  
607 bacterial genomes using CRISPR-Cas systems. *Nat Biotechnol* **31**, 233–239  
608 (2013).

- 609 33. Ronda, C., Pedersen, L. E., Sommer, M. O. A. & Nielsen, A. T. CRMAGE:  
610 CRISPR Optimized MAGE Recombineering. *Sci Rep* **6**, 19452 (2016).
- 611 34. Li, Y. *et al.* Metabolic engineering of *Escherichia coli* using CRISPR–Cas9  
612 mediated genome editing. *Metabolic Engineering* **31**, 13–21 (2015).
- 613 35. Reisch, C. R. & Prather, K. L. J. The no-SCAR (Scarless Cas9 Assisted  
614 Recombineering) system for genome editing in *Escherichia coli*. *Sci Rep* **5**, 15096  
615 (2015).
- 616 36. Jiang, Y. *et al.* Multigene Editing in the *Escherichia coli* Genome via the CRISPR-  
617 Cas9 System. *Appl Environ Microbiol* **81**, 2506–2514 (2015).
- 618 37. Tong, Y., Robertsen, H. L., Blin, K., Weber, T. & Lee, S. Y. CRISPR-Cas9 toolkit  
619 for *Actinomyce* Genome Editing. *Methods Mol Biol* **1671**, 163–184 (2018).
- 620 38. Li, K., Cai, D., Wang, Z., He, Z. & Chen, S. Development of an efficient genome  
621 editing tool in *Bacillus licheniformis* using CRISPR-Cas9 nickase. *Appl Environ*  
622 *Microbiol* AEM.02608–17 (2018). doi:10.1128/AEM.02608-17
- 623 39. Mougias, I. *et al.* Efficient genome editing of a facultative thermophile using  
624 mesophilic spCas9. *ACS Synth Biol* **6**, 849–861 (2017).
- 625 40. Oh, J.-H. & van Pijkeren, J. P. CRISPR-Cas9-assisted recombineering in  
626 *Lactobacillus reuteri*. *Nucleic Acids Res* **42**, e131–e131 (2014).
- 627 41. Cobb, R. E., Wang, Y. & Zhao, H. High-efficiency multiplex genome editing of  
628 *Streptomyces* species using an engineered CRISPR/Cas System. *ACS Synth Biol*  
629 **4**, 723–728 (2014).
- 630 42. Jiang, Y. *et al.* CRISPR-Cpf1 assisted genome editing of *Corynebacterium*  
631 *glutamicum*. *Nat Commun* **8**, 15179 (2017).
- 632 43. Waller, M. C., Bober, J. R., Nair, N. U. & Beisel, C. L. Toward a genetic tool  
633 development pipeline for host-associated bacteria. *Curr Opin Microbiol* **38**, 156–  
634 164 (2017).
- 635 44. Wilke, A. B. B. & Marrelli, M. T. Paratransgenesis: a promising new strategy for  
636 mosquito vector control. *Parasit Vectors* **8**, 391–19 (2015).
- 637 45. Arora, A. K. & Douglas, A. E. Hype or opportunity? Using microbial symbionts in  
638 novel strategies for insect pest control. *J Insect Physiol* **103**, 10–17 (2017).
- 639 46. Ricci, I. *et al.* Mosquito/microbiota interactions: from complex relationships to  
640 biotechnological perspectives. *Curr Opin Microbiol* **15**, 278–284 (2012).
- 641 47. Bisi, D. C. & Lampe, D. J. Secretion of anti-*Plasmodium* effector proteins from a  
642 natural *Pantoea* agglomerans isolate by using *PeIB* and *HlyA* secretion signals.  
643 *Appl Environ Microbiol* **77**, 4669–4675 (2011).
- 644 48. Bextine, B., Lauzon, C., Potter, S., Lampe, D. & Miller, T. A. Delivery of a  
645 genetically marked *Alcaligenes* sp. to the glassy-winged sharpshooter for use in a  
646 paratransgenic control strategy. *Curr Microbiol* **48**, 327–331 (2004).
- 647 49. Beard, C. B., Mason, P. W., Aksoy, S., Tesh, R. B. & Richards, F. F.  
648 Transformation of an insect symbiont and expression of a foreign gene in the  
649 Chagas' disease vector *Rhodnius prolixus*. *American Journal of Epidemiology* **46**,  
650 195–200 (1992).
- 651 50. Durvasula, R. V. *et al.* Expression of a functional antibody fragment in the gut of  
652 *Rhodnius prolixus* via transgenic bacterial symbiont *Rhodococcus rhodnii*. *Med*  
653 *Vet Entomol* **13**, 115–119 (1999).
- 654 51. Wang, S. *et al.* Fighting malaria with engineered symbiotic bacteria from vector

- 655 mosquitoes. *Proc Natl Acad Sci USA* **109**, 12734–12739 (2012).
- 656 52. Favia, G. *et al.* Bacteria of the genus *Asaia* stably associate with *Anopheles*  
657 *stephensi*, an Asian malarial mosquito vector. *Proc Natl Acad Sci USA* **104**,  
658 9047–9051 (2007).
- 659 53. Hughes, G. L. *et al.* Identification of yeast associated with the planthopper,  
660 *Perkinsiella saccharicida*: potential applications for Fiji leaf gall control. *Curr*  
661 *Microbiol* **63**, 392–401 (2011).
- 662 54. Medina, F., Li, H., Vinson, S. B. & Coates, C. J. Genetic transformation of midgut  
663 bacteria from the Red Imported Fire Ant (*Solenopsis invicta*). *Curr Microbiol* **58**,  
664 478–482 (2009).
- 665 55. Hurwitz, I., Hillesland, H., Fieck, A., Das, P. & Durvasula, R. The paratransgenic  
666 sand fly: a platform for control of *Leishmania* transmission. *Parasit Vectors* **4**, 82  
667 (2011).
- 668 56. Pittman, G. W., Brumbley, S. M., Allsopp, P. G. & O'Neill, S. L. Assessment of gut  
669 bacteria for a paratransgenic approach to control *Dermolepida albohirtum* Larvae.  
670 *Appl Environ Microbiol* **74**, 4036–4043 (2008).
- 671 57. Tikhe, C. V., Martin, T. M., Howells, A., Delatte, J. & Husseneder, C. Assessment  
672 of genetically engineered *Trabulsiella odontotermis* as a 'Trojan Horse' for  
673 paratransgenesis in termites. *BMC Microbiol* 1–11 (2016). doi:10.1186/s12866-  
674 016-0822-4
- 675 58. Bextine, B., Lampe, D., Lauzon, C., Jackson, B. & Miller, T. A. Establishment of a  
676 genetically marked insect-derived symbiont in multiple host plants. *Curr Microbiol*  
677 **50**, 1–7 (2005).
- 678 59. Pontes, M. H. & Dale, C. Lambda red-mediated genetic modification of the insect  
679 endosymbiont *Sodalis glossinidius*. *Appl Environ Microbiol* **77**, 1918–1920 (2011).
- 680 60. Wang, S. *et al.* Driving mosquito refractoriness to *Plasmodium falciparum* with  
681 engineered symbiotic bacteria. *Science* **357**, 1399–1402 (2017).
- 682 61. Dotson, E. M., Plikaytis, B., Shinnick, T. M., Durvasula, R. V. & Beard, C. B.  
683 Transformation of *Rhodococcus rhodnii*, a symbiont of the Chagas disease vector  
684 *Rhodnius prolixus*, with integrative elements of the L1 mycobacteriophage. *Infect*  
685 *Genet Evol* **3**, 103–109 (2003).
- 686 62. Correa, M. A., Brackney, D. E. & Steven, B. Axenic *Aedes aegypti* develop  
687 without live bacteria, but exhibit delayed development and reduced oviposition.  
688 *bioRxiv* 264978 (2018). doi:10.1101/264978
- 689 63. Valzania, L. *et al.* Both living bacteria and eukaryotes in the mosquito gut promote  
690 growth of larvae. *PLoS Negl Trop Dis* **12**, e0006638 (2018).
- 691 64. Coon, K. L., Vogel, K. J., Brown, M. R. & Strand, M. R. Mosquitoes rely on their  
692 gut microbiota for development. *Mol Ecol* **23**, 2727–2739 (2014).
- 693 65. Kim, J. K. *et al.* Purine biosynthesis, biofilm formation, and persistence of an  
694 insect-microbe gut symbiosis. *Appl Environ Microbiol* **80**, 4374–4382 (2014).
- 695 66. Wang, H. H. *et al.* Programming cells by multiplex genome engineering and  
696 accelerated evolution. *Nature* **460**, 894–898 (2009).
- 697 67. Lindh, J. M., Borg-Karlson, A.-K. & Faye, I. Transstadial and horizontal transfer of  
698 bacteria within a colony of *Anopheles gambiae* (Diptera: Culicidae) and  
699 oviposition response to bacteria-containing water. *Acta Trop* **107**, 242–250  
700 (2008).

- 701 68. Ribet, D. & Cossart, P. How bacterial pathogens colonize their hosts and invade  
702 deeper tissues. *Microbes Infect* **17**, 173–183 (2015).
- 703 69. Hall-Stoodley, L., Costerton, J. W. & Stoodley, P. Bacterial biofilms: from the  
704 natural environment to infectious diseases. *Nat Rev Micro* **2**, 95–108 (2004).
- 705 70. Ramirez, J. L. *et al.* *Chromobacterium* Csp\_P reduces malaria and dengue  
706 infection in vector mosquitoes and has entomopathogenic and in vitro anti-  
707 pathogen activities. *PLoS Pathog* **10**, e1004398 (2014).
- 708 71. Valzania, L., Coon, K. L., Vogel, K. J., Brown, M. R. & Strand, M. R. Hypoxia-  
709 induced transcription factor signaling is essential for larval growth of the mosquito  
710 *Aedes aegypti*. *Proc Natl Acad Sci USA* **115**, 457–465 (2018).
- 711 72. Burkhardt, N. Y. *et al.* Development of Shuttle Vectors for Transformation of  
712 Diverse Rickettsia Species. *PLoS ONE* **6**, e29511 (2011).
- 713 73. Chaverra-Rodriguez, D. *et al.* Targeted delivery of CRISPR-Cas9  
714 ribonucleoprotein into arthropod ovaries for heritable germline gene editing. *Nat*  
715 *Commun* 1–11 (2018). doi:10.1038/s41467-018-05425-9
- 716 74. Li, M. *et al.* Germline Cas9 expression yields highly efficient genome engineering  
717 in a major worldwide disease vector, *Aedes aegypti*. *Proc Natl Acad Sci USA* **114**,  
718 E10540–E10549 (2017).
- 719 75. Labun, K., Montague, T. G., Gagnon, J. A., Thyme, S. B. & Valen, E.  
720 CHOPCHOP v2: a web tool for the next generation of CRISPR genome  
721 engineering. *Nucleic Acids Res* **44**, W272–6 (2016).
- 722 76. Trehan, A. *et al.* REPLACR-mutagenesis, a one-step method for site-directed  
723 mutagenesis by recombineering. *Sci Rep* **6**, 51–9 (2016).
- 724 77. O'Toole, G. A. & Kolter, R. Flagellar and twitching motility are necessary for  
725 *Pseudomonas aeruginosa* biofilm development. *Mol Microbiol* **30**, 295–304  
726 (1998).
- 727 78. Kozlova, E. V., Khajanchi, B. K., Popov, V. L., Wen, J. & Chopra, A. K. Impact of  
728 QseBC system in c-di-GMP-dependent quorum sensing regulatory network in a  
729 clinical isolate SSU of *Aeromonas hydrophila*. *Microb. Pathog.* **53**, 115–124  
730 (2012).
- 731

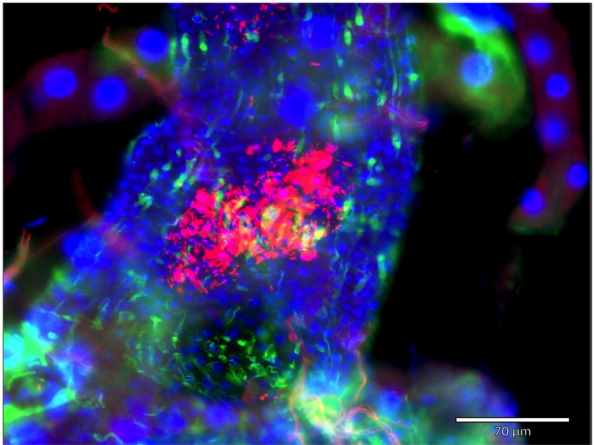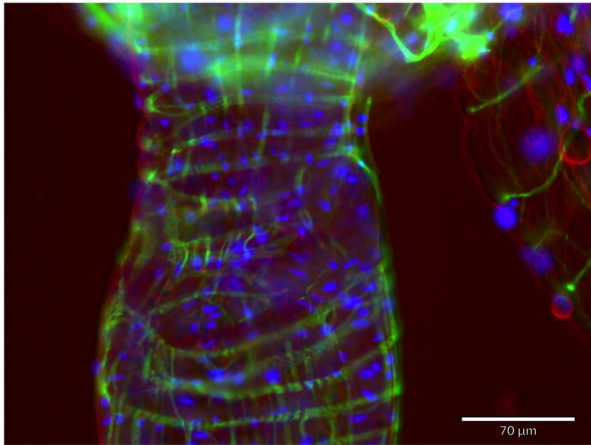

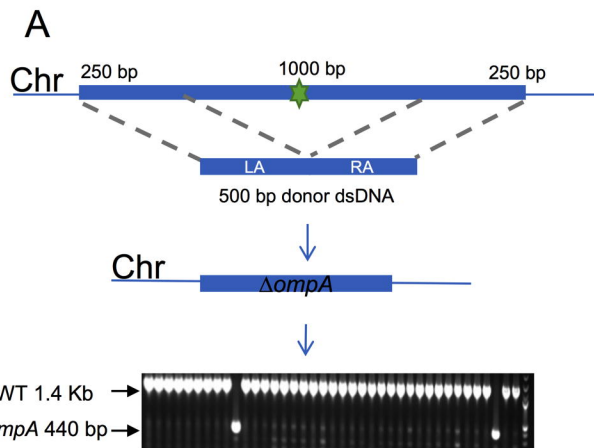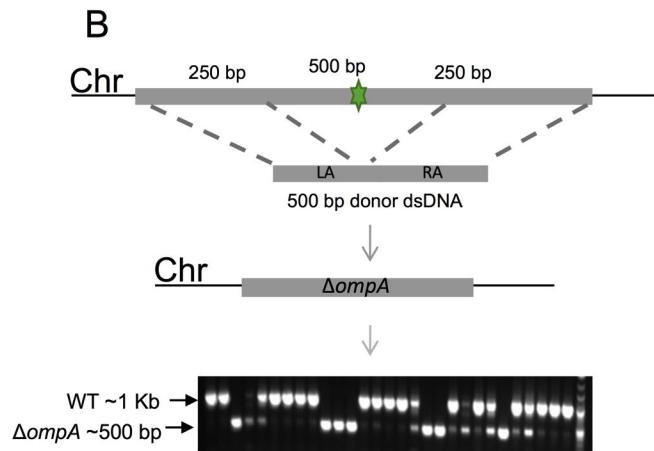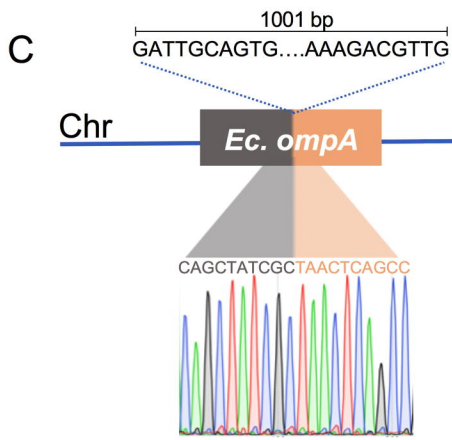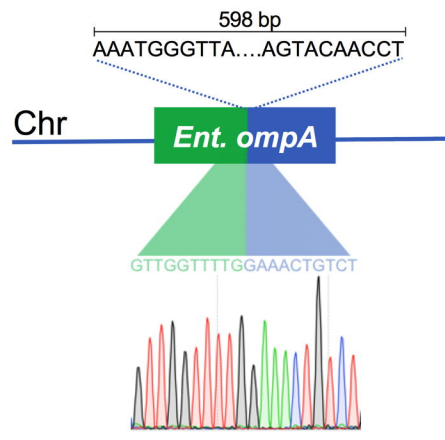



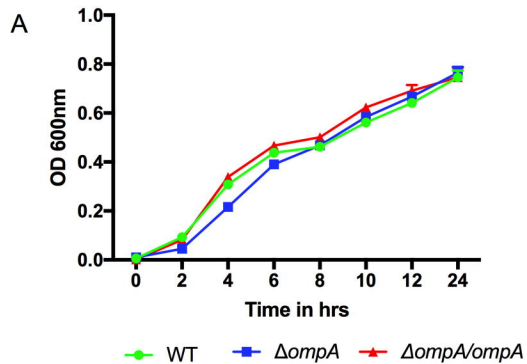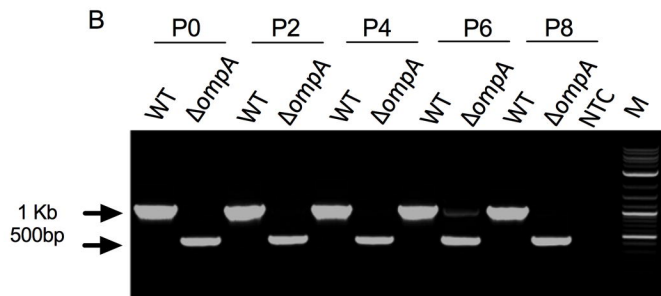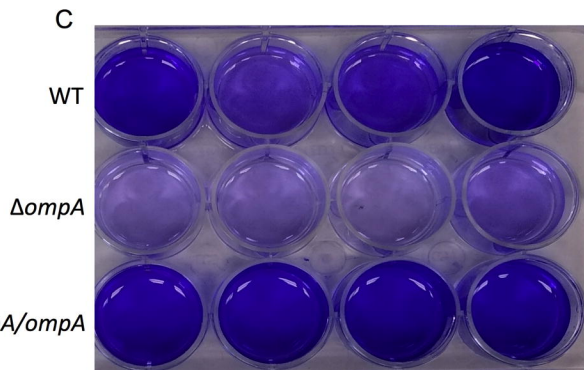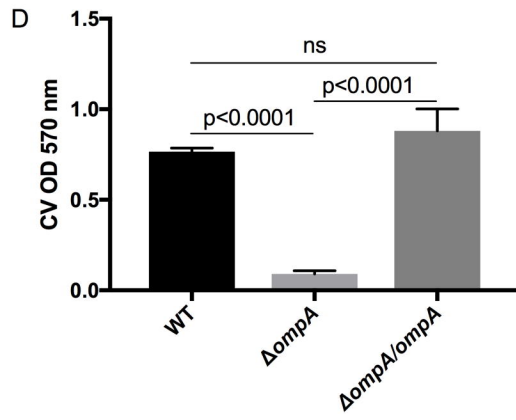

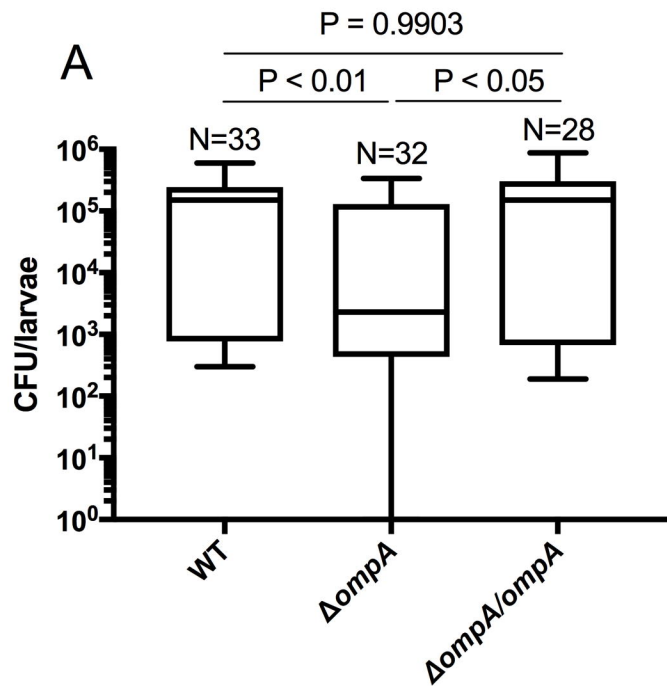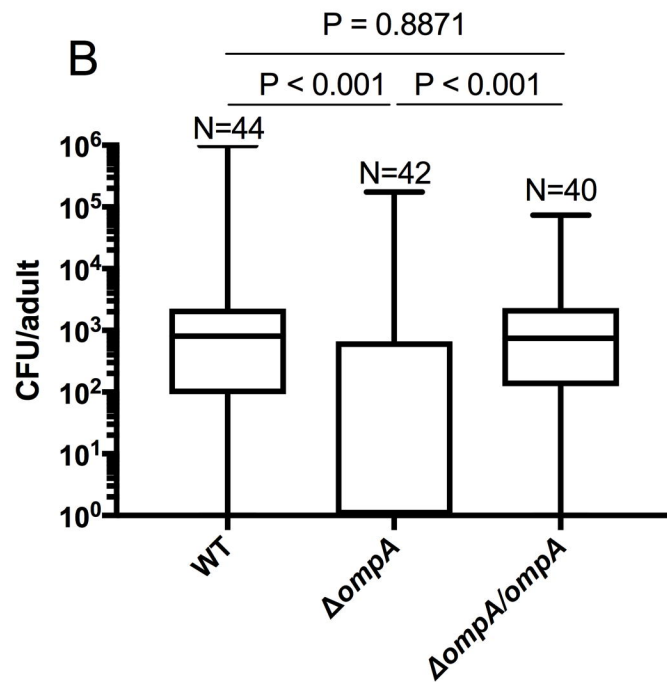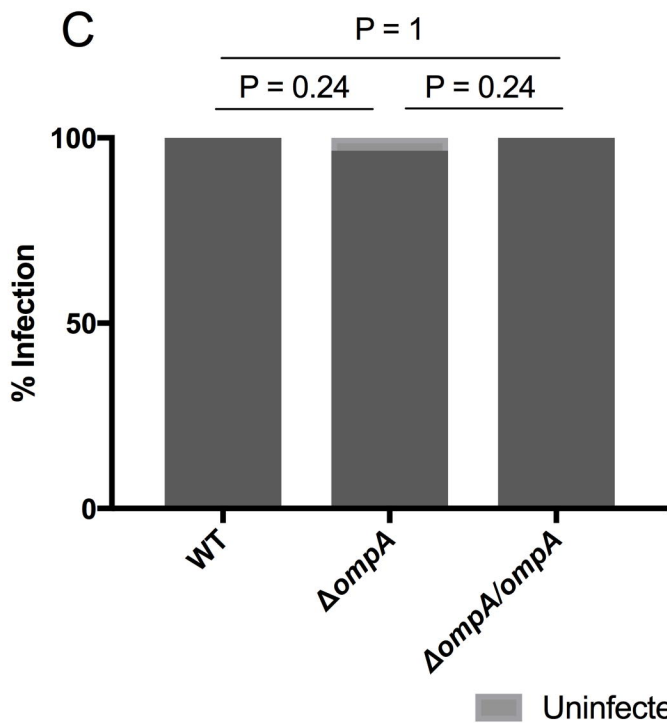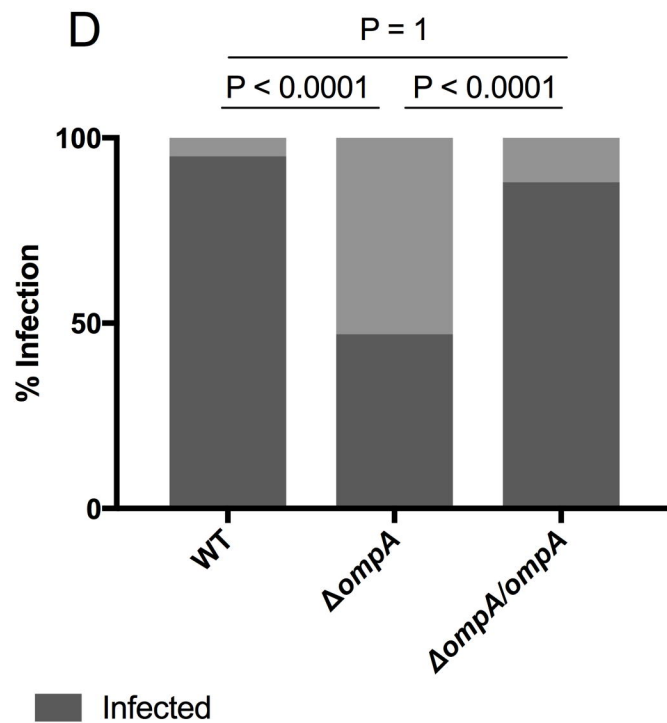

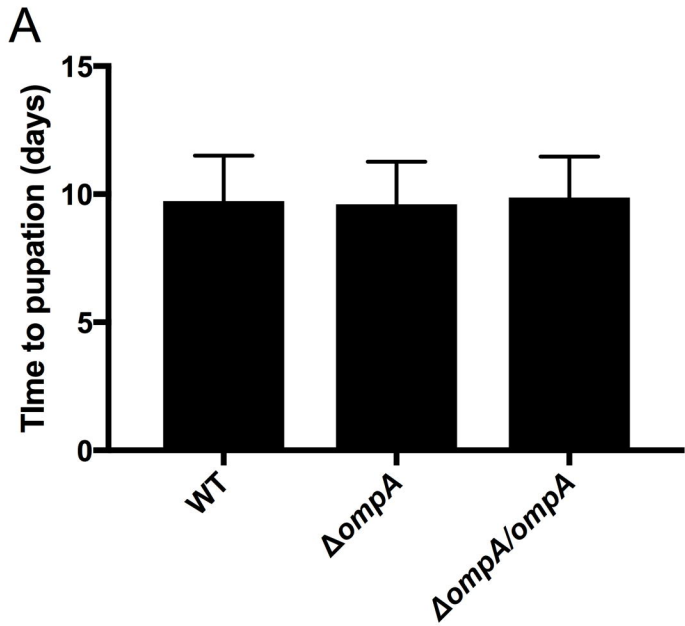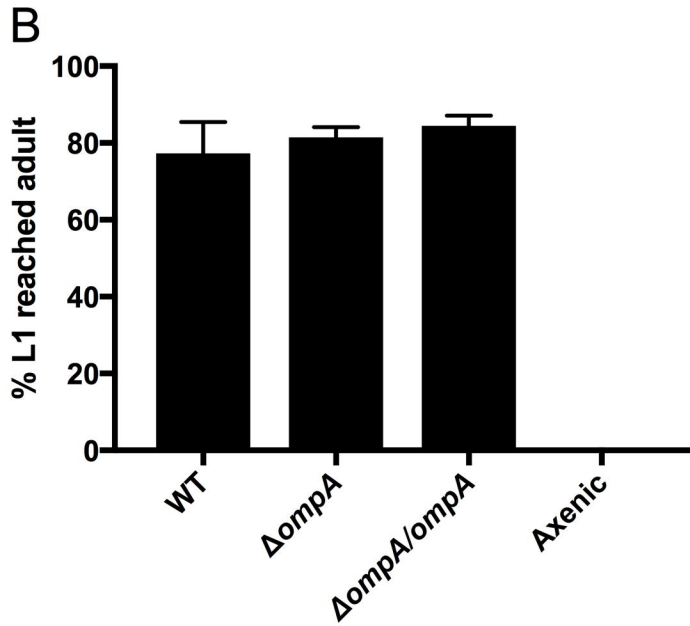

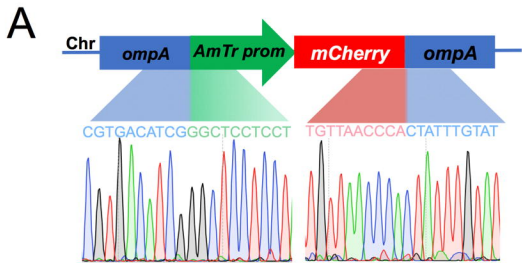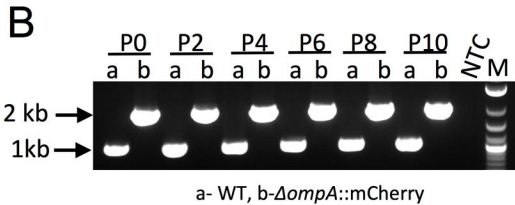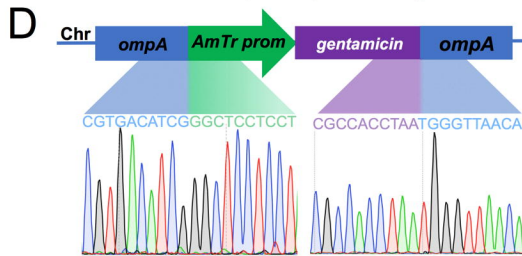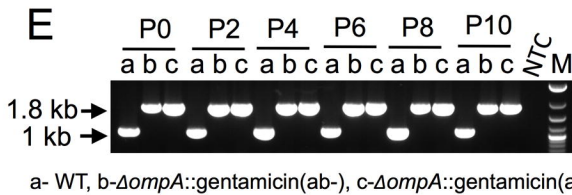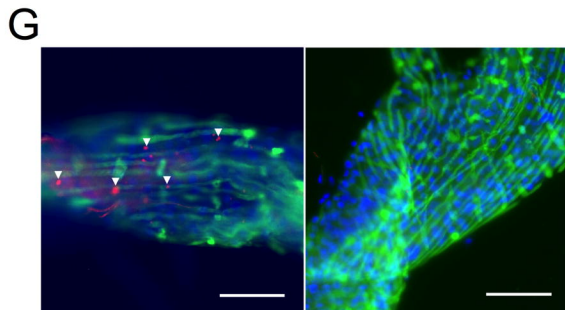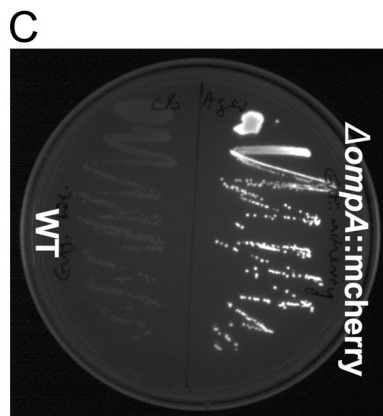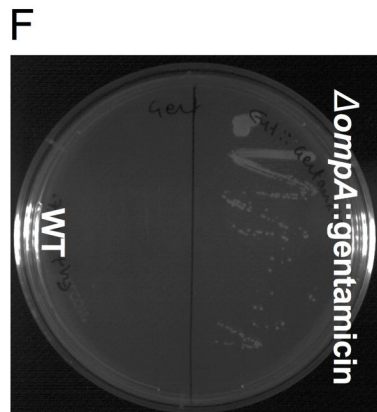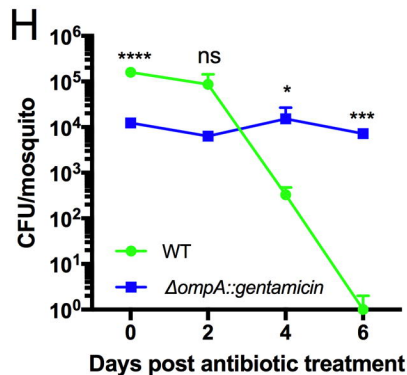

Source: https://www.biorxiv.org/content/early/2018/08/14/389957.full.pdf
